# Supplementary figures and images for: Quinine Esters with 1,2-Azole, Pyridine and Adamantane Fragments
Source: MDPI journal article supplement (doi:10.3390/molecules27113476), 2022-05-27

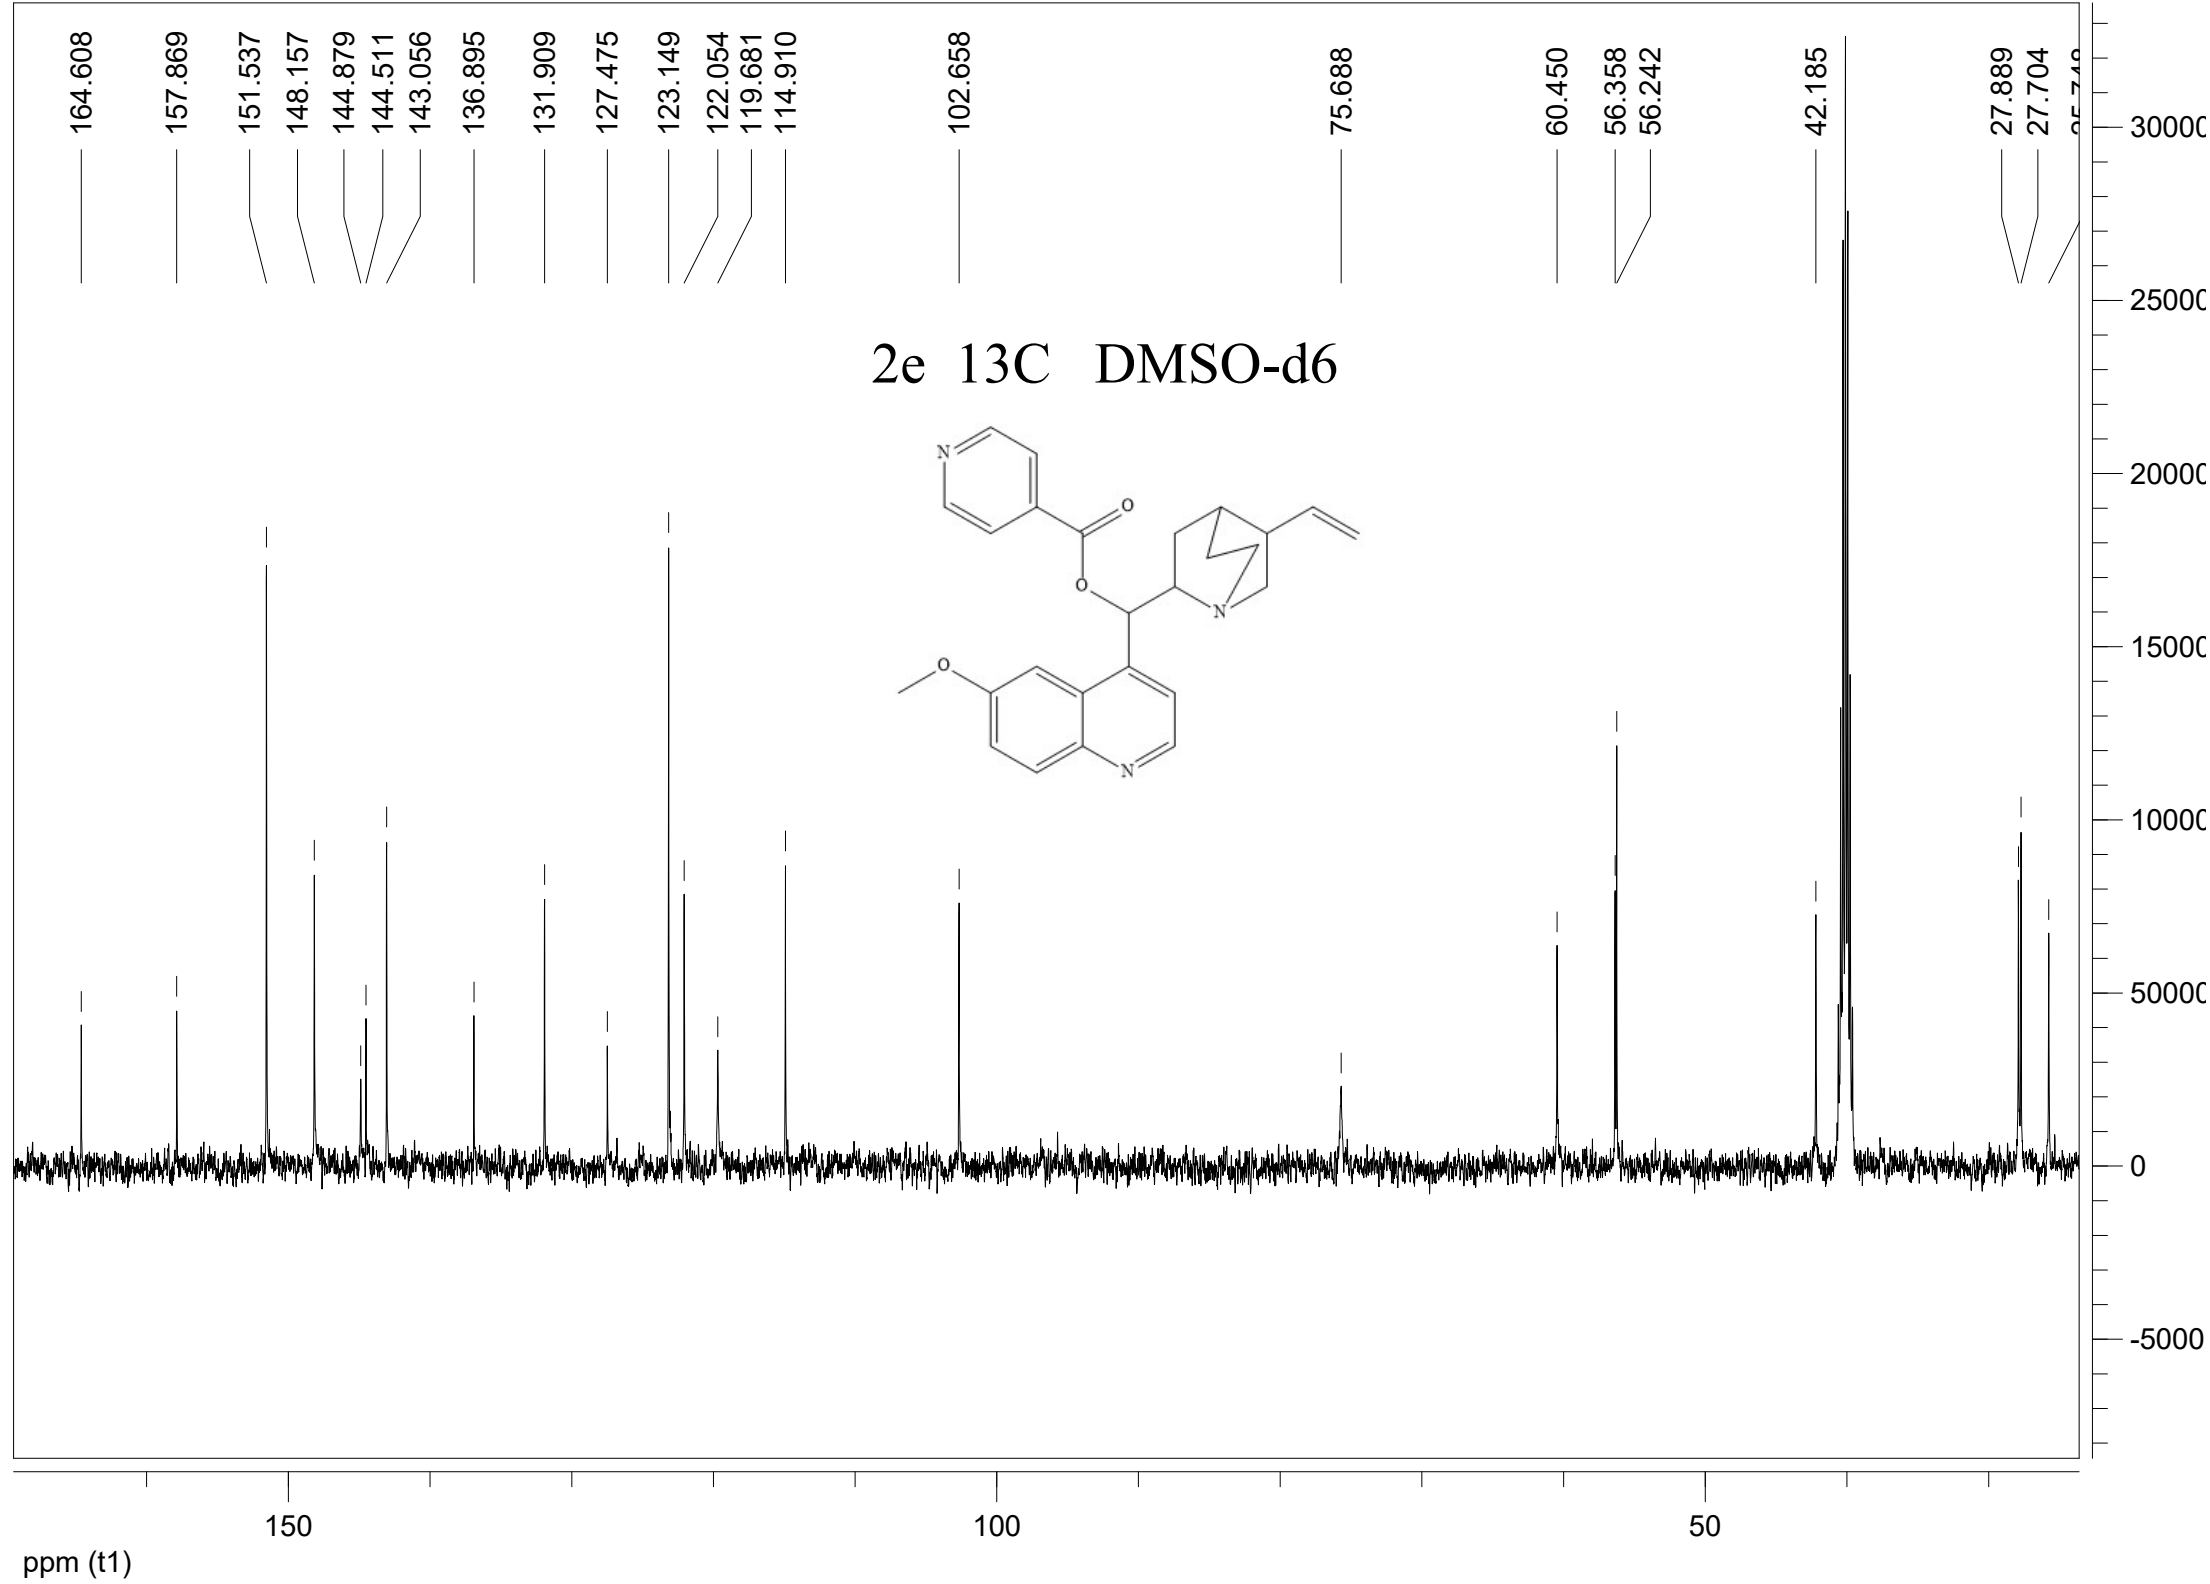

Supplement: s1 [file s1]

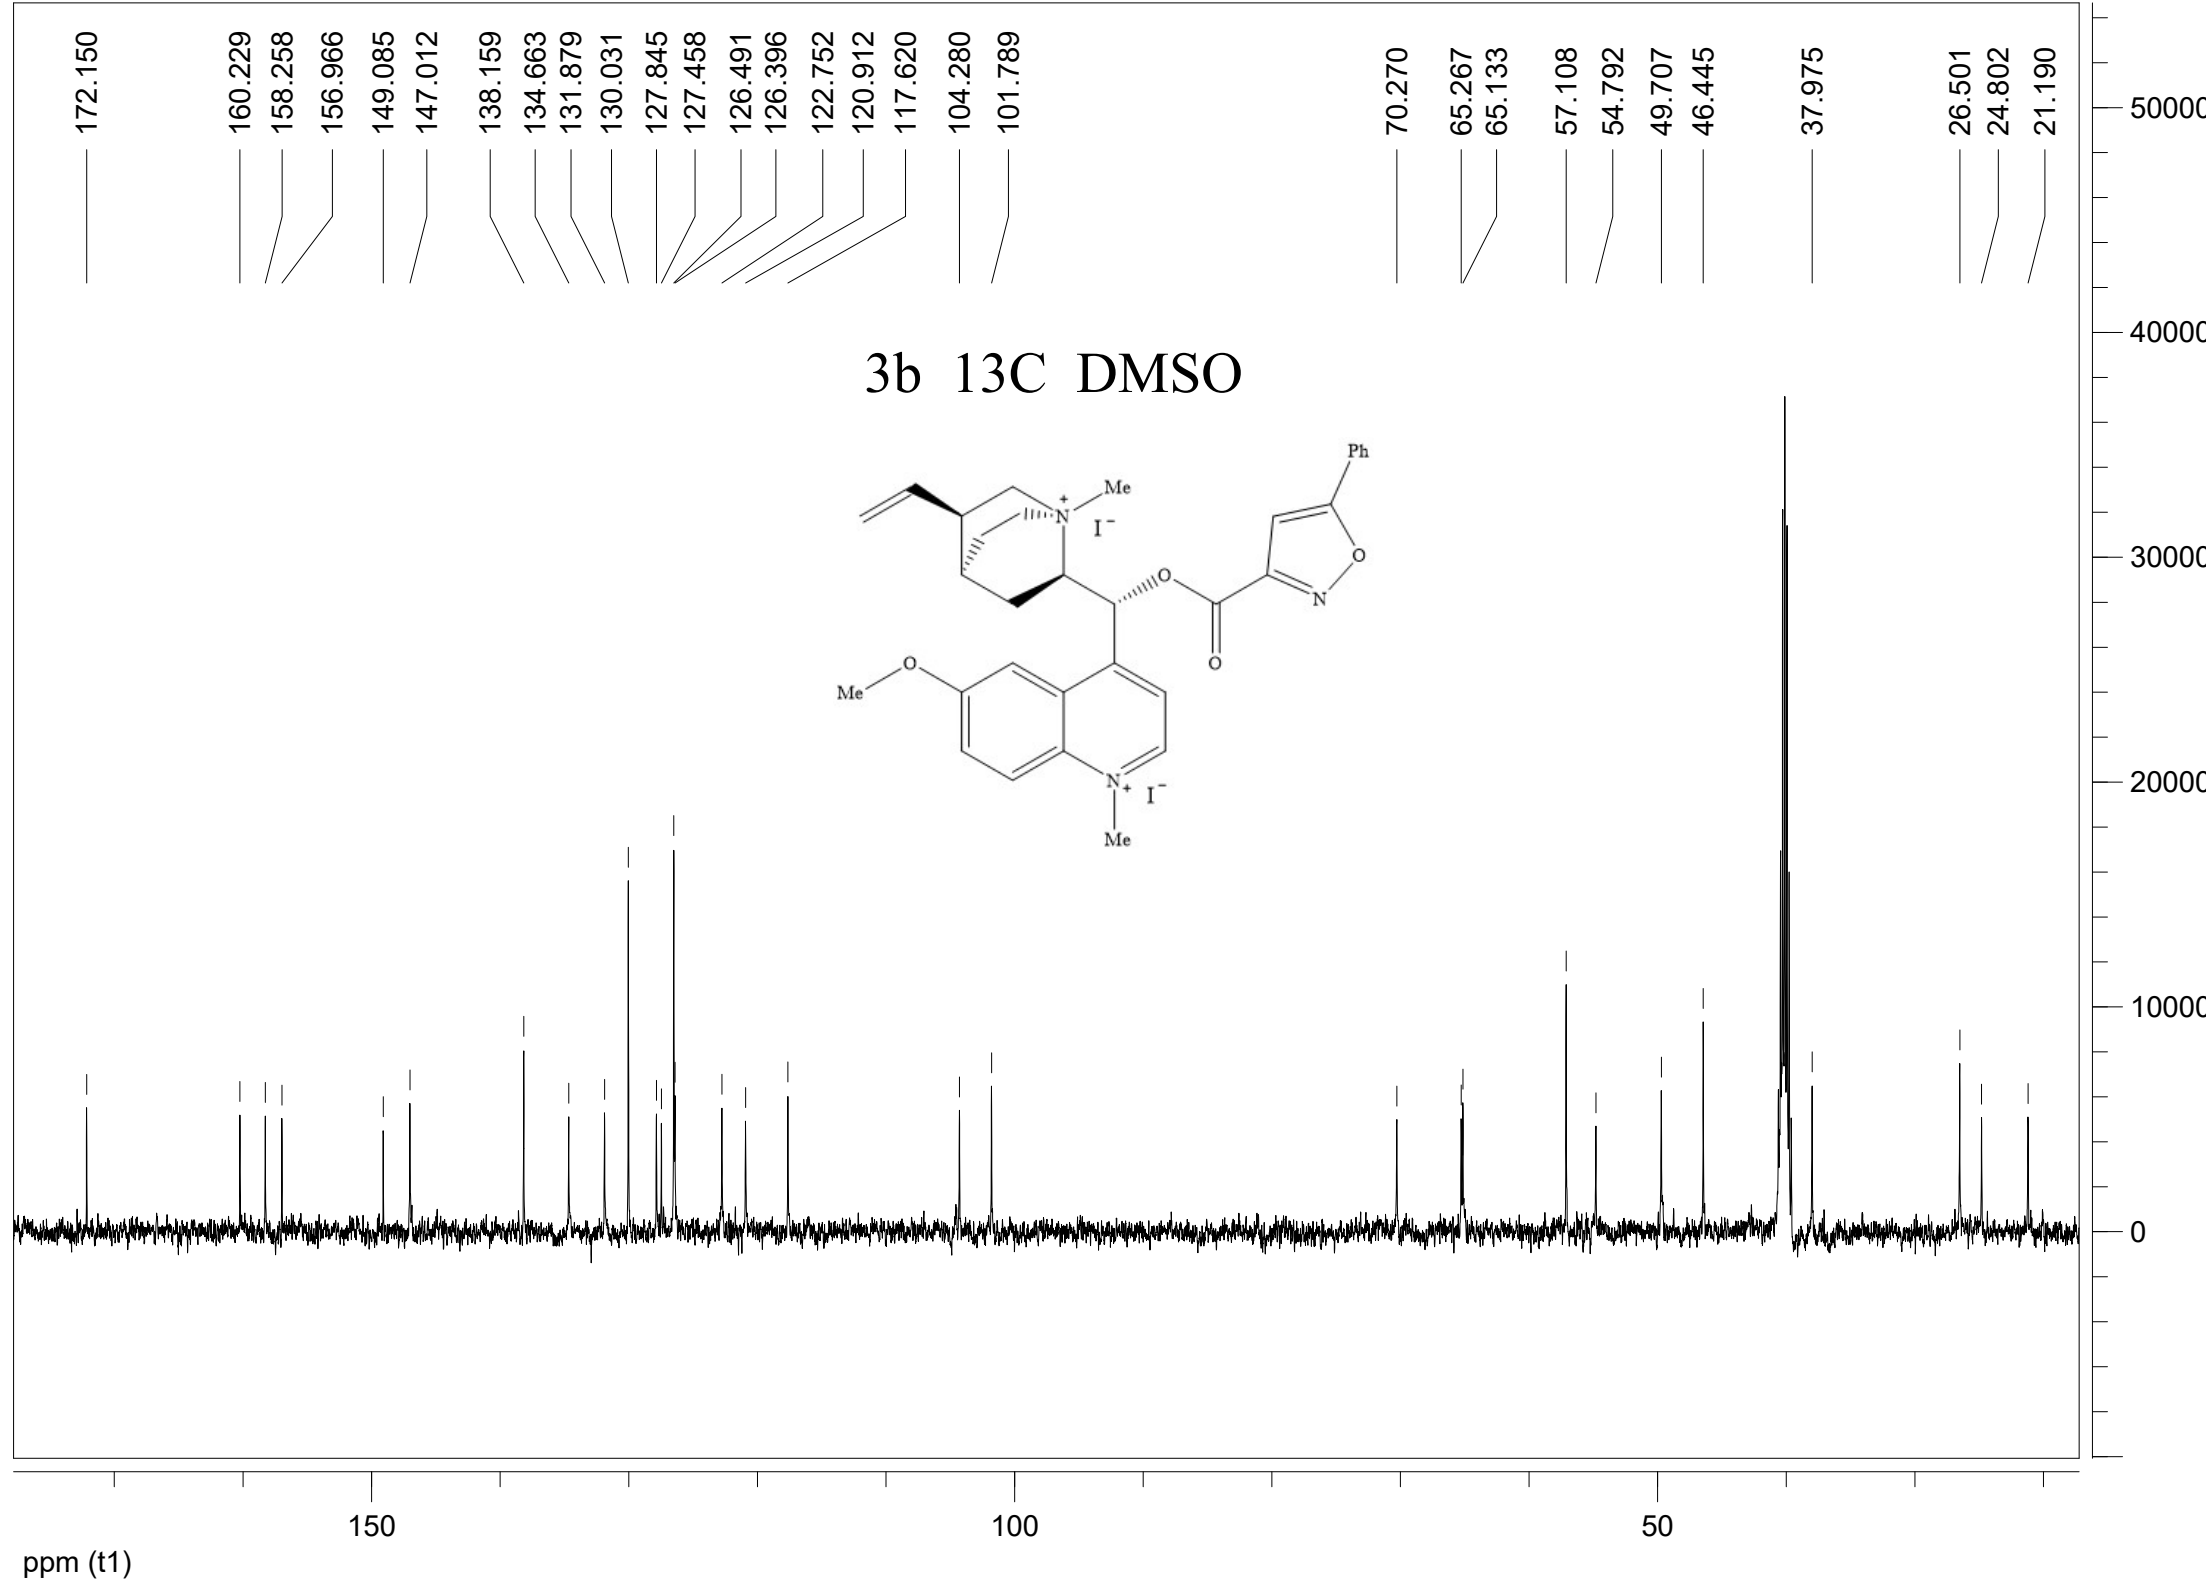

Supplement: s1 [file s1]

3e <sup>1</sup>H DMSO-d<sub>6</sub>

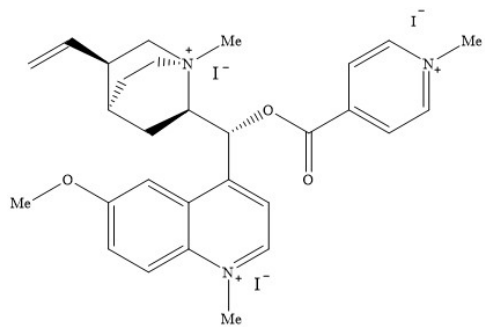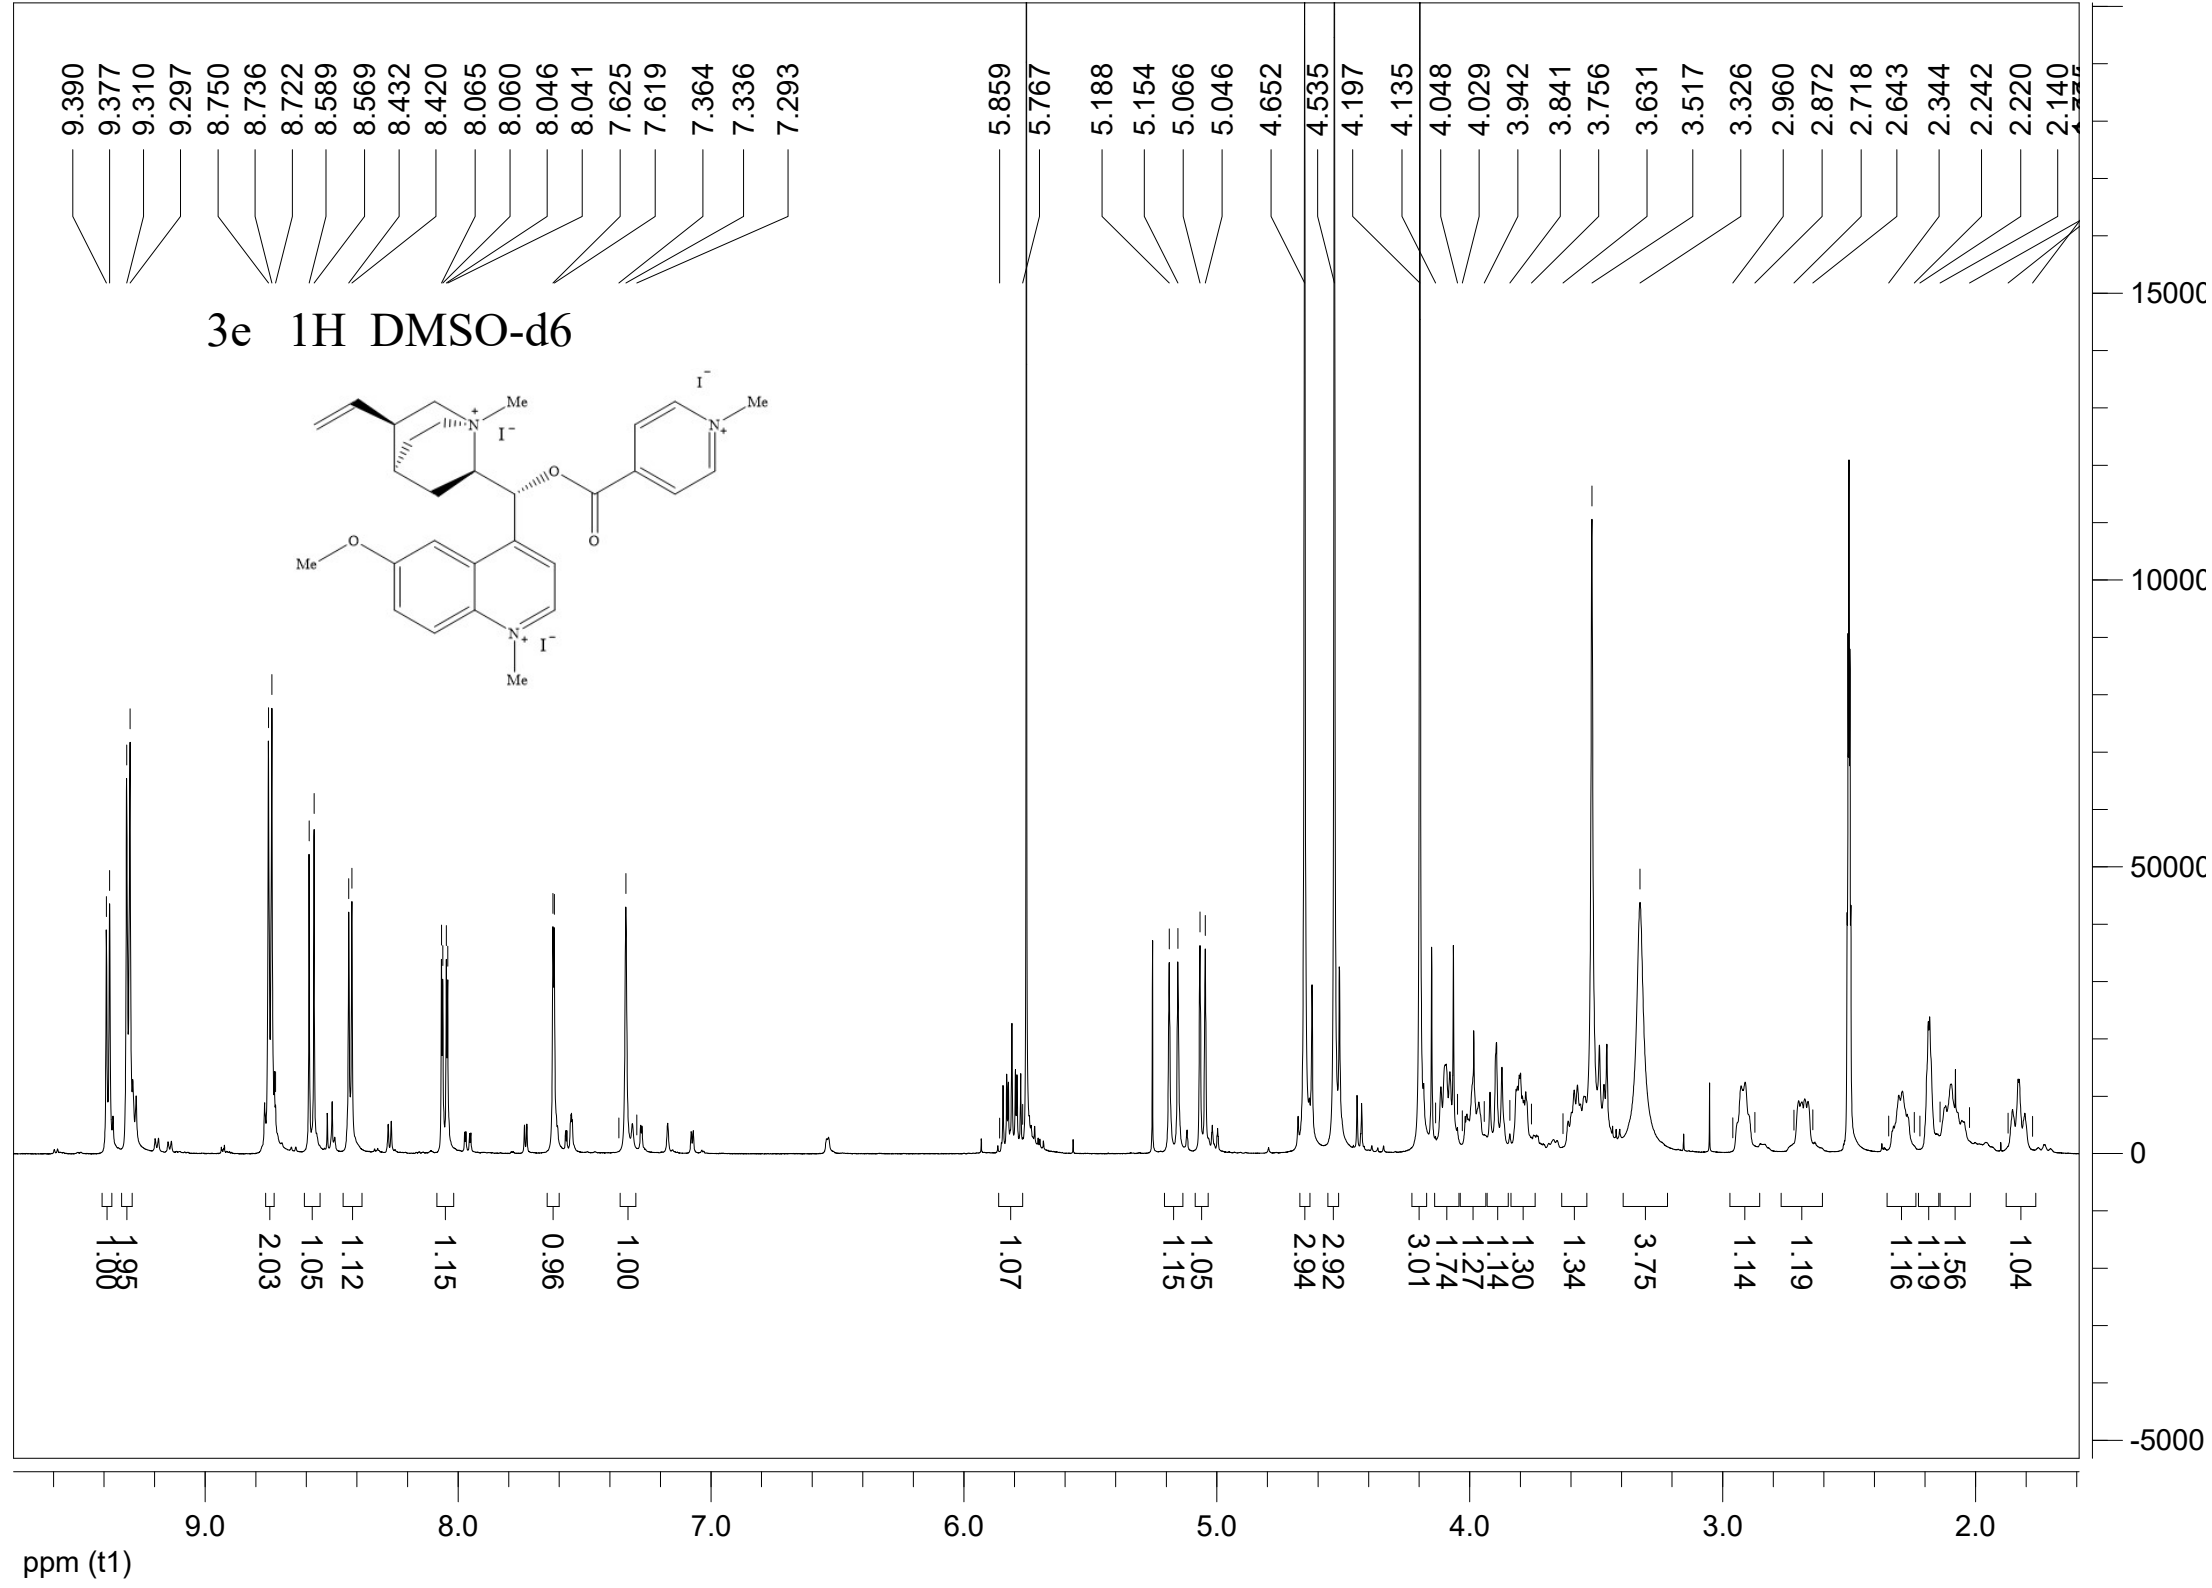

Supplement: s1 [file s1]

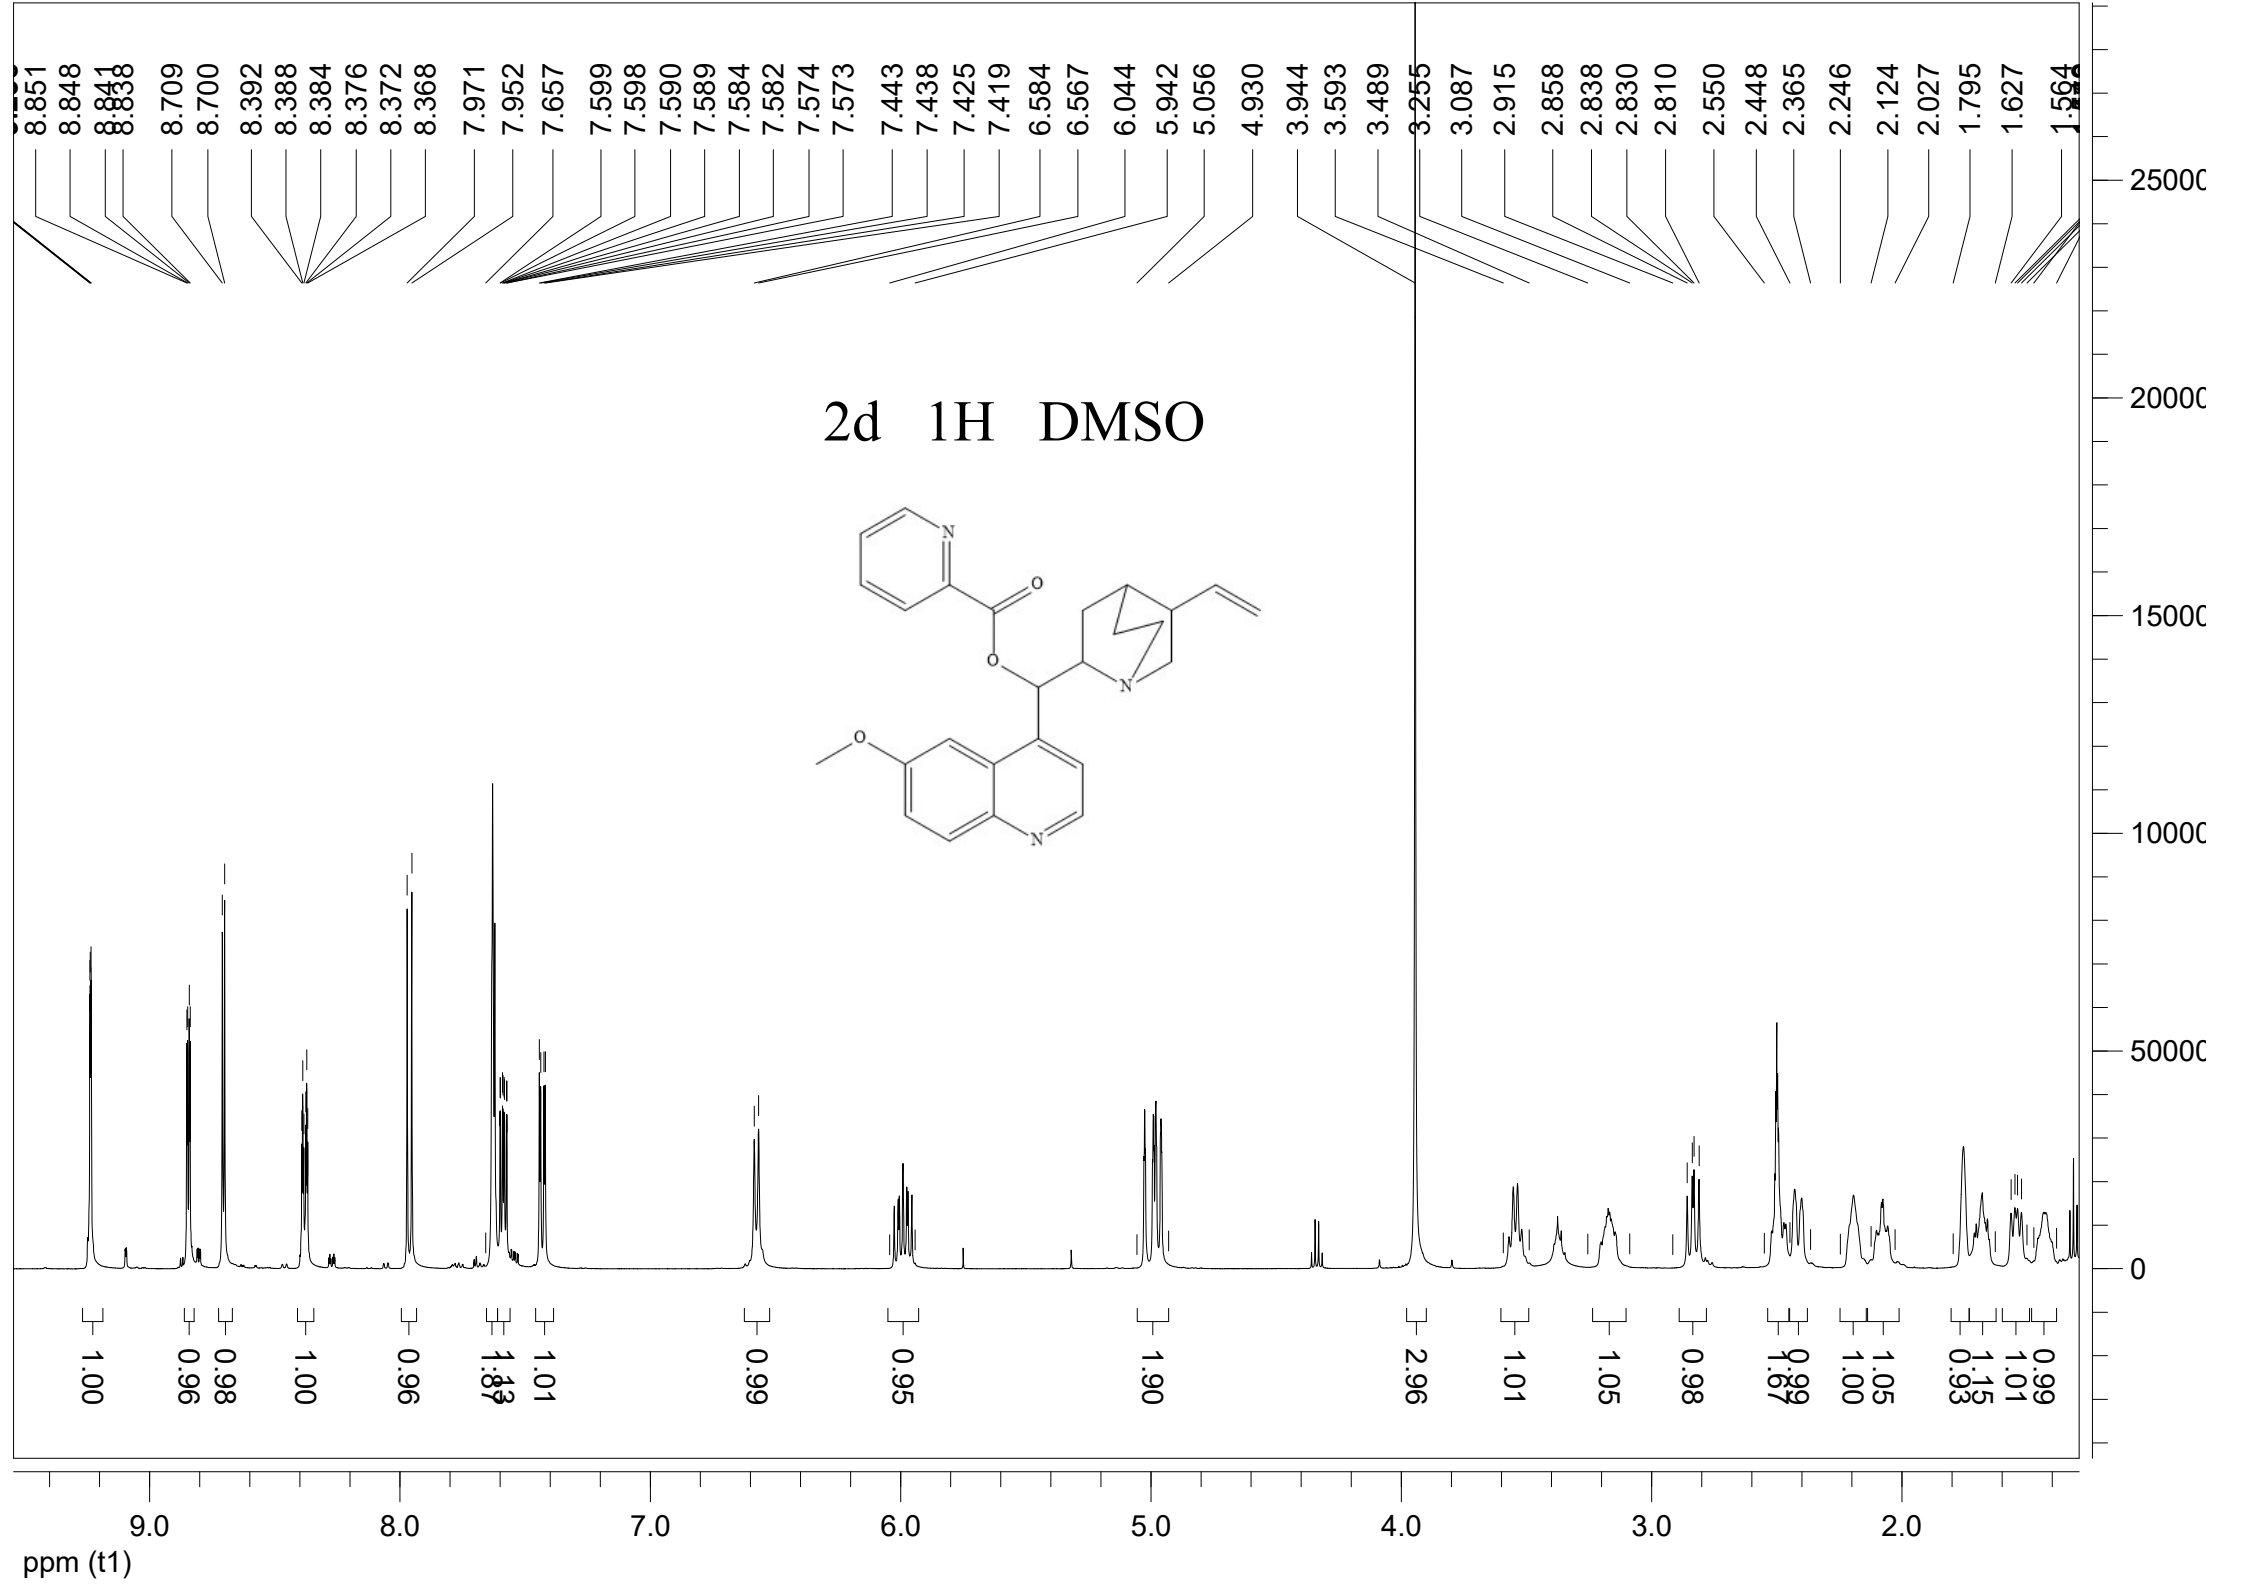

Supplement: s1 [file s1]

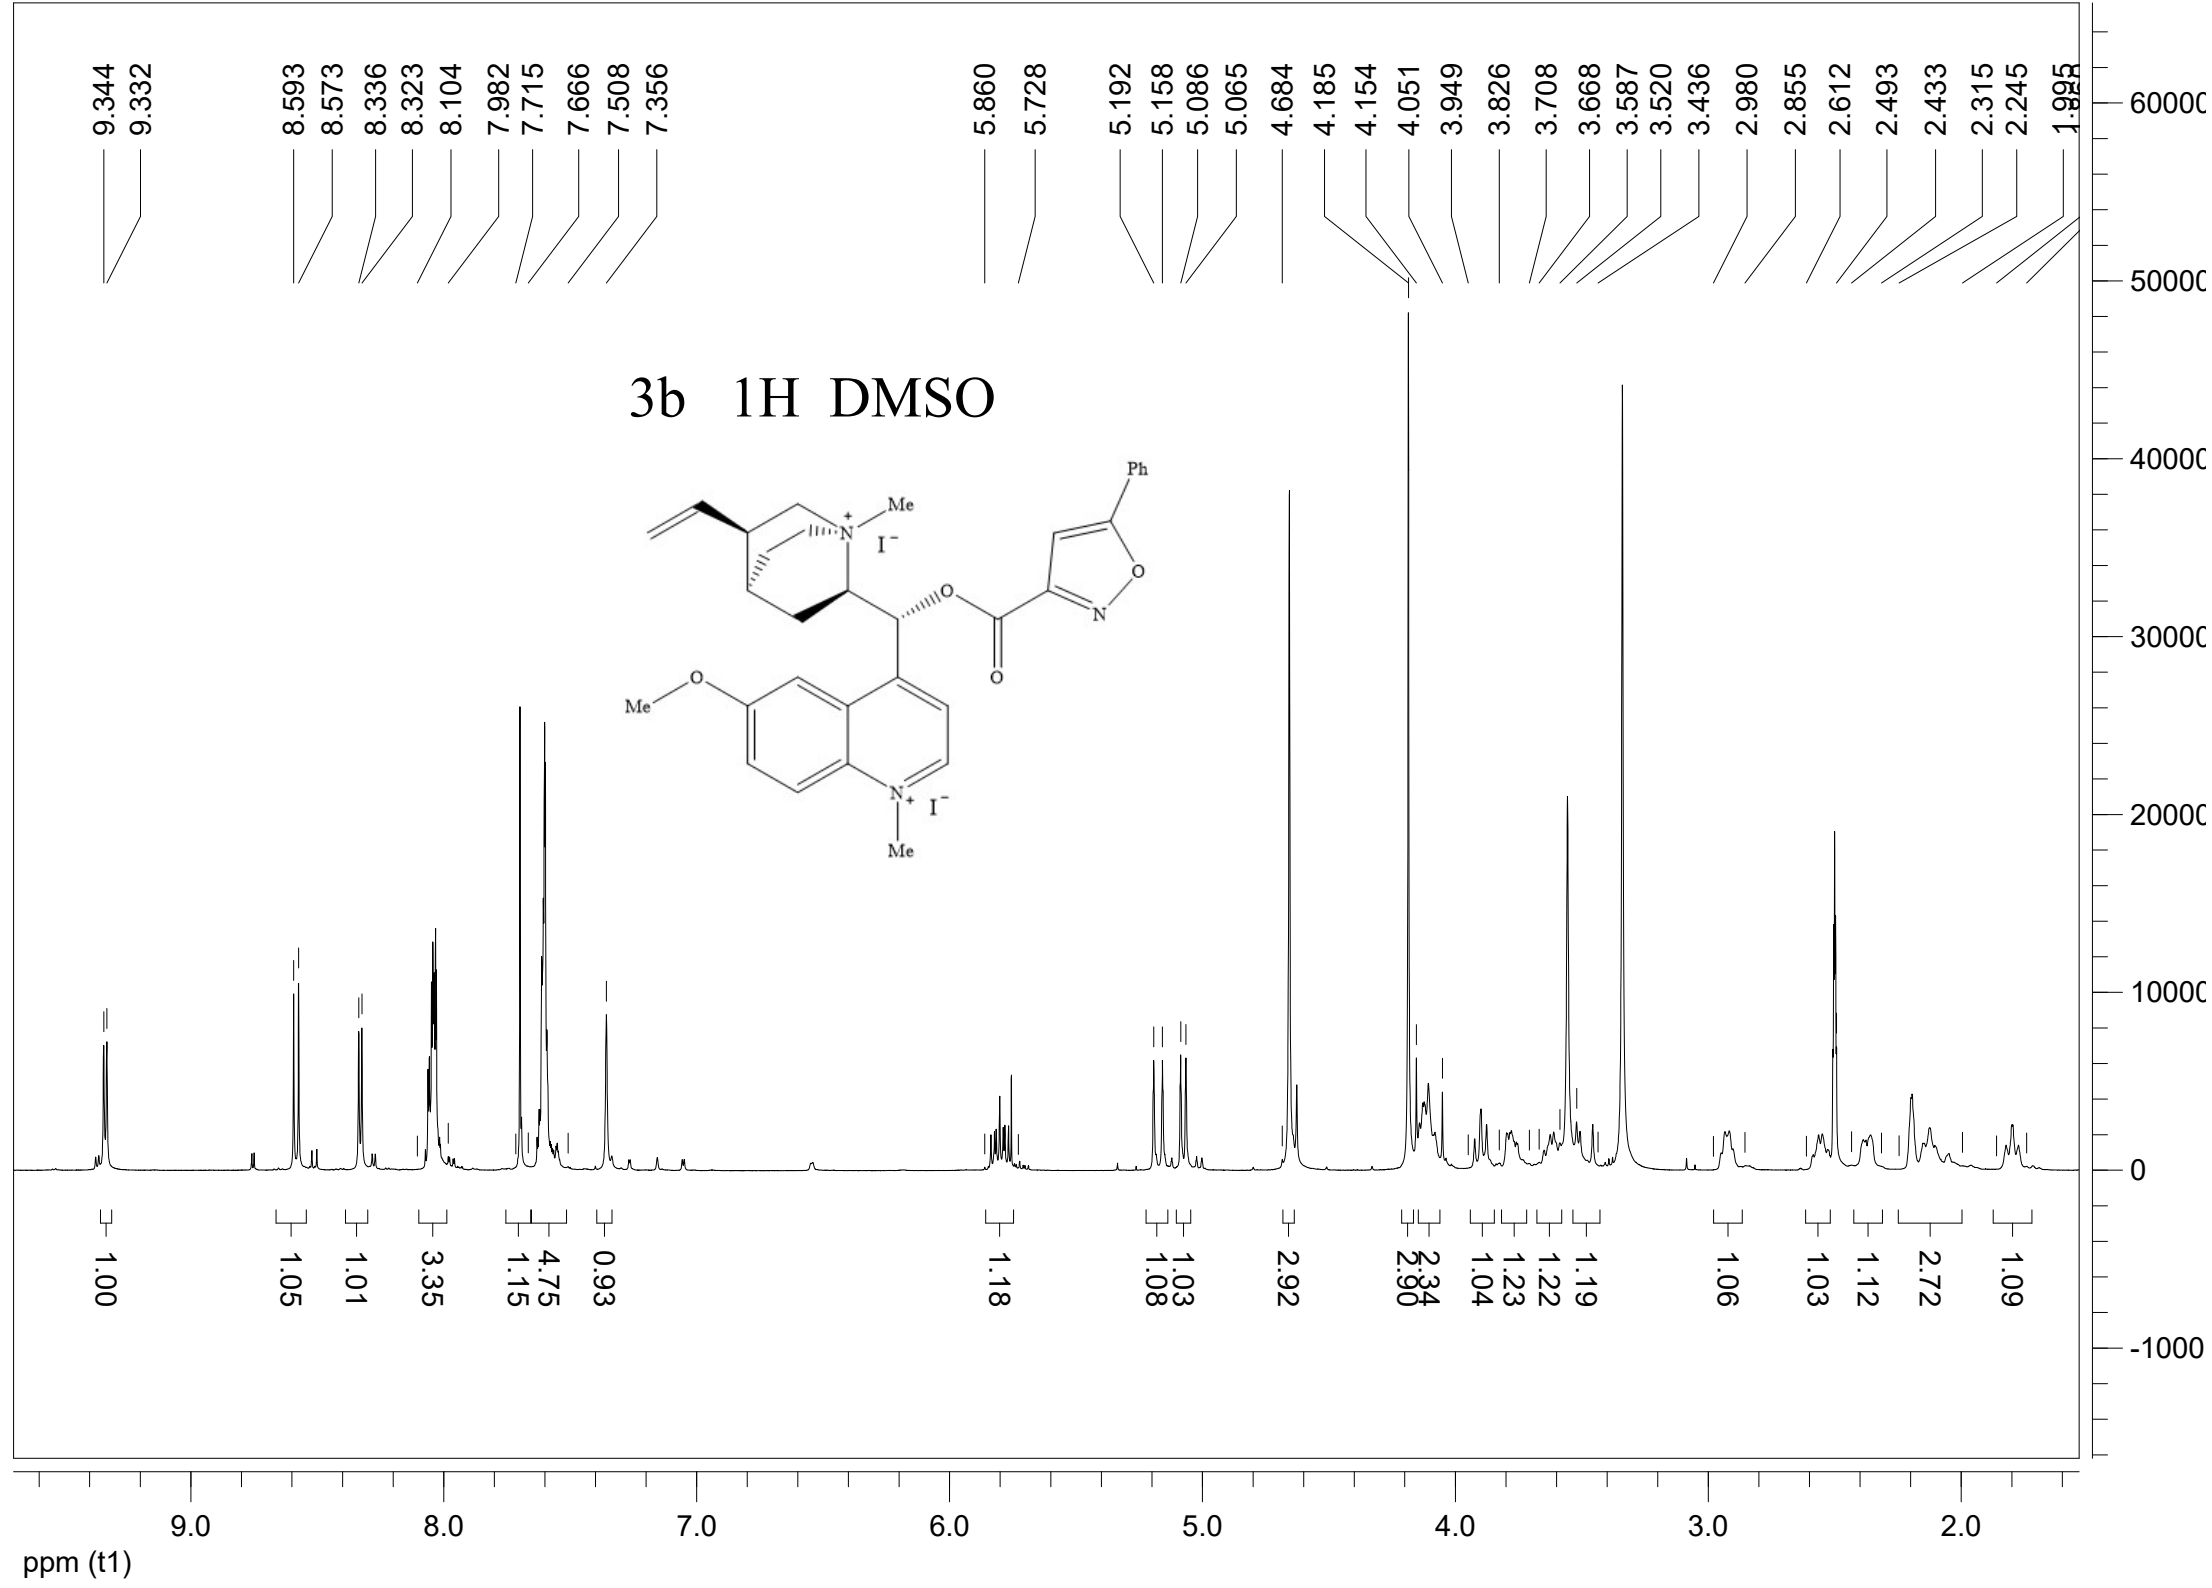

Supplement: s1 [file s1]

# 2b <sup>13</sup>C DMSO-d<sub>6</sub>

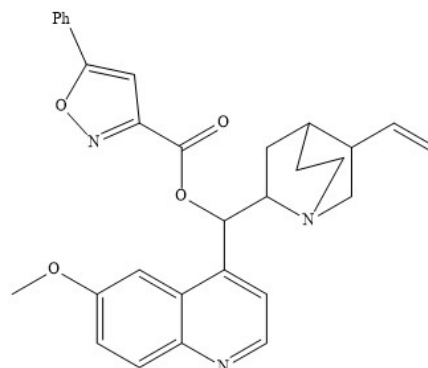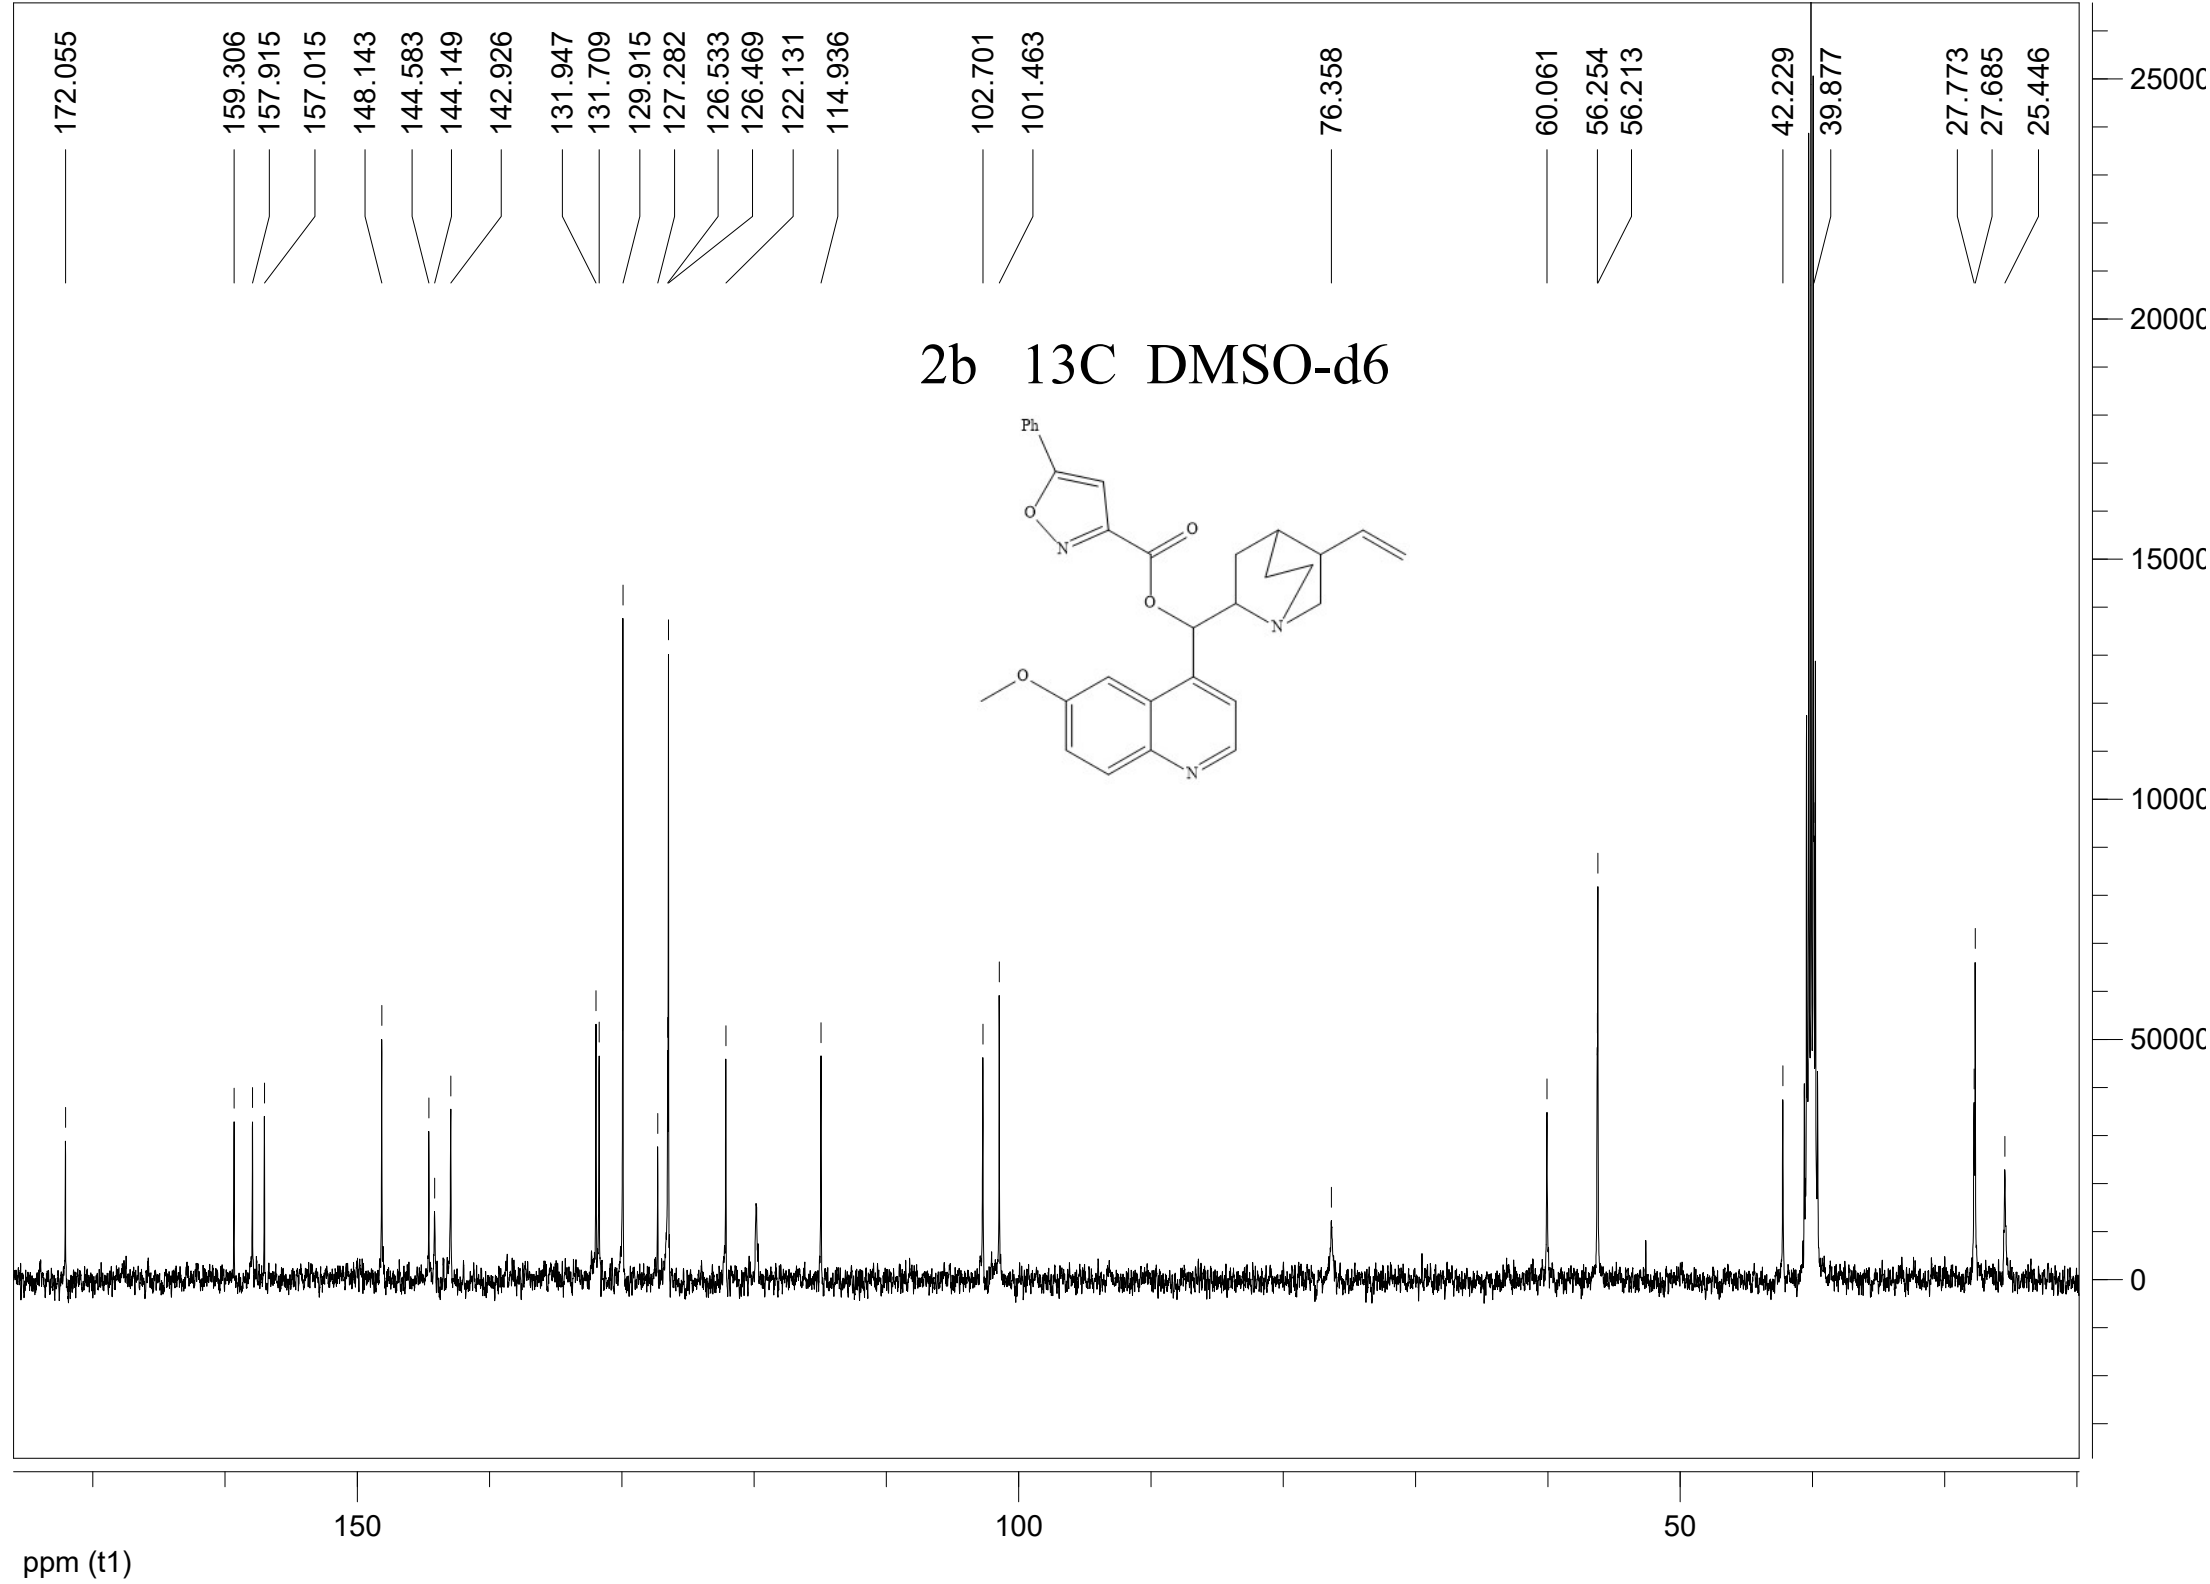

Supplement: s1 [file s1]

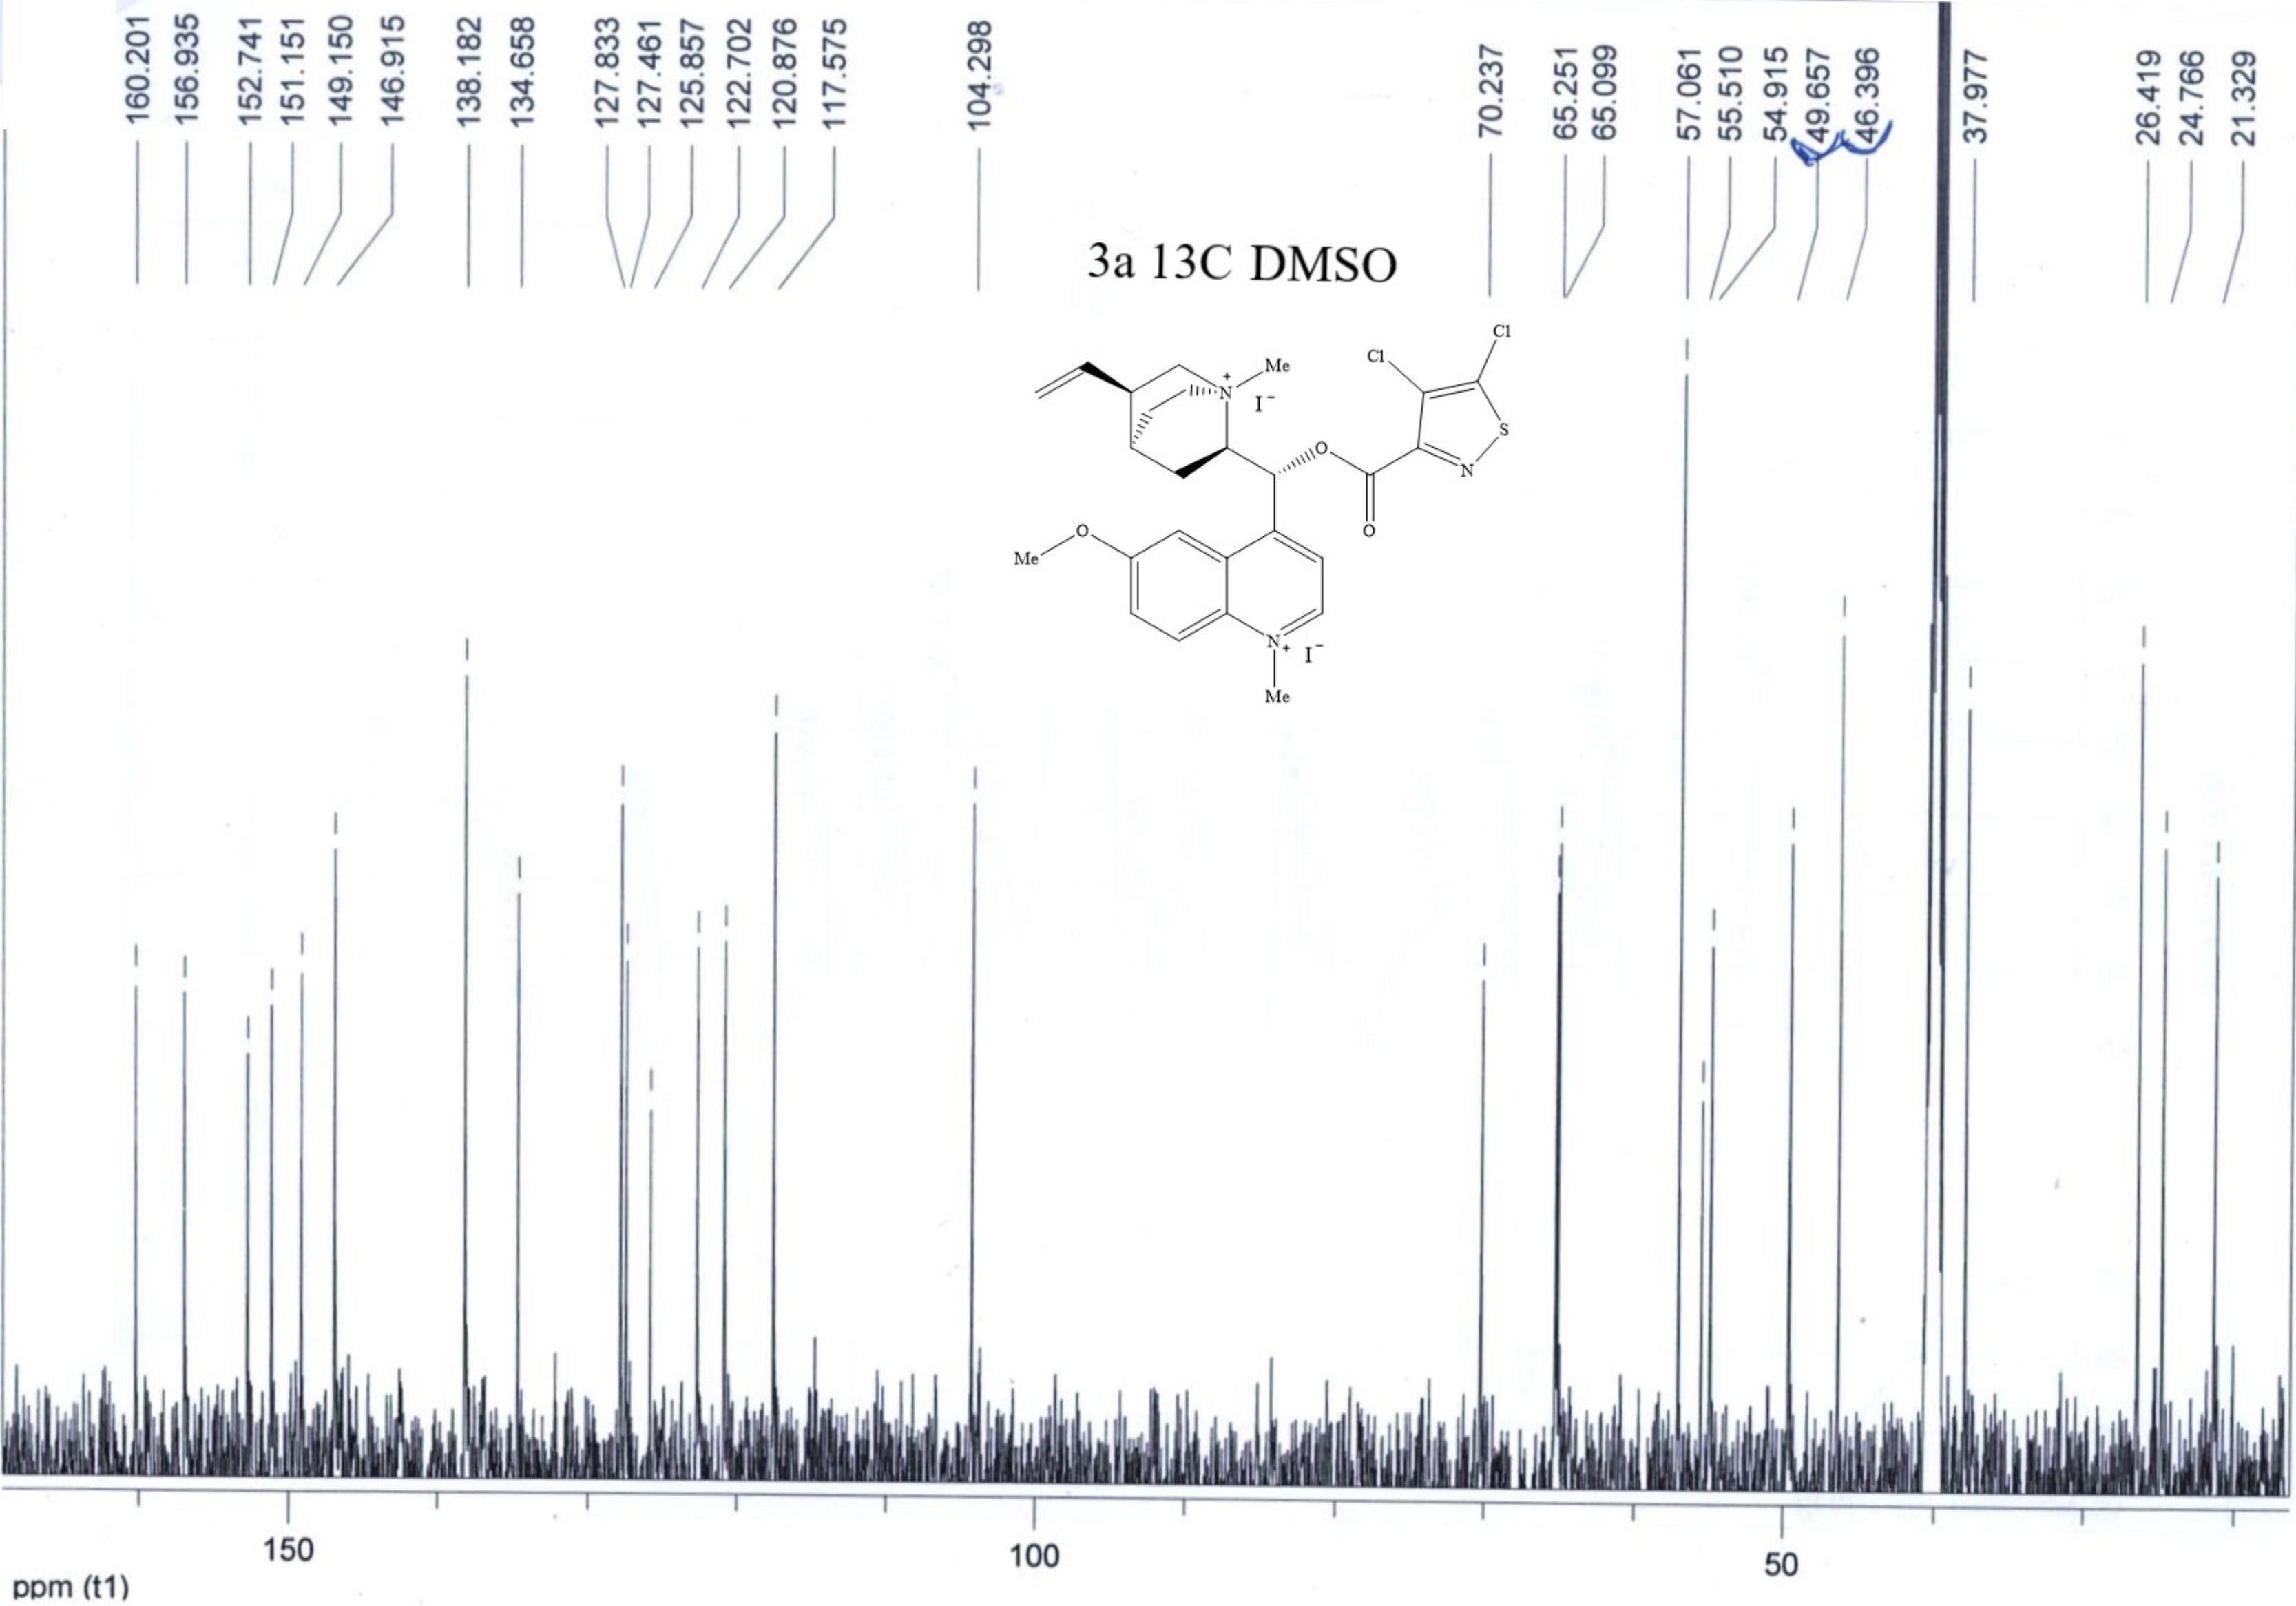

Supplement: s1 [file s1]

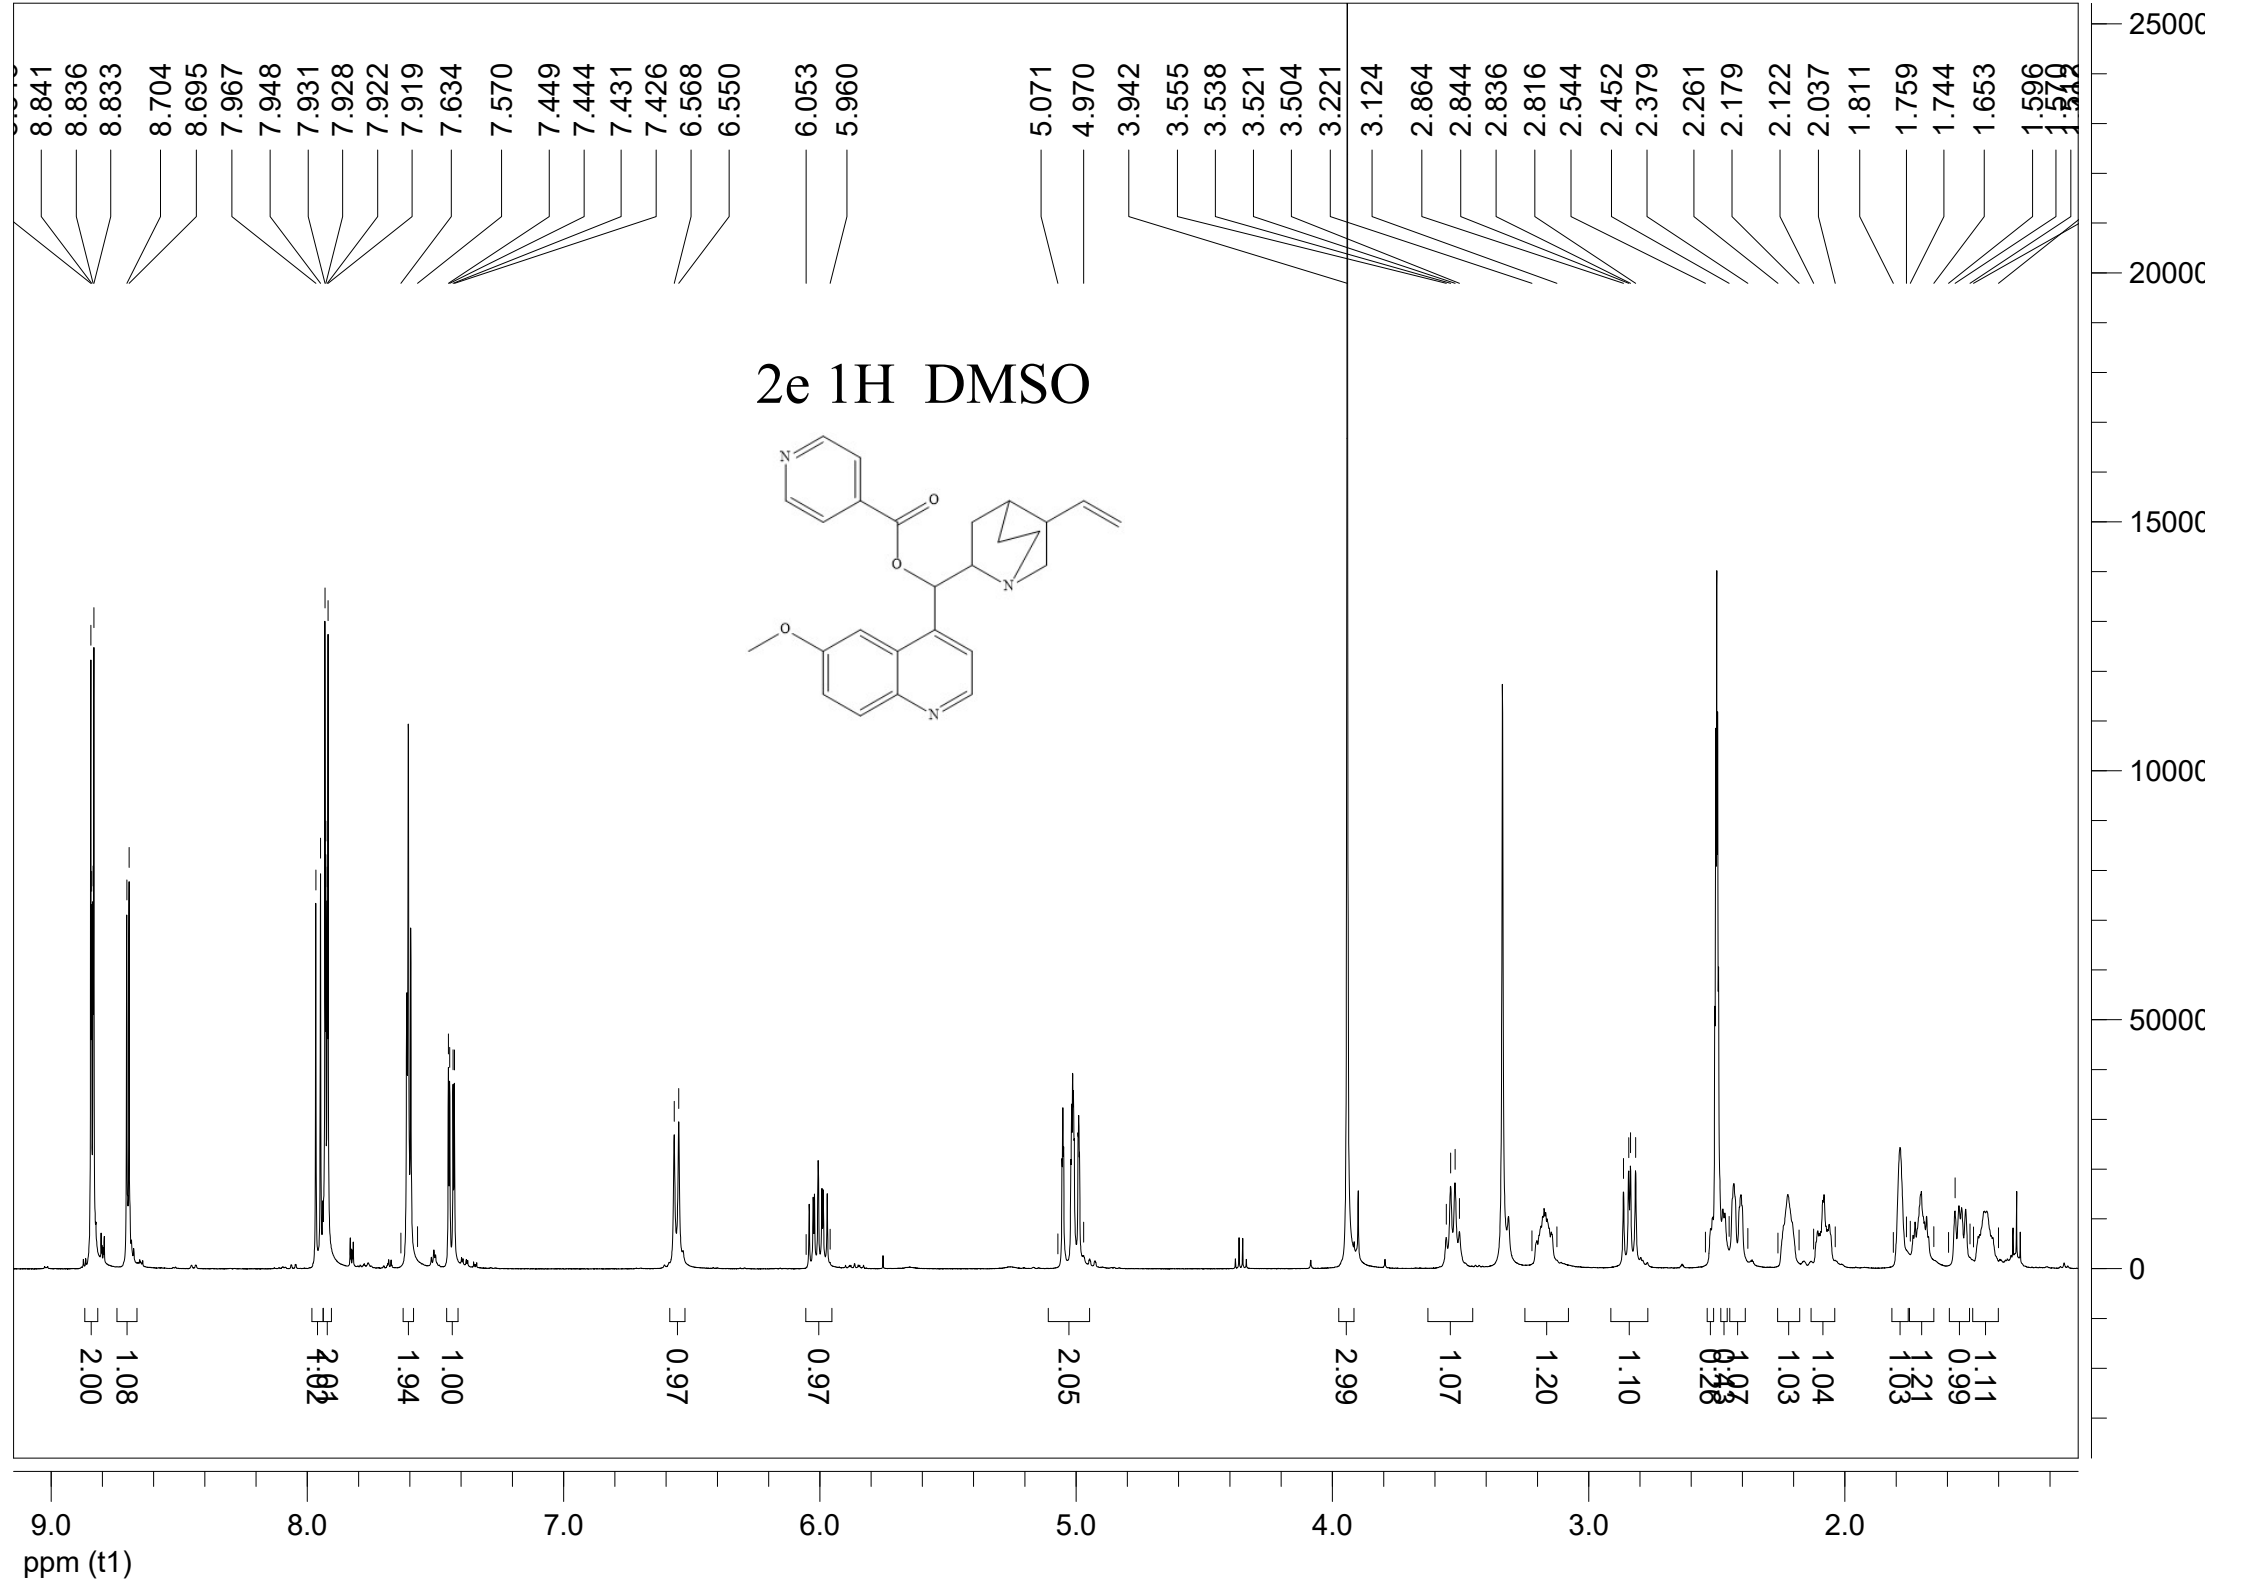

Supplement: s1 [file s1]

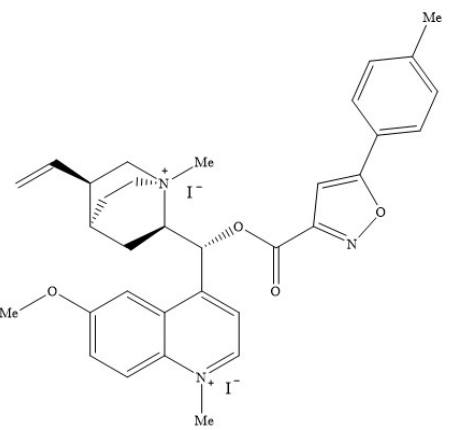

3c 1H DMSO

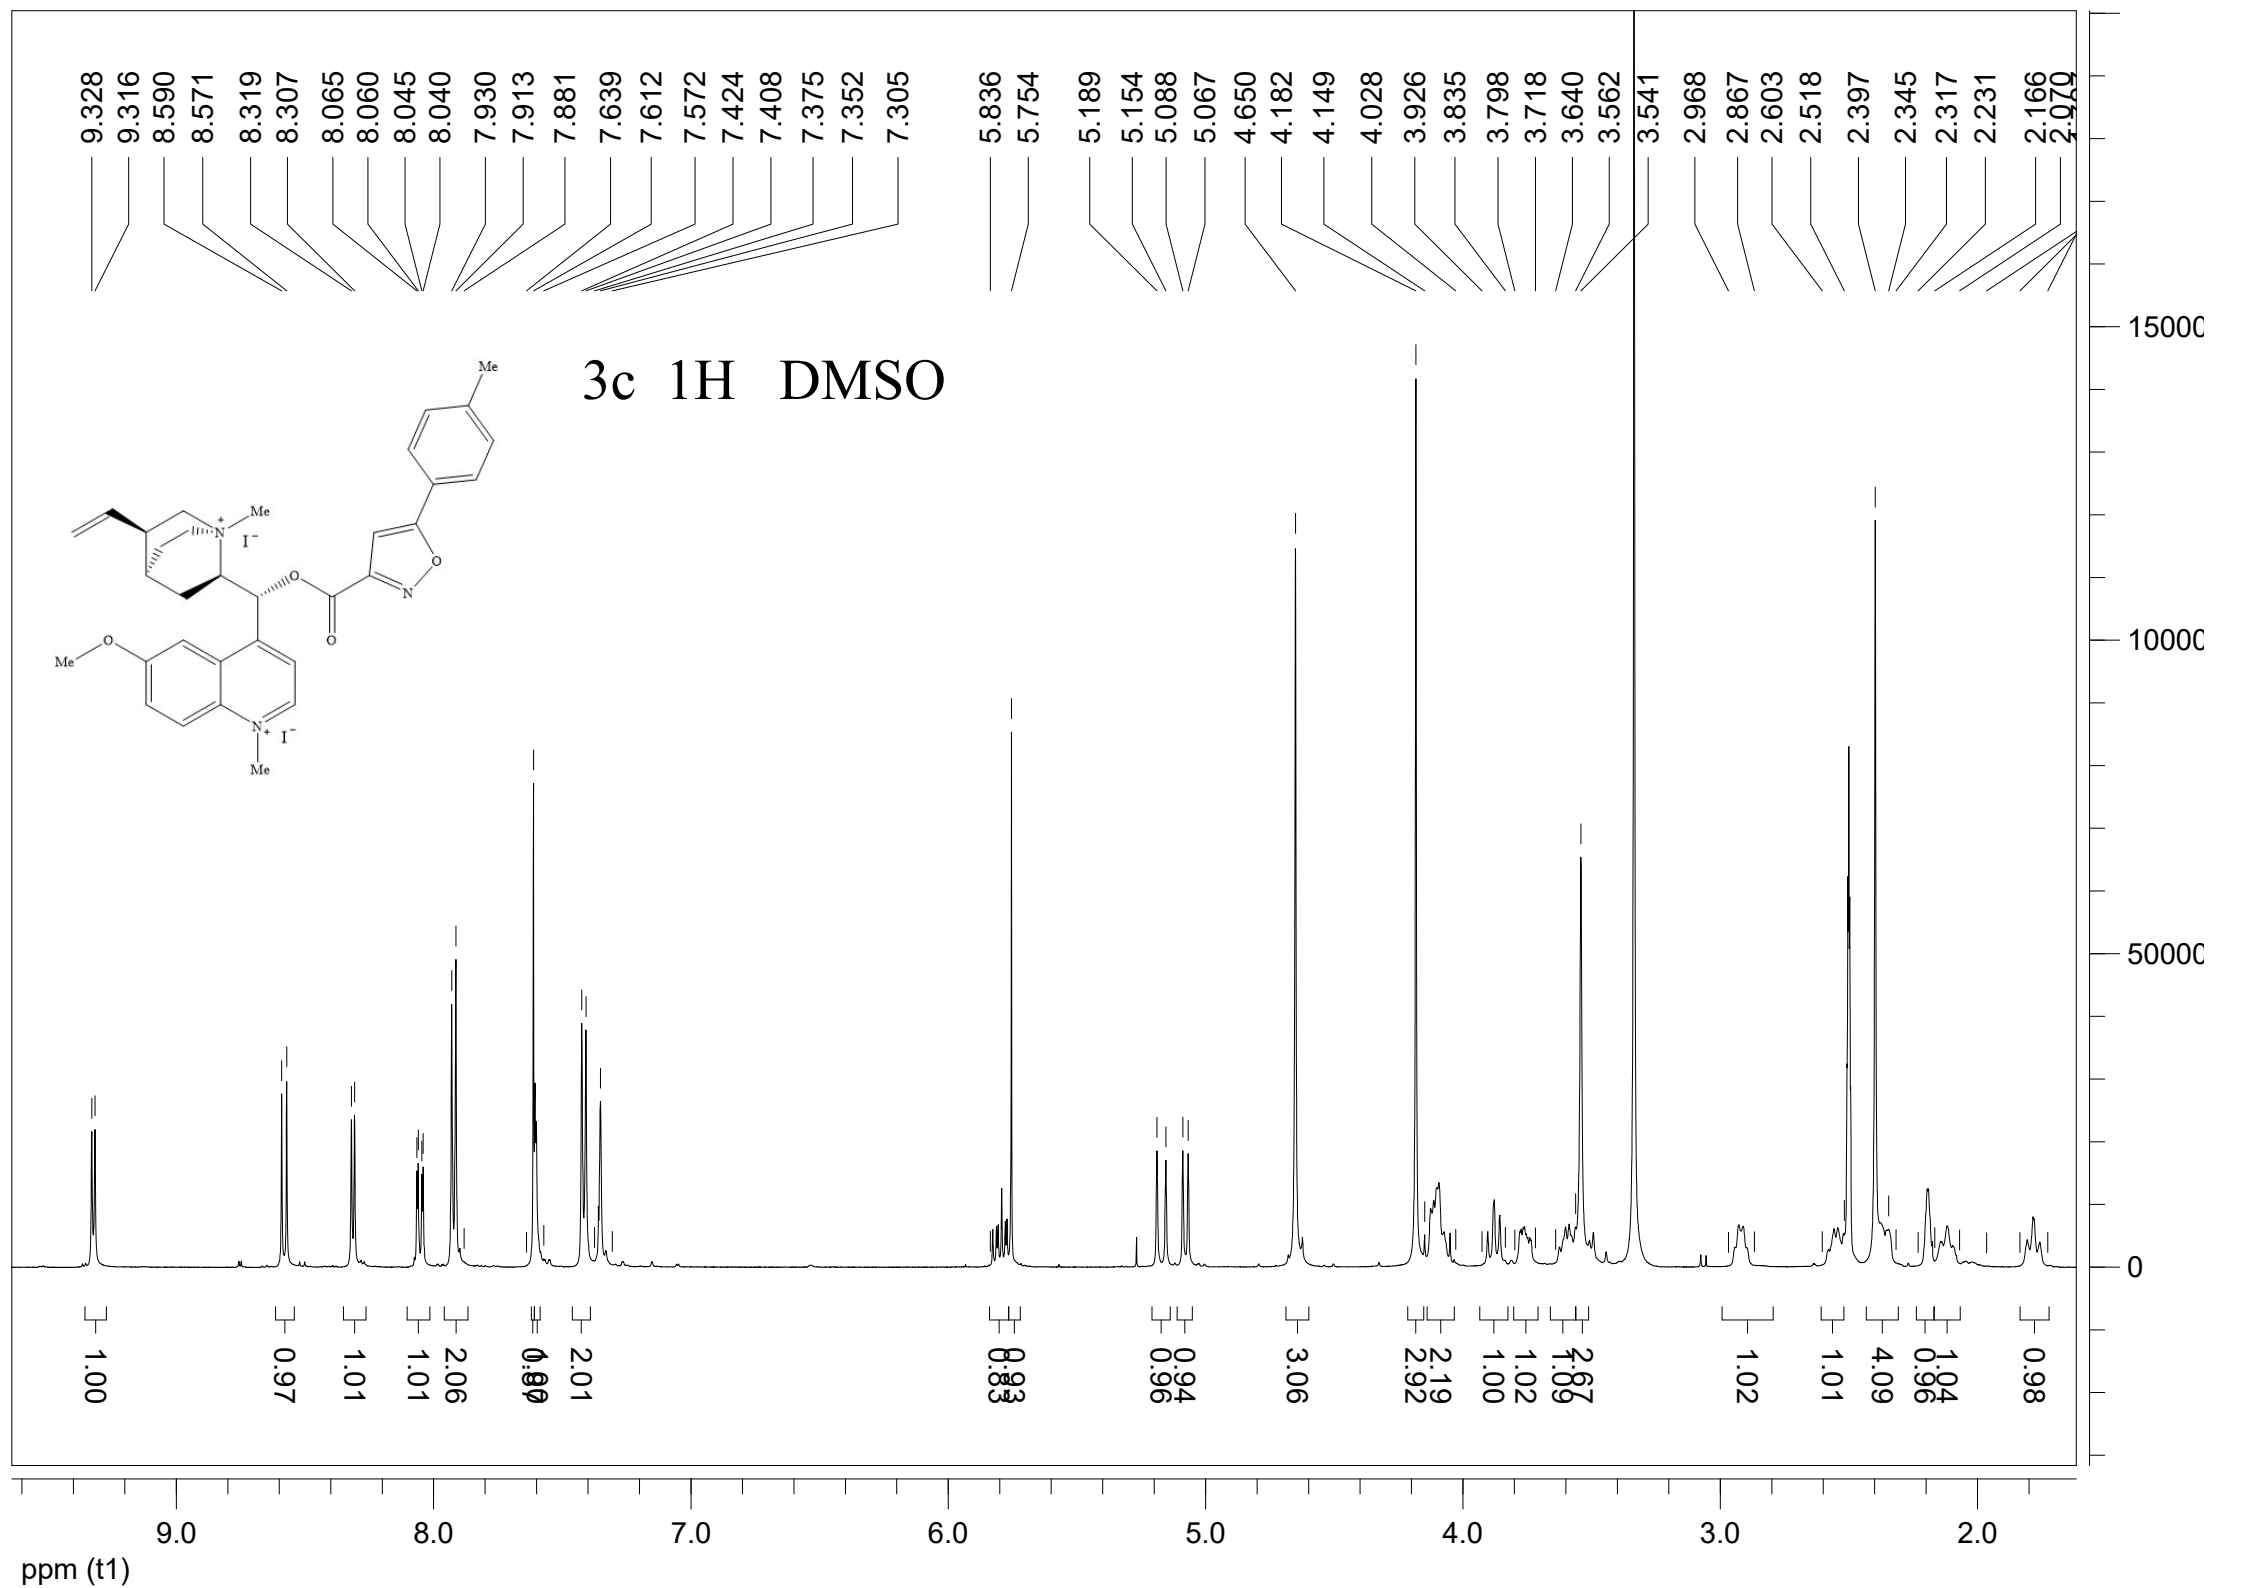

Supplement: s1 [file s1]

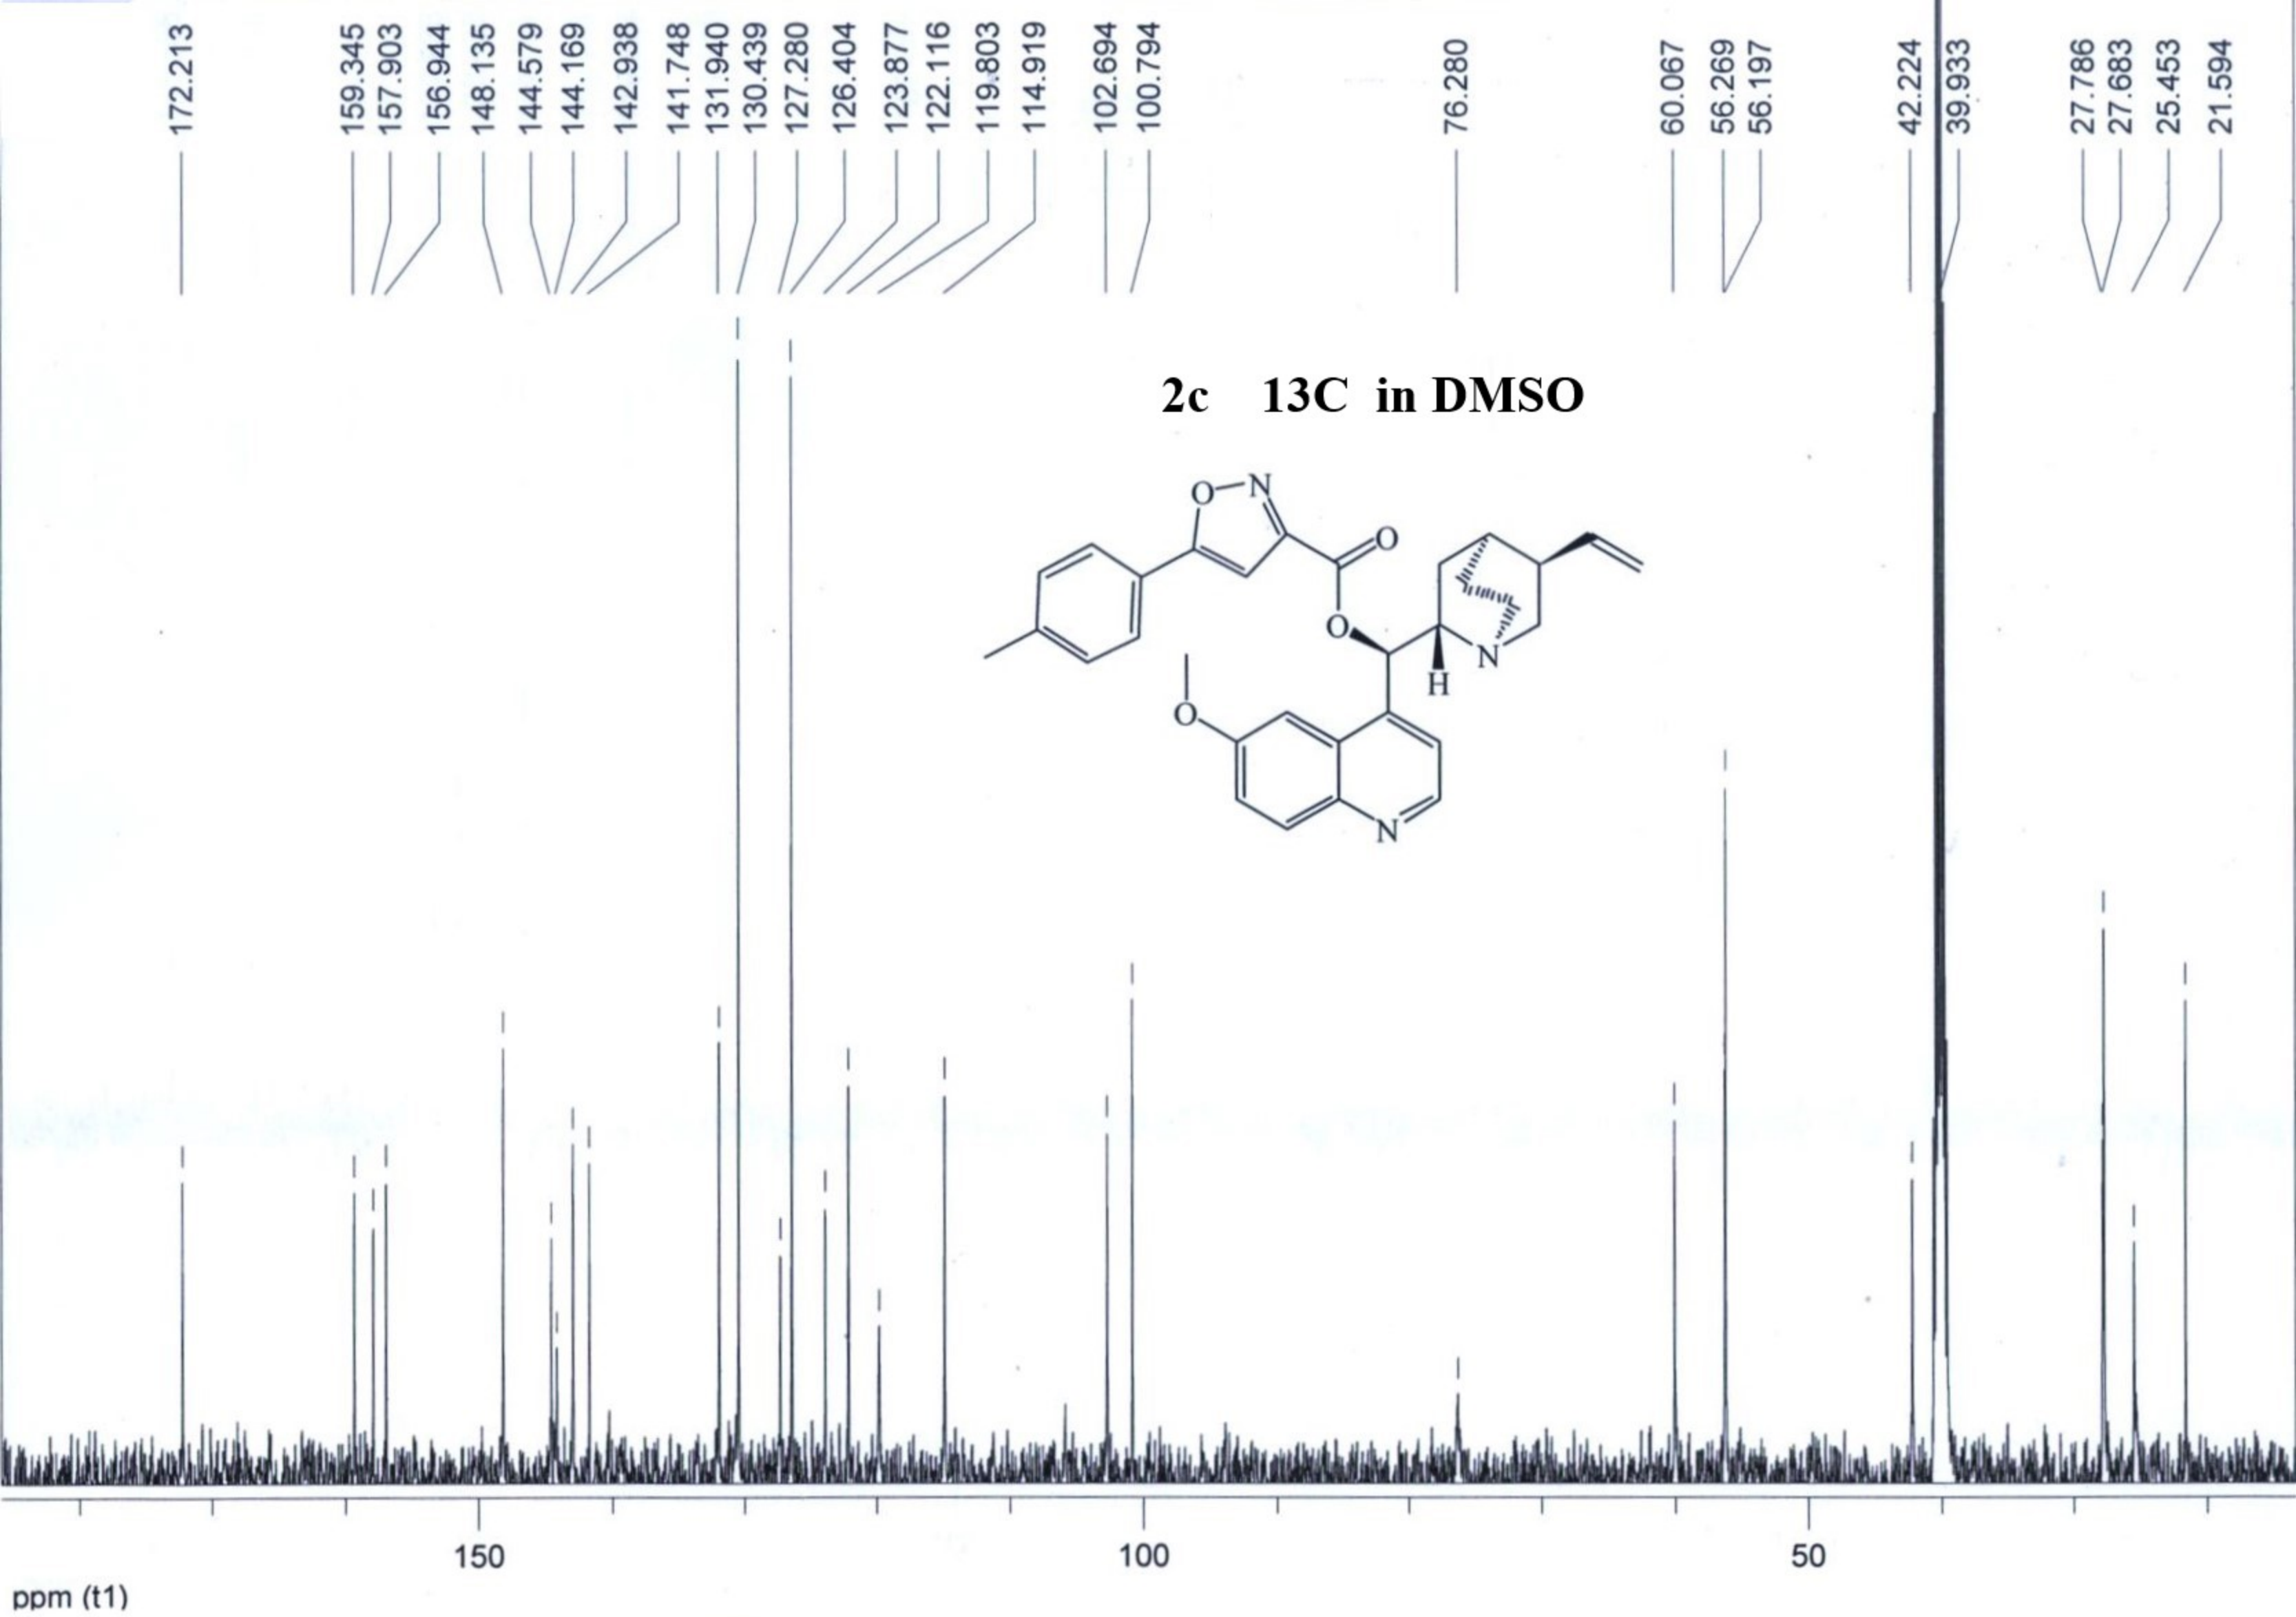

Supplement: s1 [file s1]

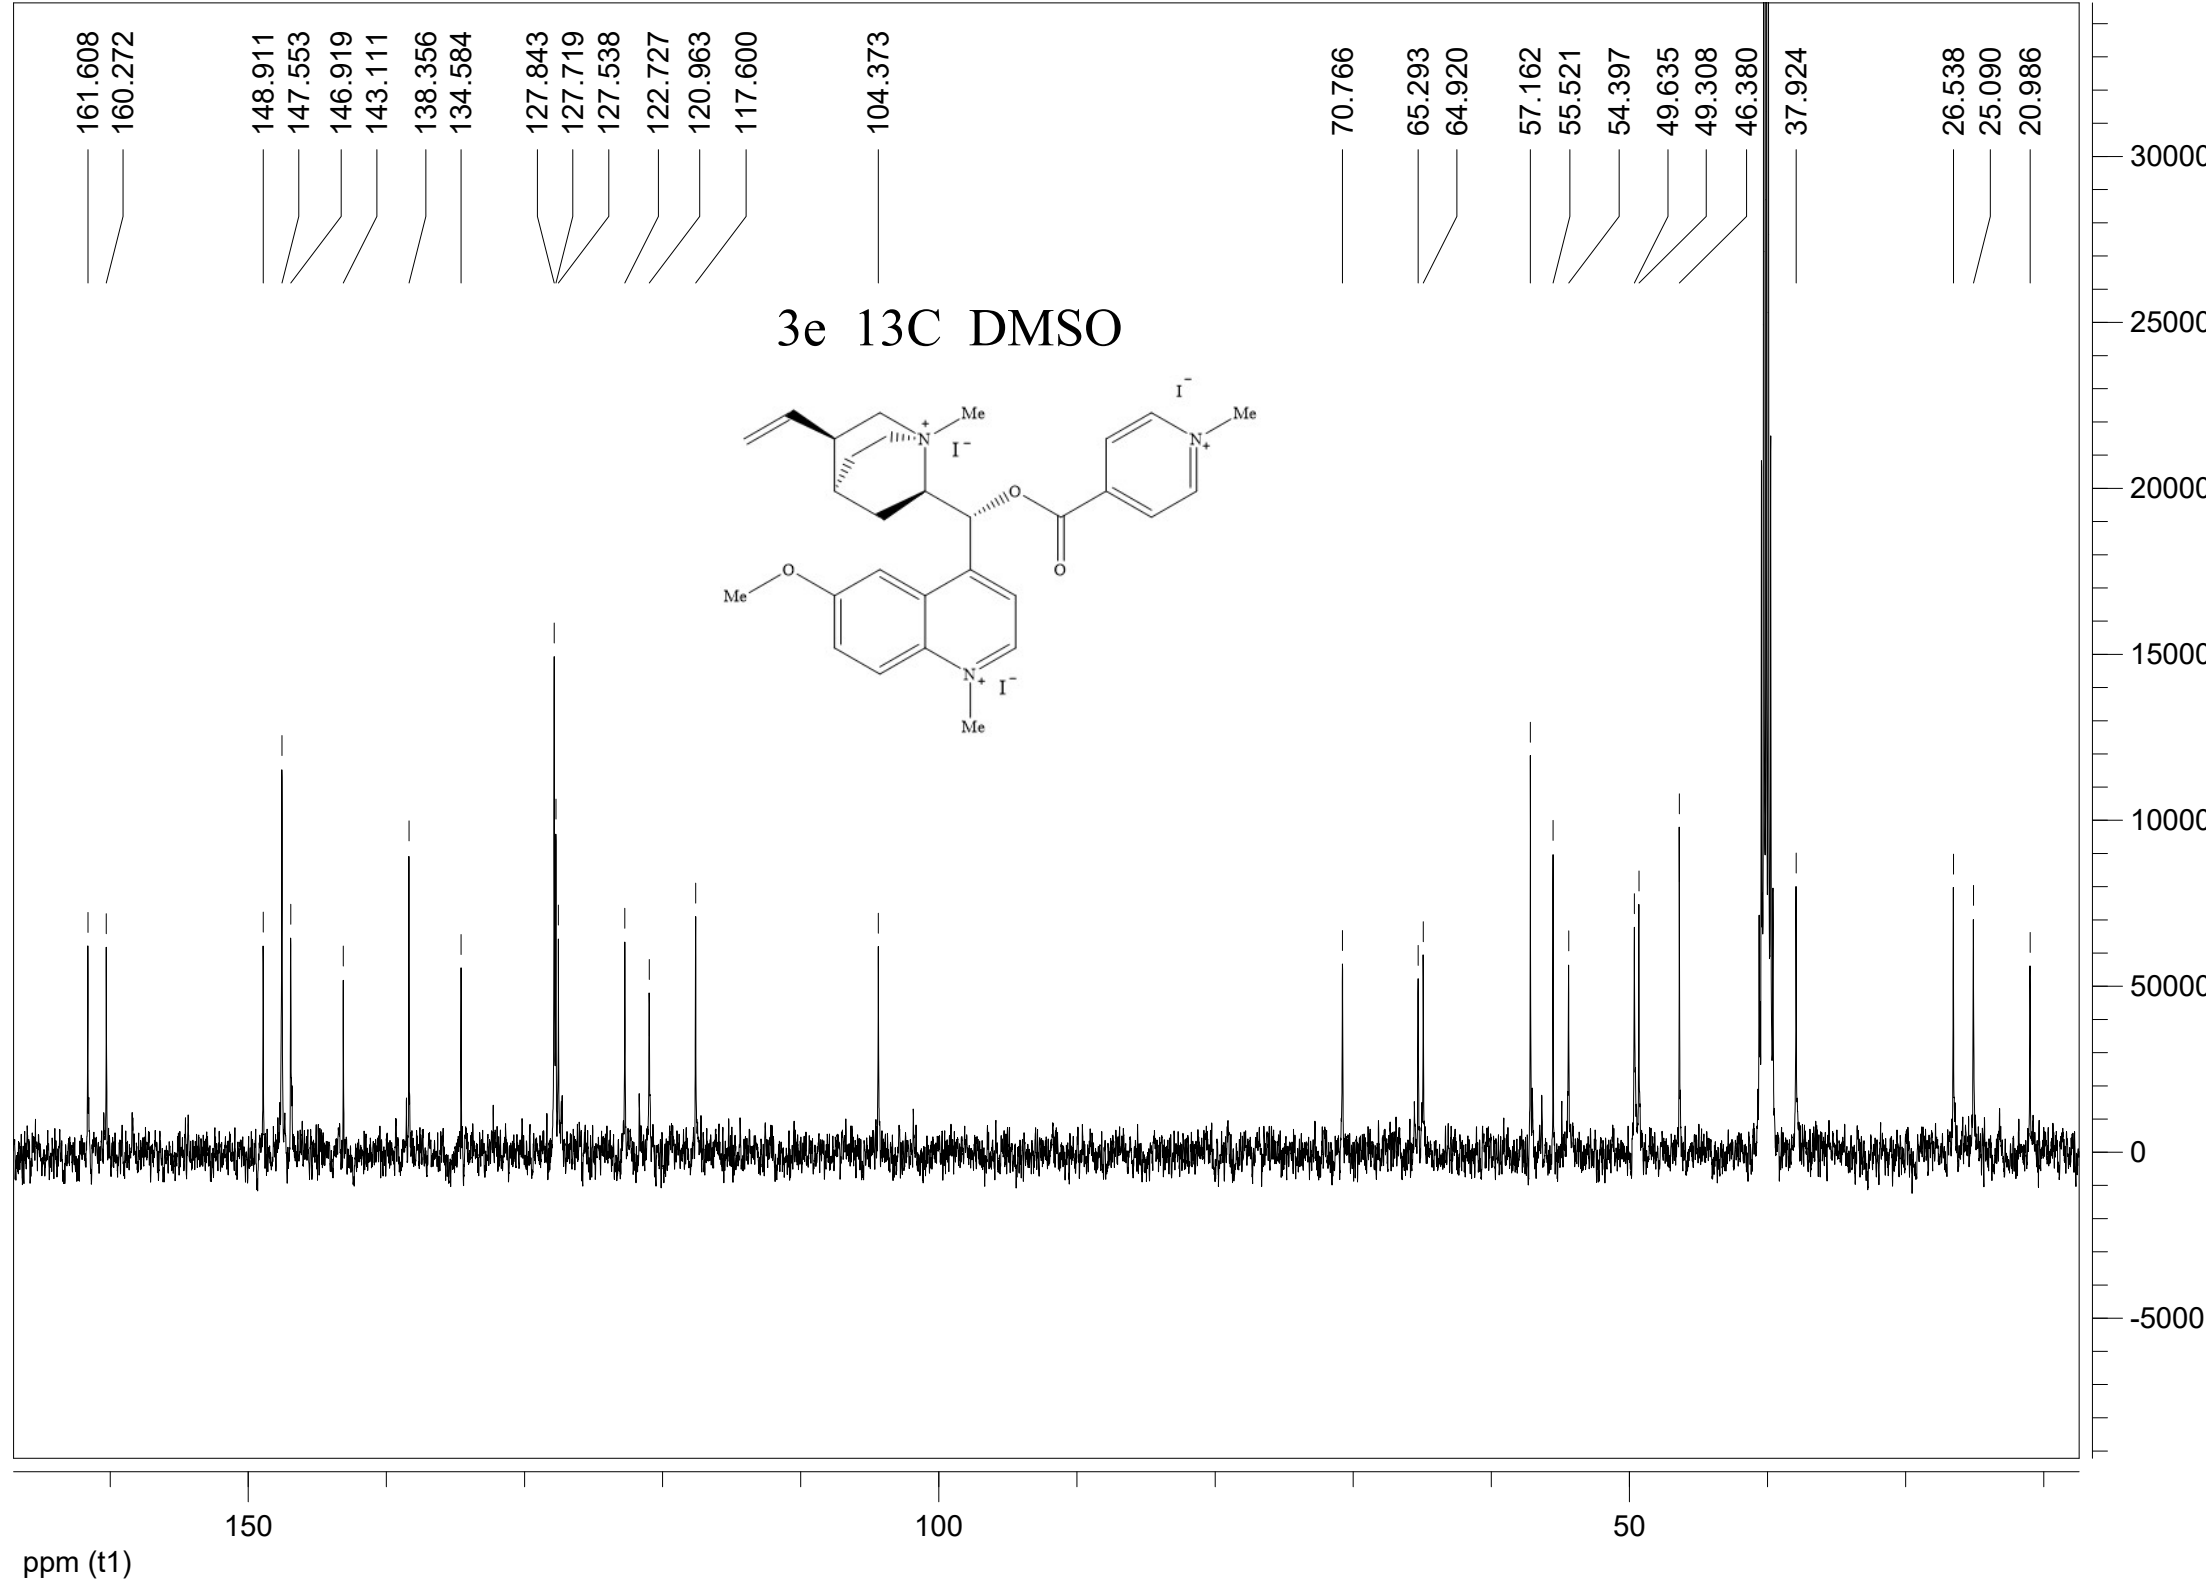

Supplement: s1 [file s1]

**2a <sup>1</sup>H**  
**in DMSO-d6**

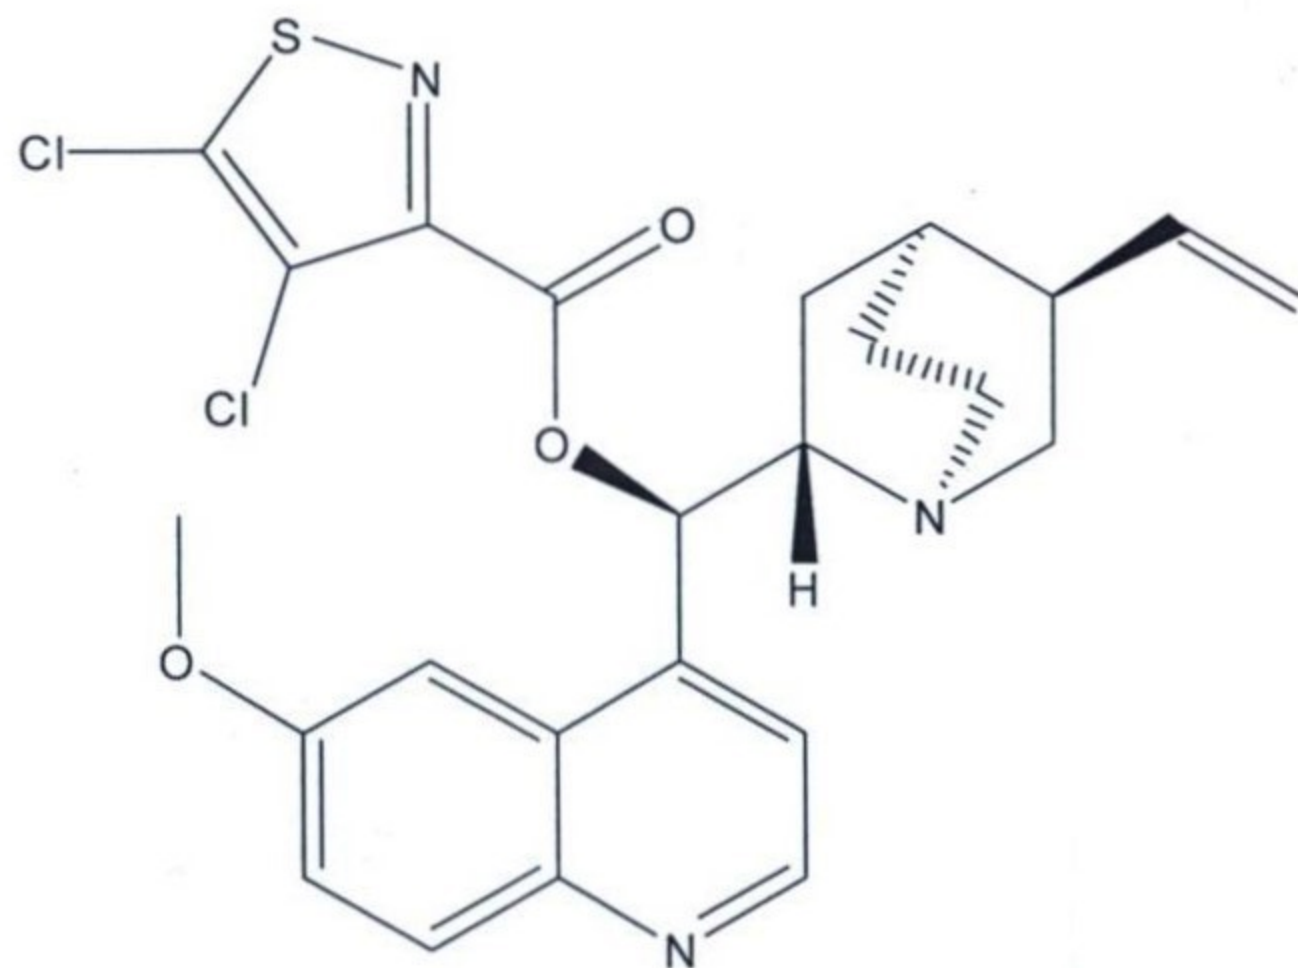

Molecular Weight: 504,43

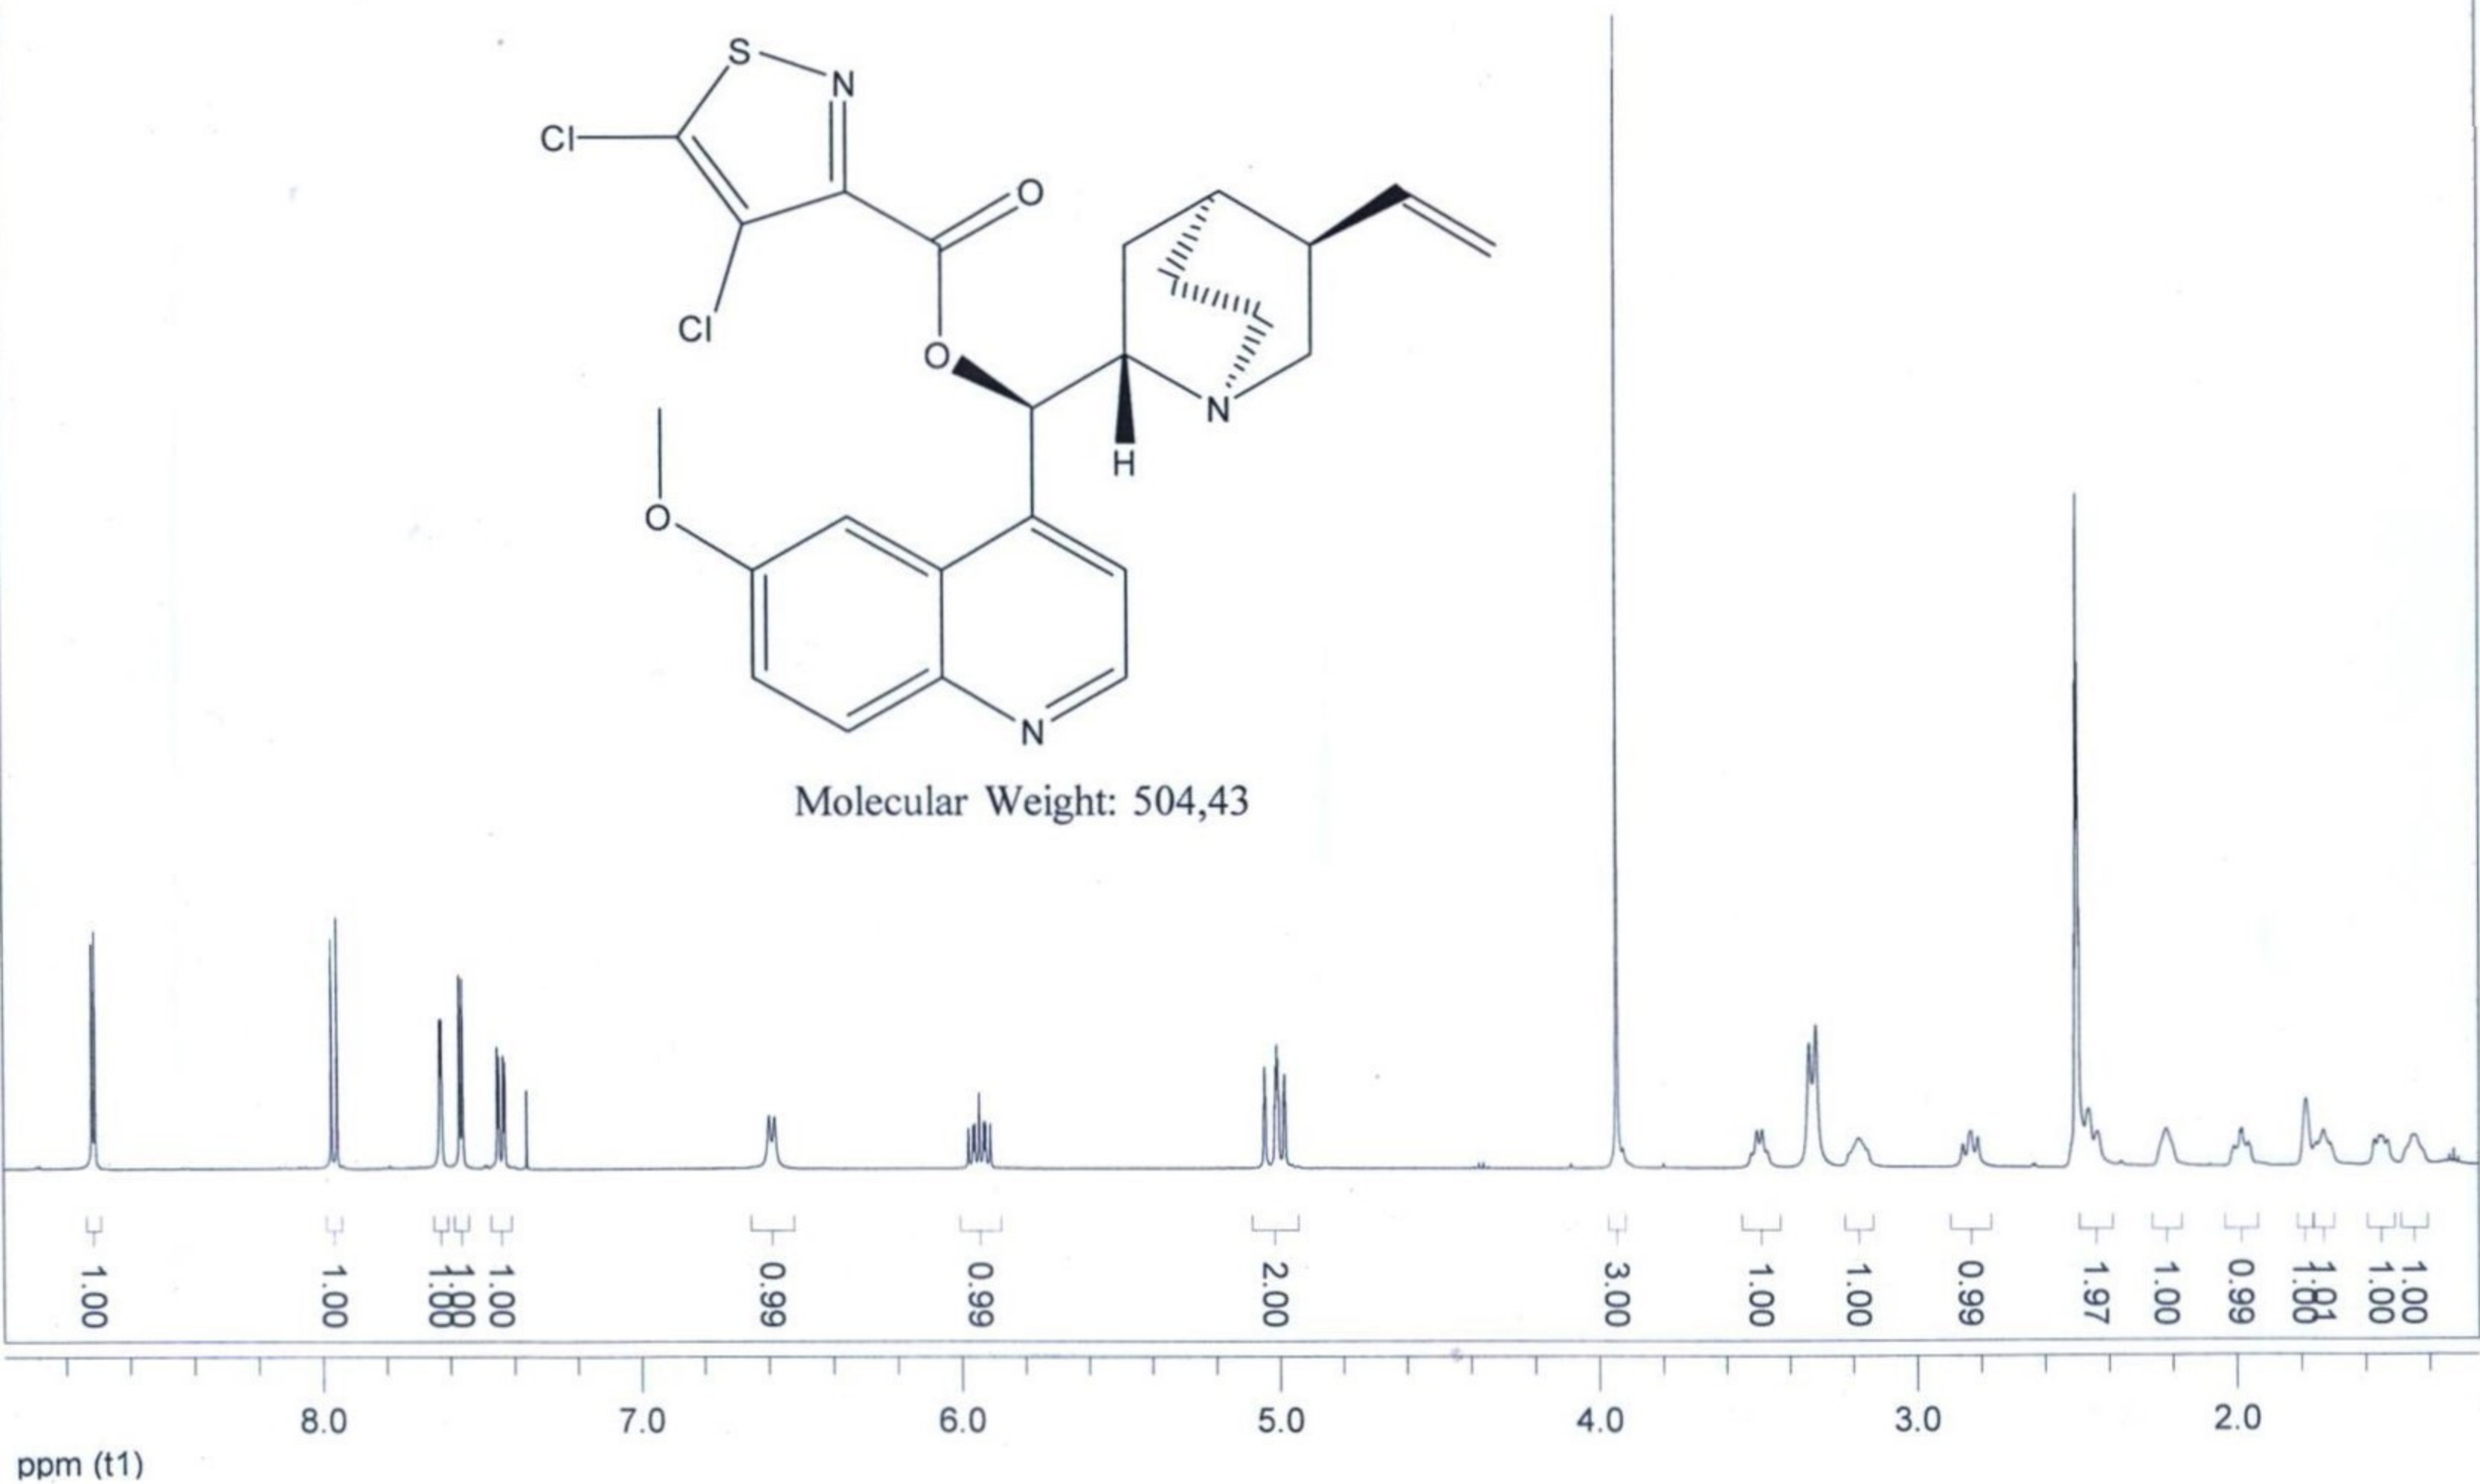

Supplement: s1 [file s1]

**2c 1H**  
**in DMSO-d6**

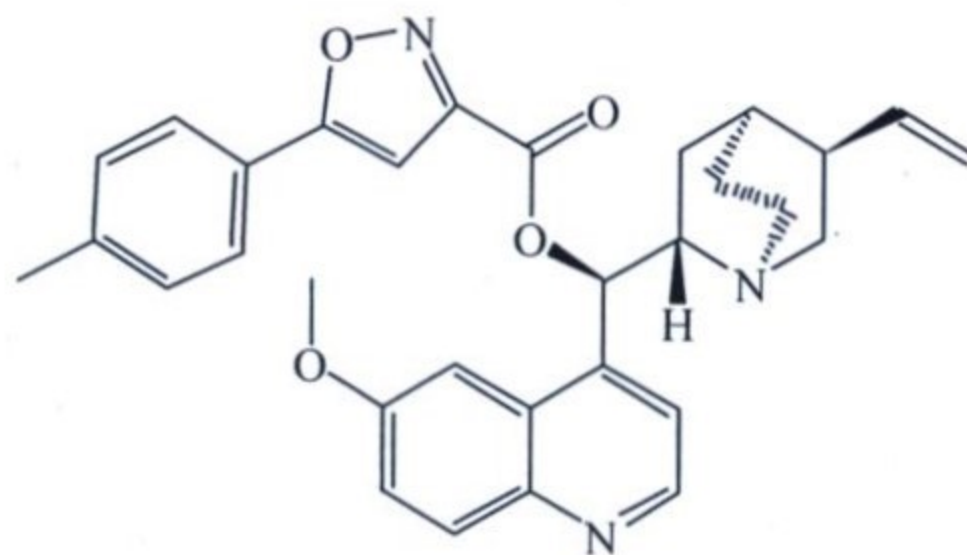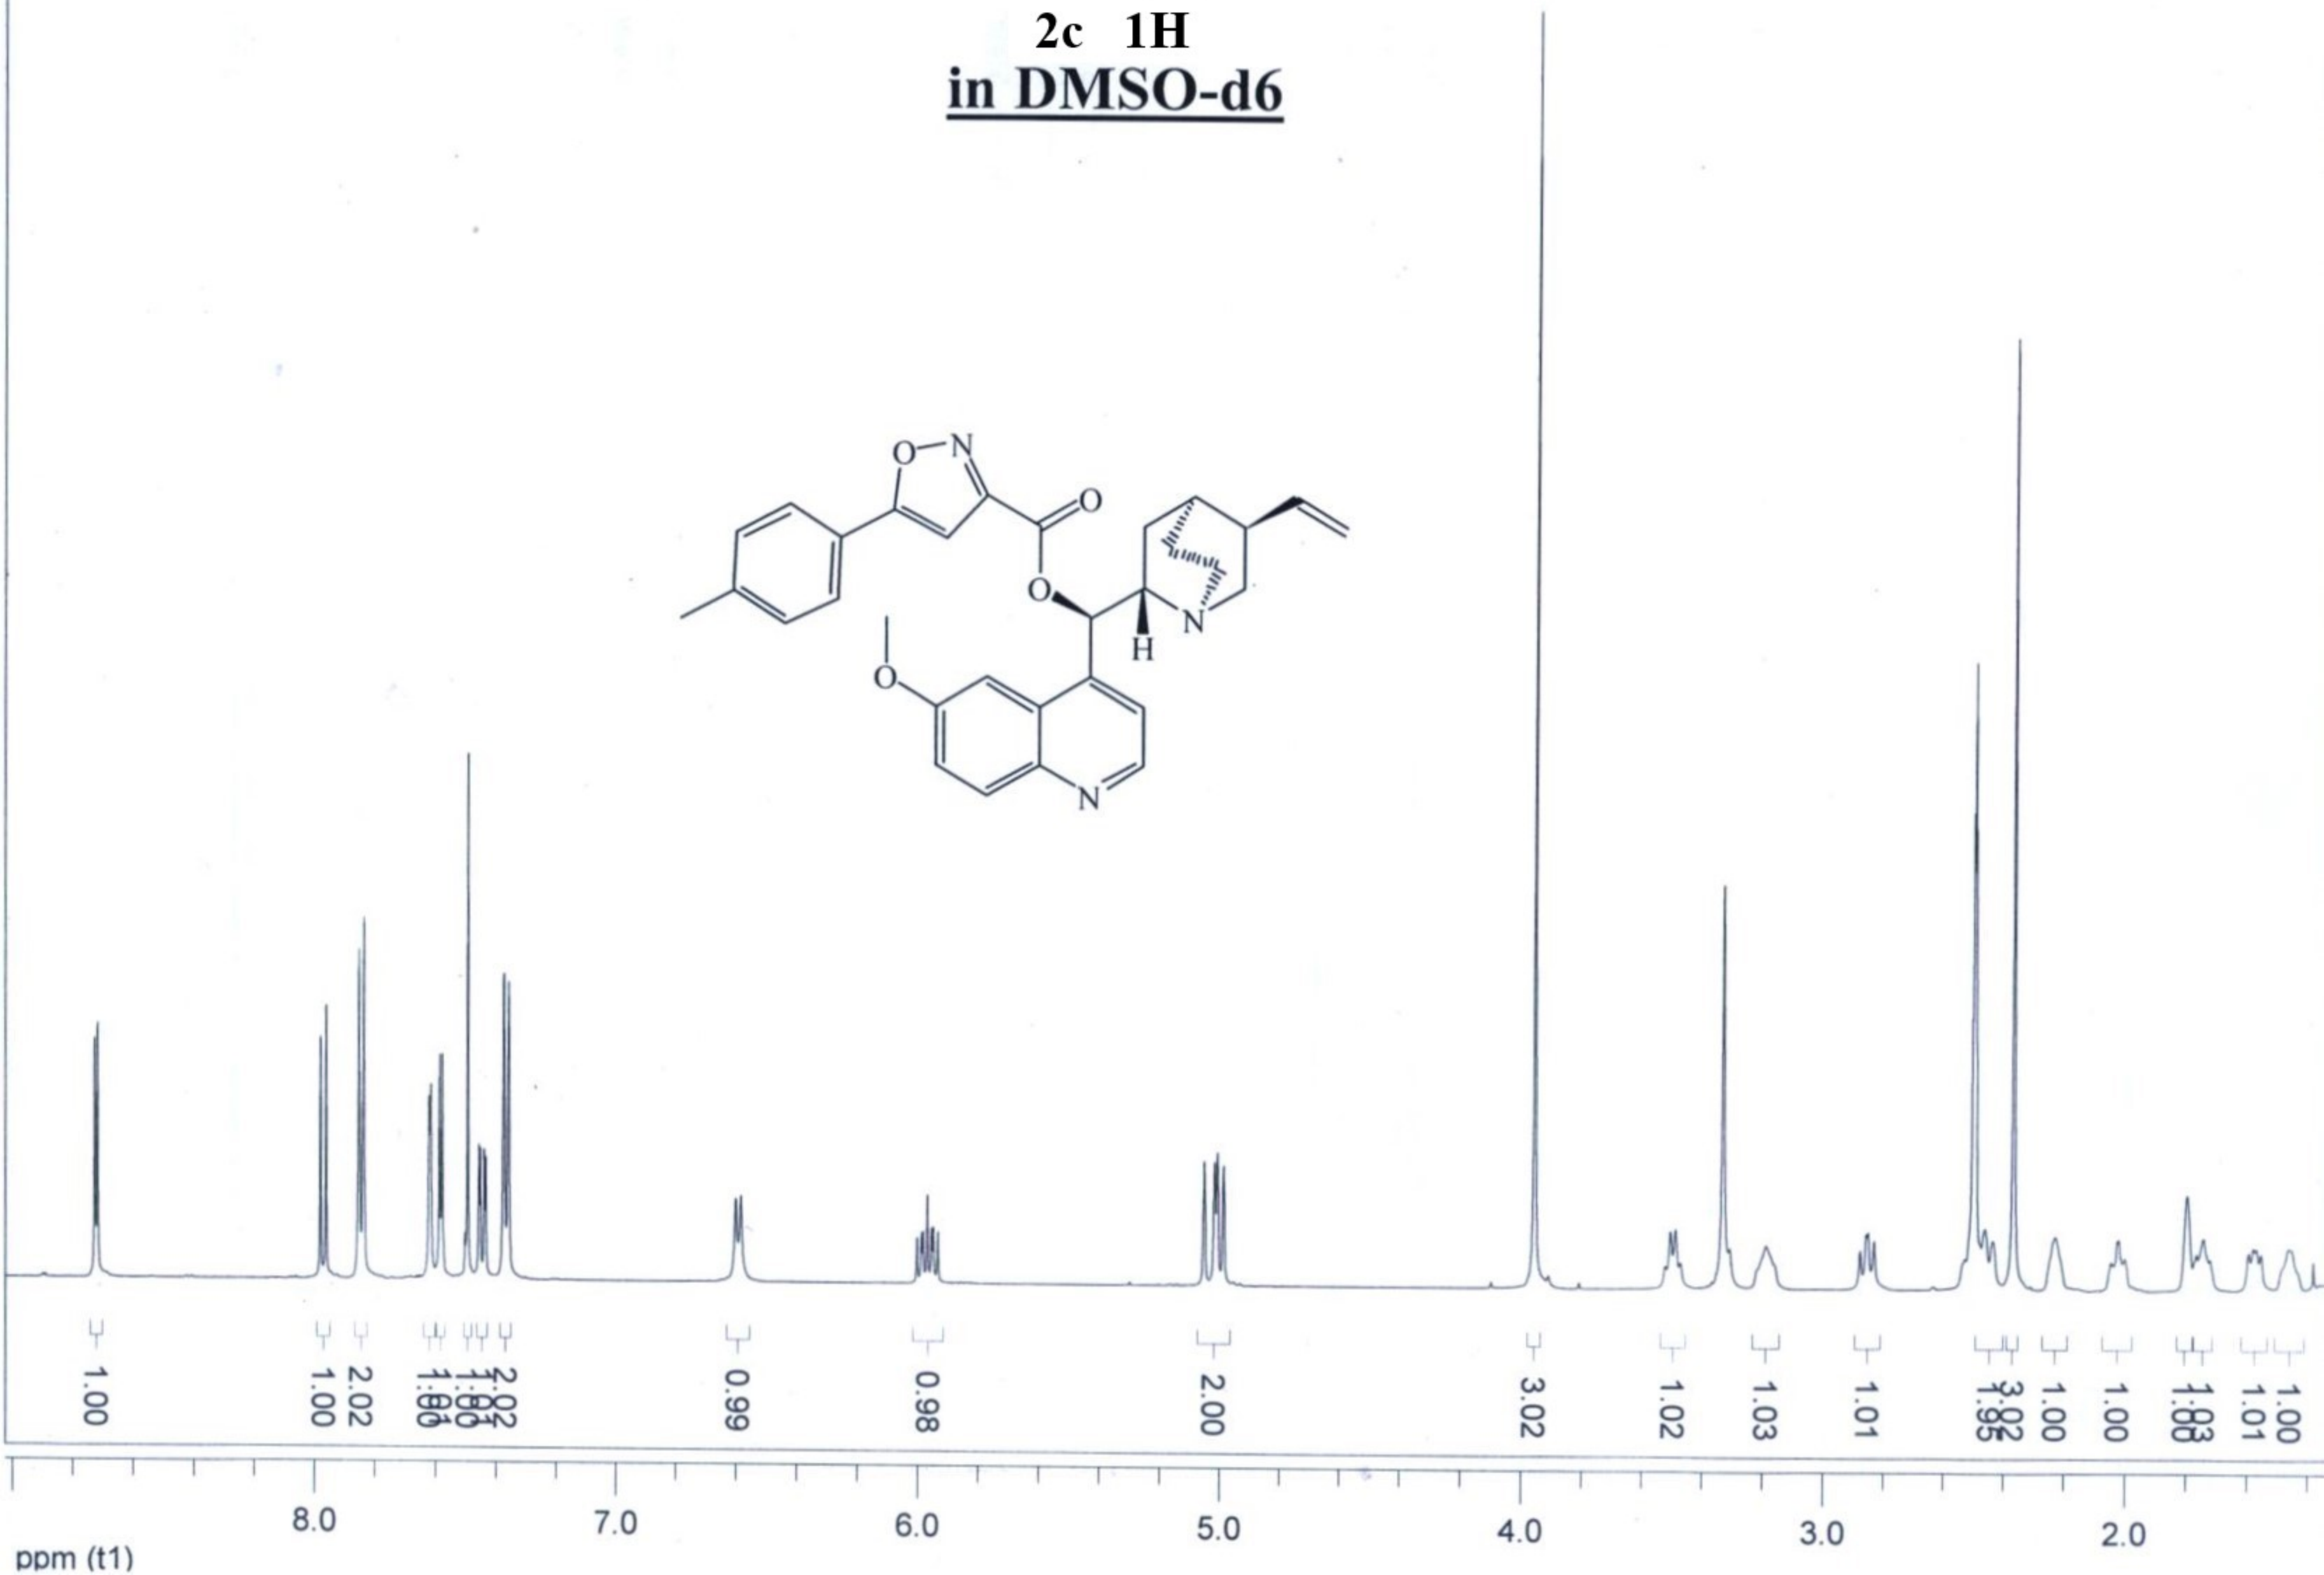

Supplement: s1 [file s1]

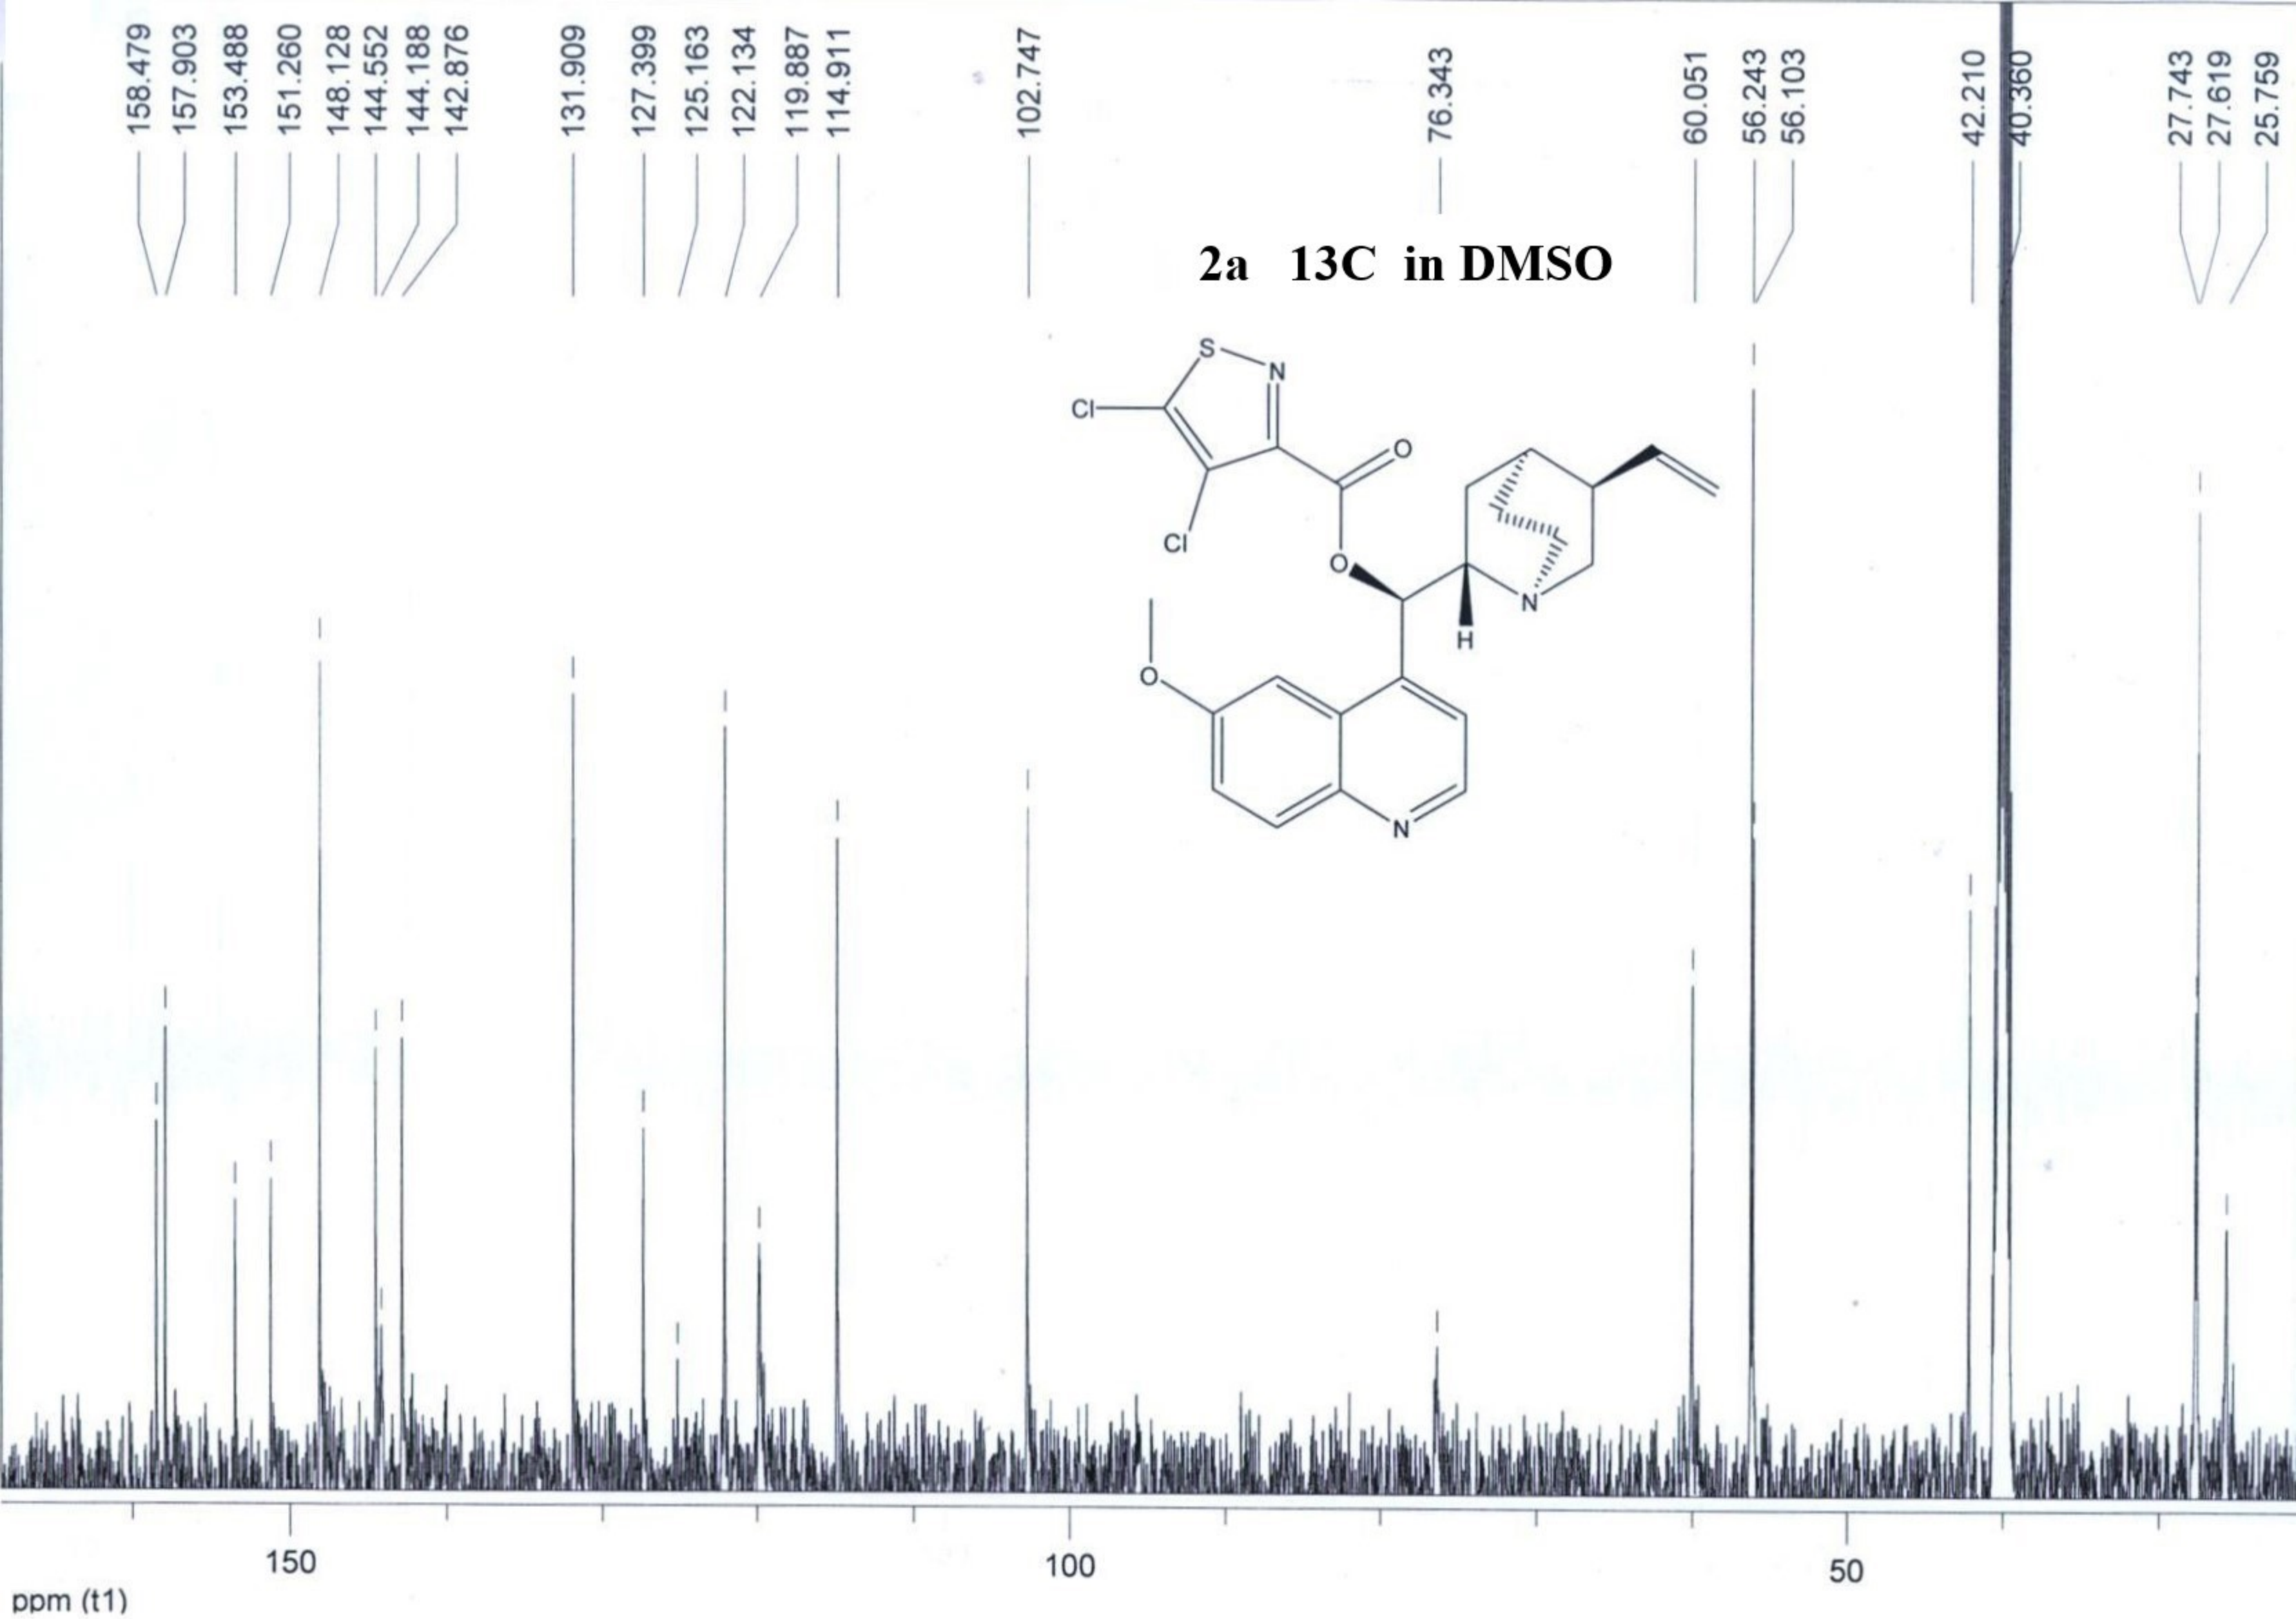

Supplement: s1 [file s1]

# 3d <sup>1</sup>H DMSO

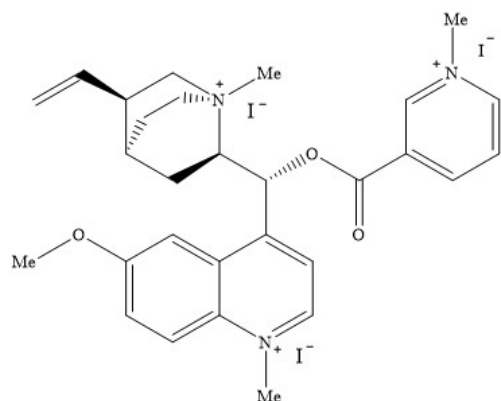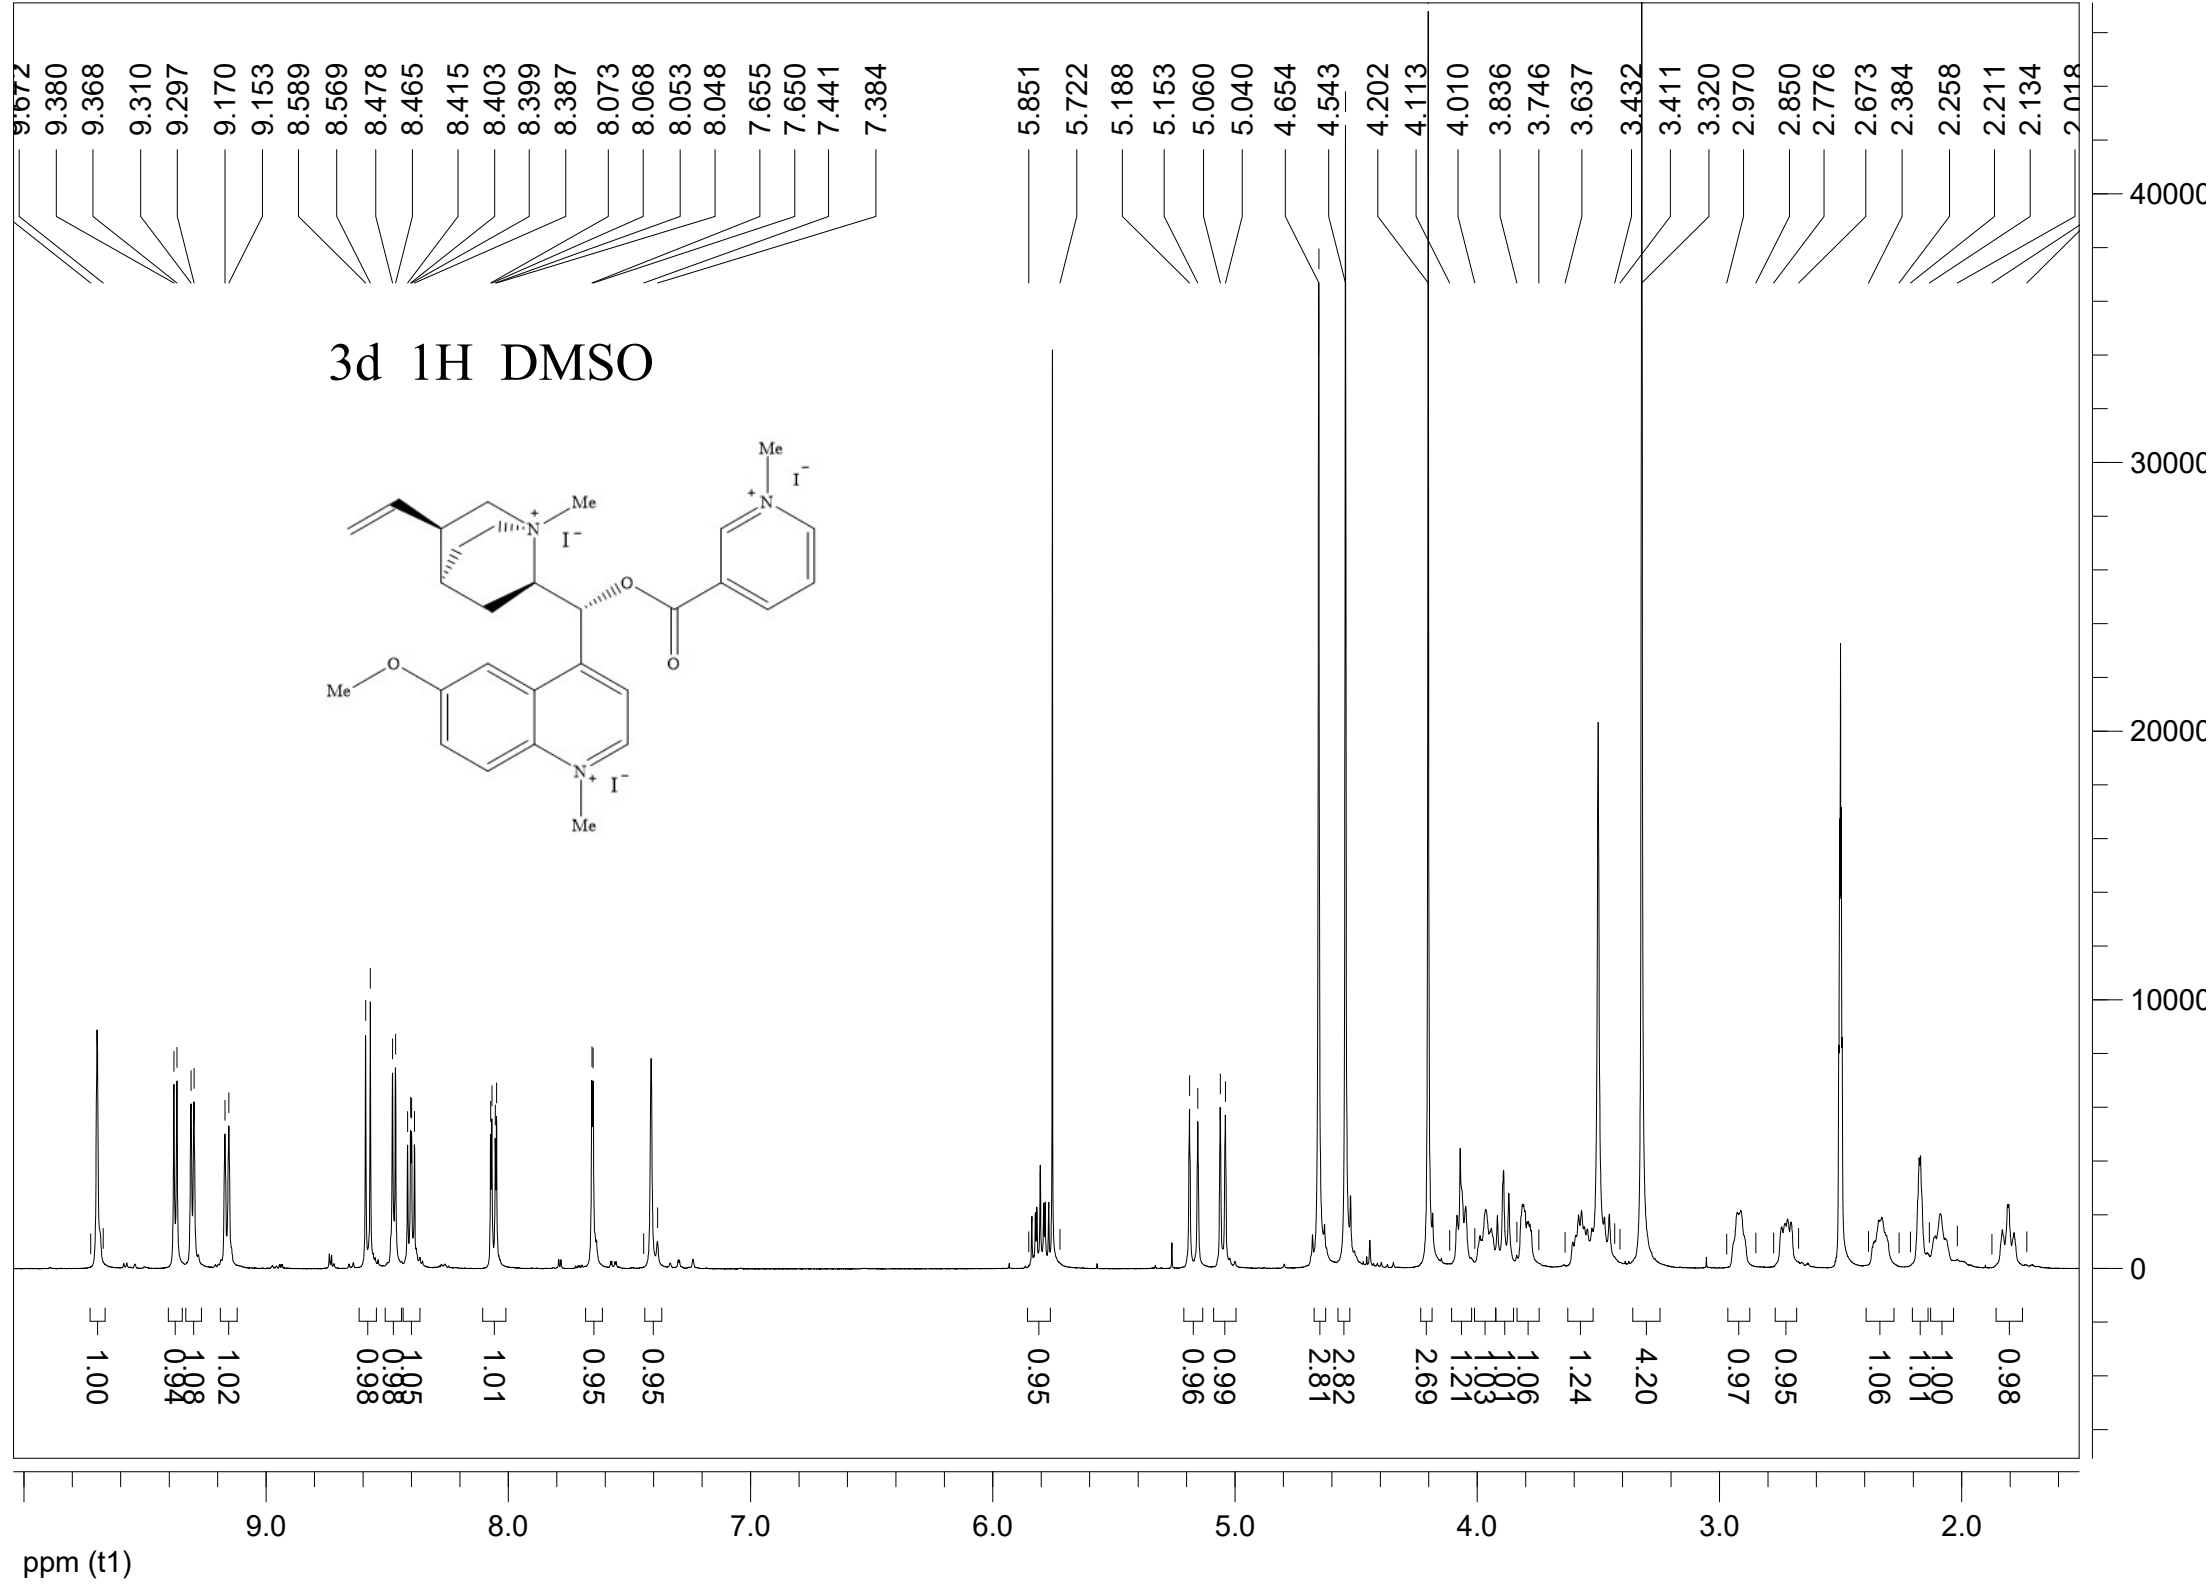

Supplement: s1 [file s1]

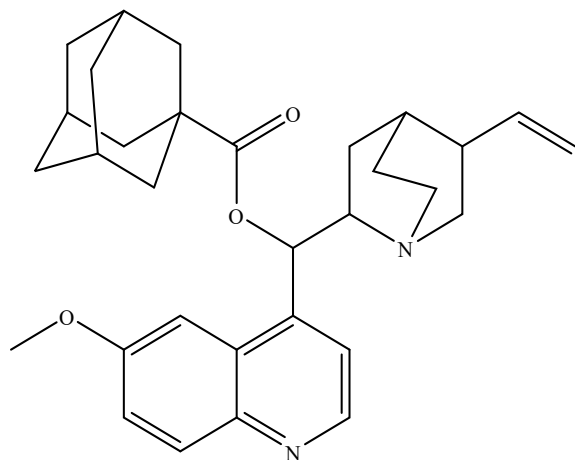

2f <sup>13</sup>C in CDCl<sub>3</sub>

173.560  
157.901  
147.764  
147.711  
144.393  
141.946  
131.705  
126.799  
121.647  
118.638  
114.586  
101.504  
72.095  
60.132  
57.122  
55.859  
43.370  
40.078  
39.002  
38.437  
36.710  
36.573  
36.476  
28.024  
27.842  
27.765  
21.988

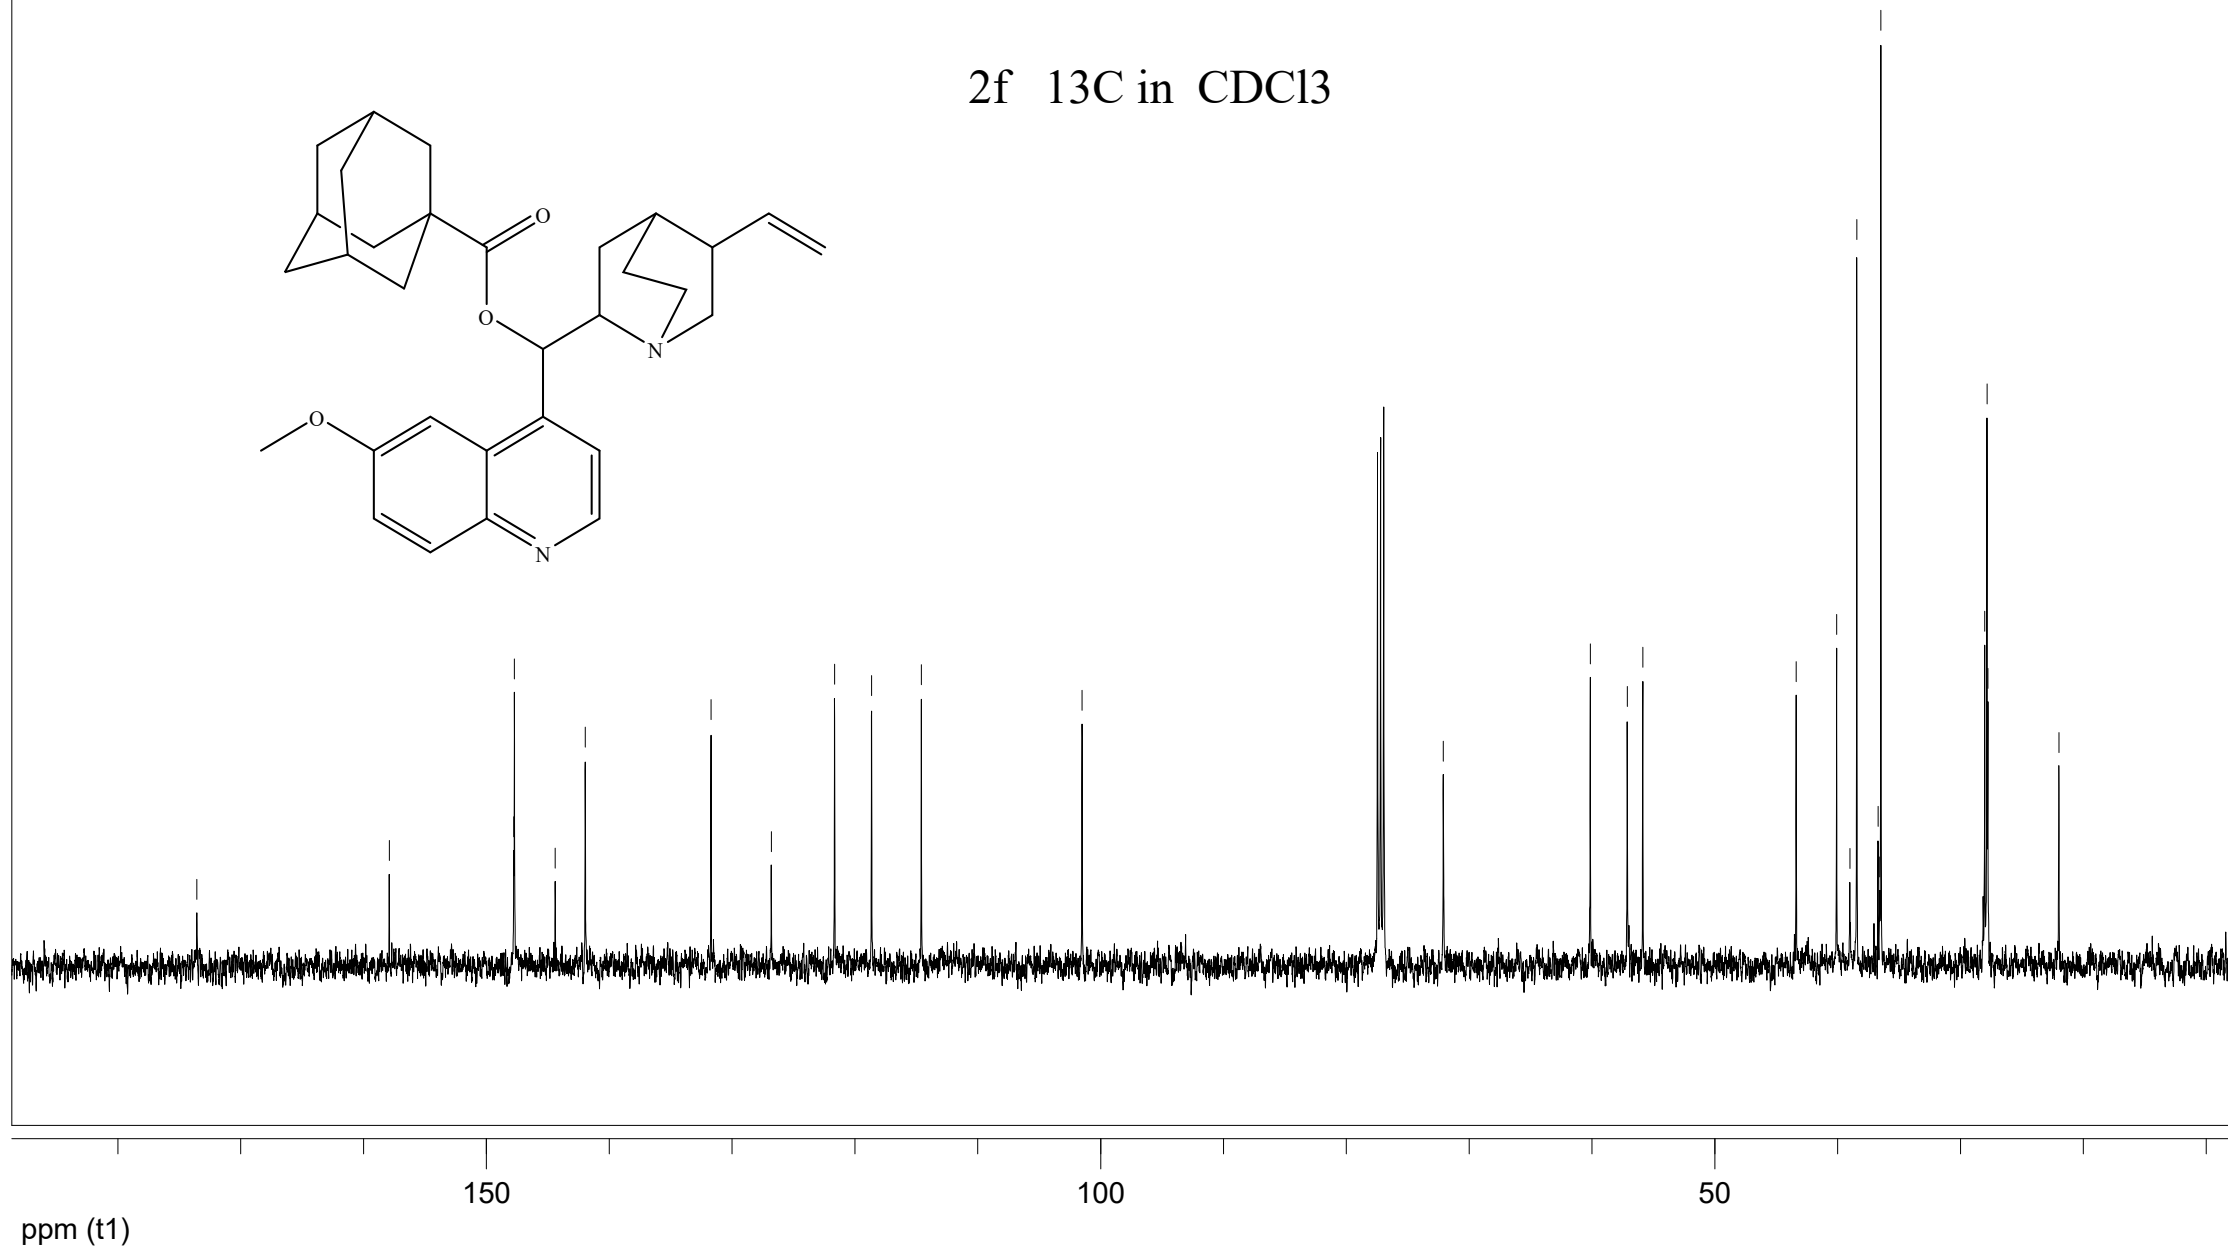

Supplement: s1 [file s1]

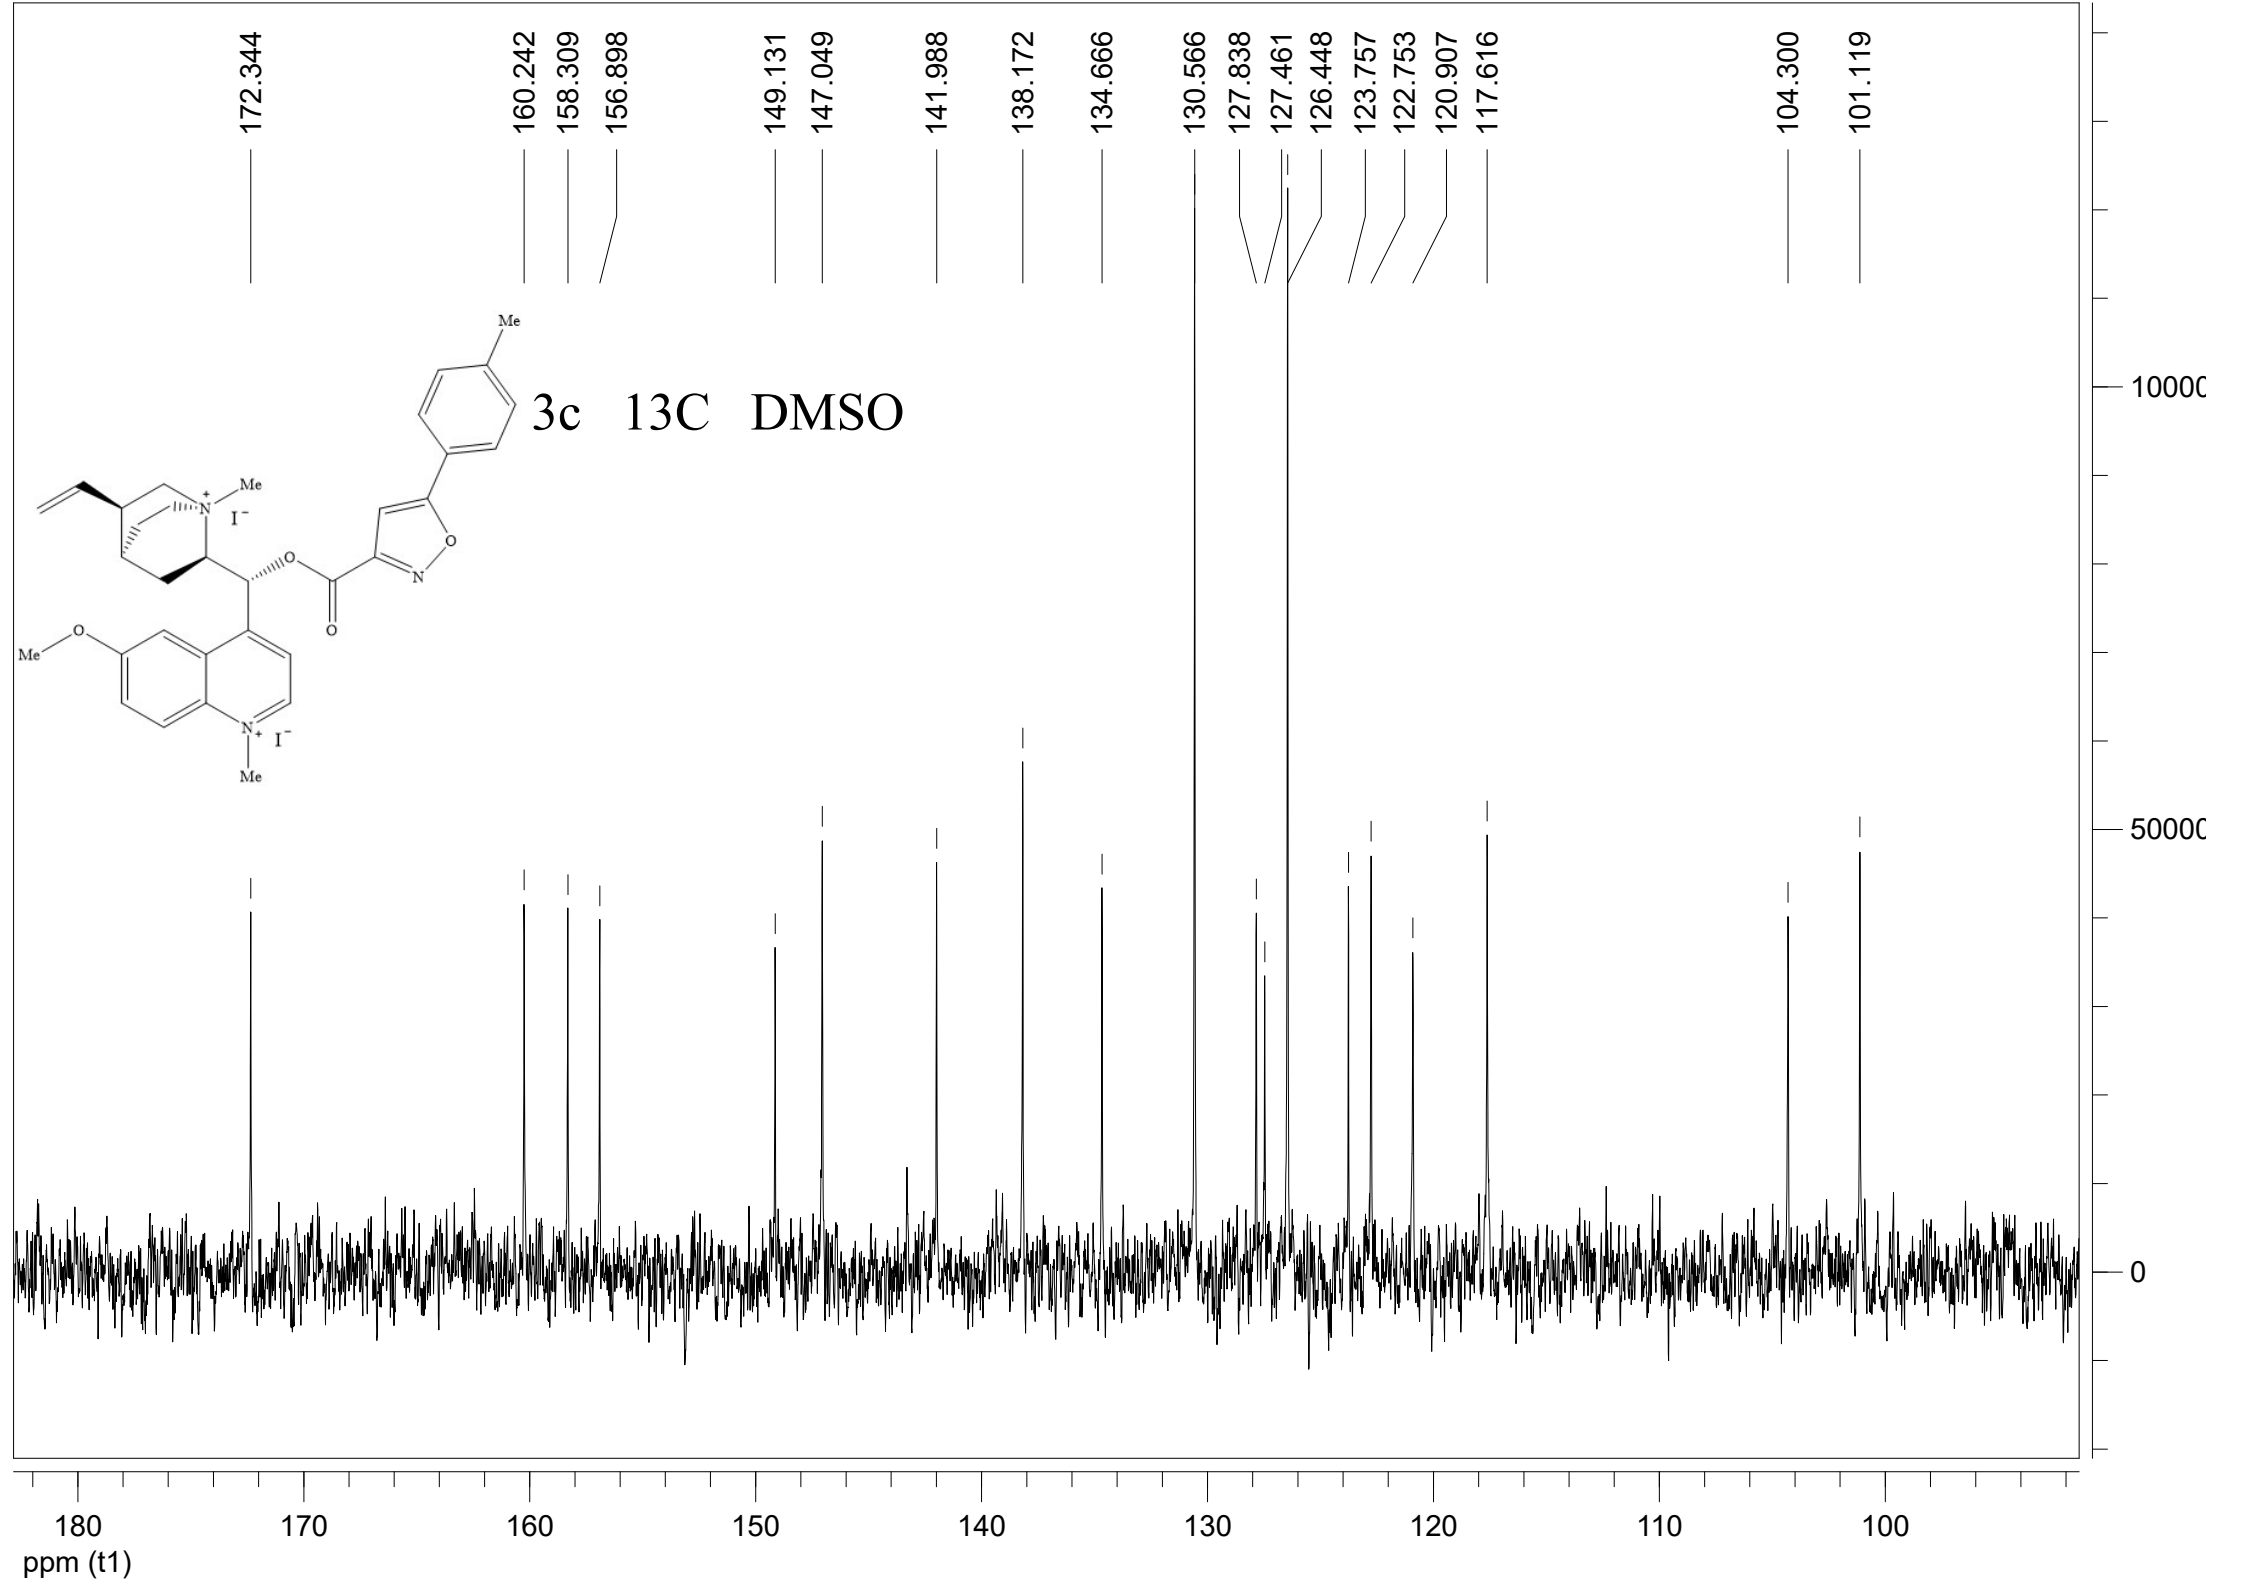

Supplement: s1 [file s1]

2f <sup>1</sup>H in CDCl<sub>3</sub>

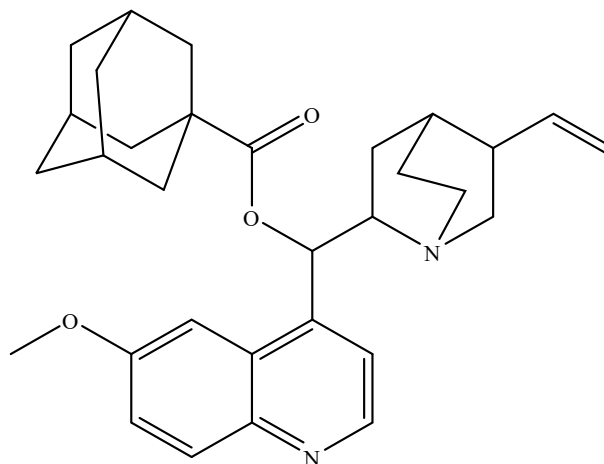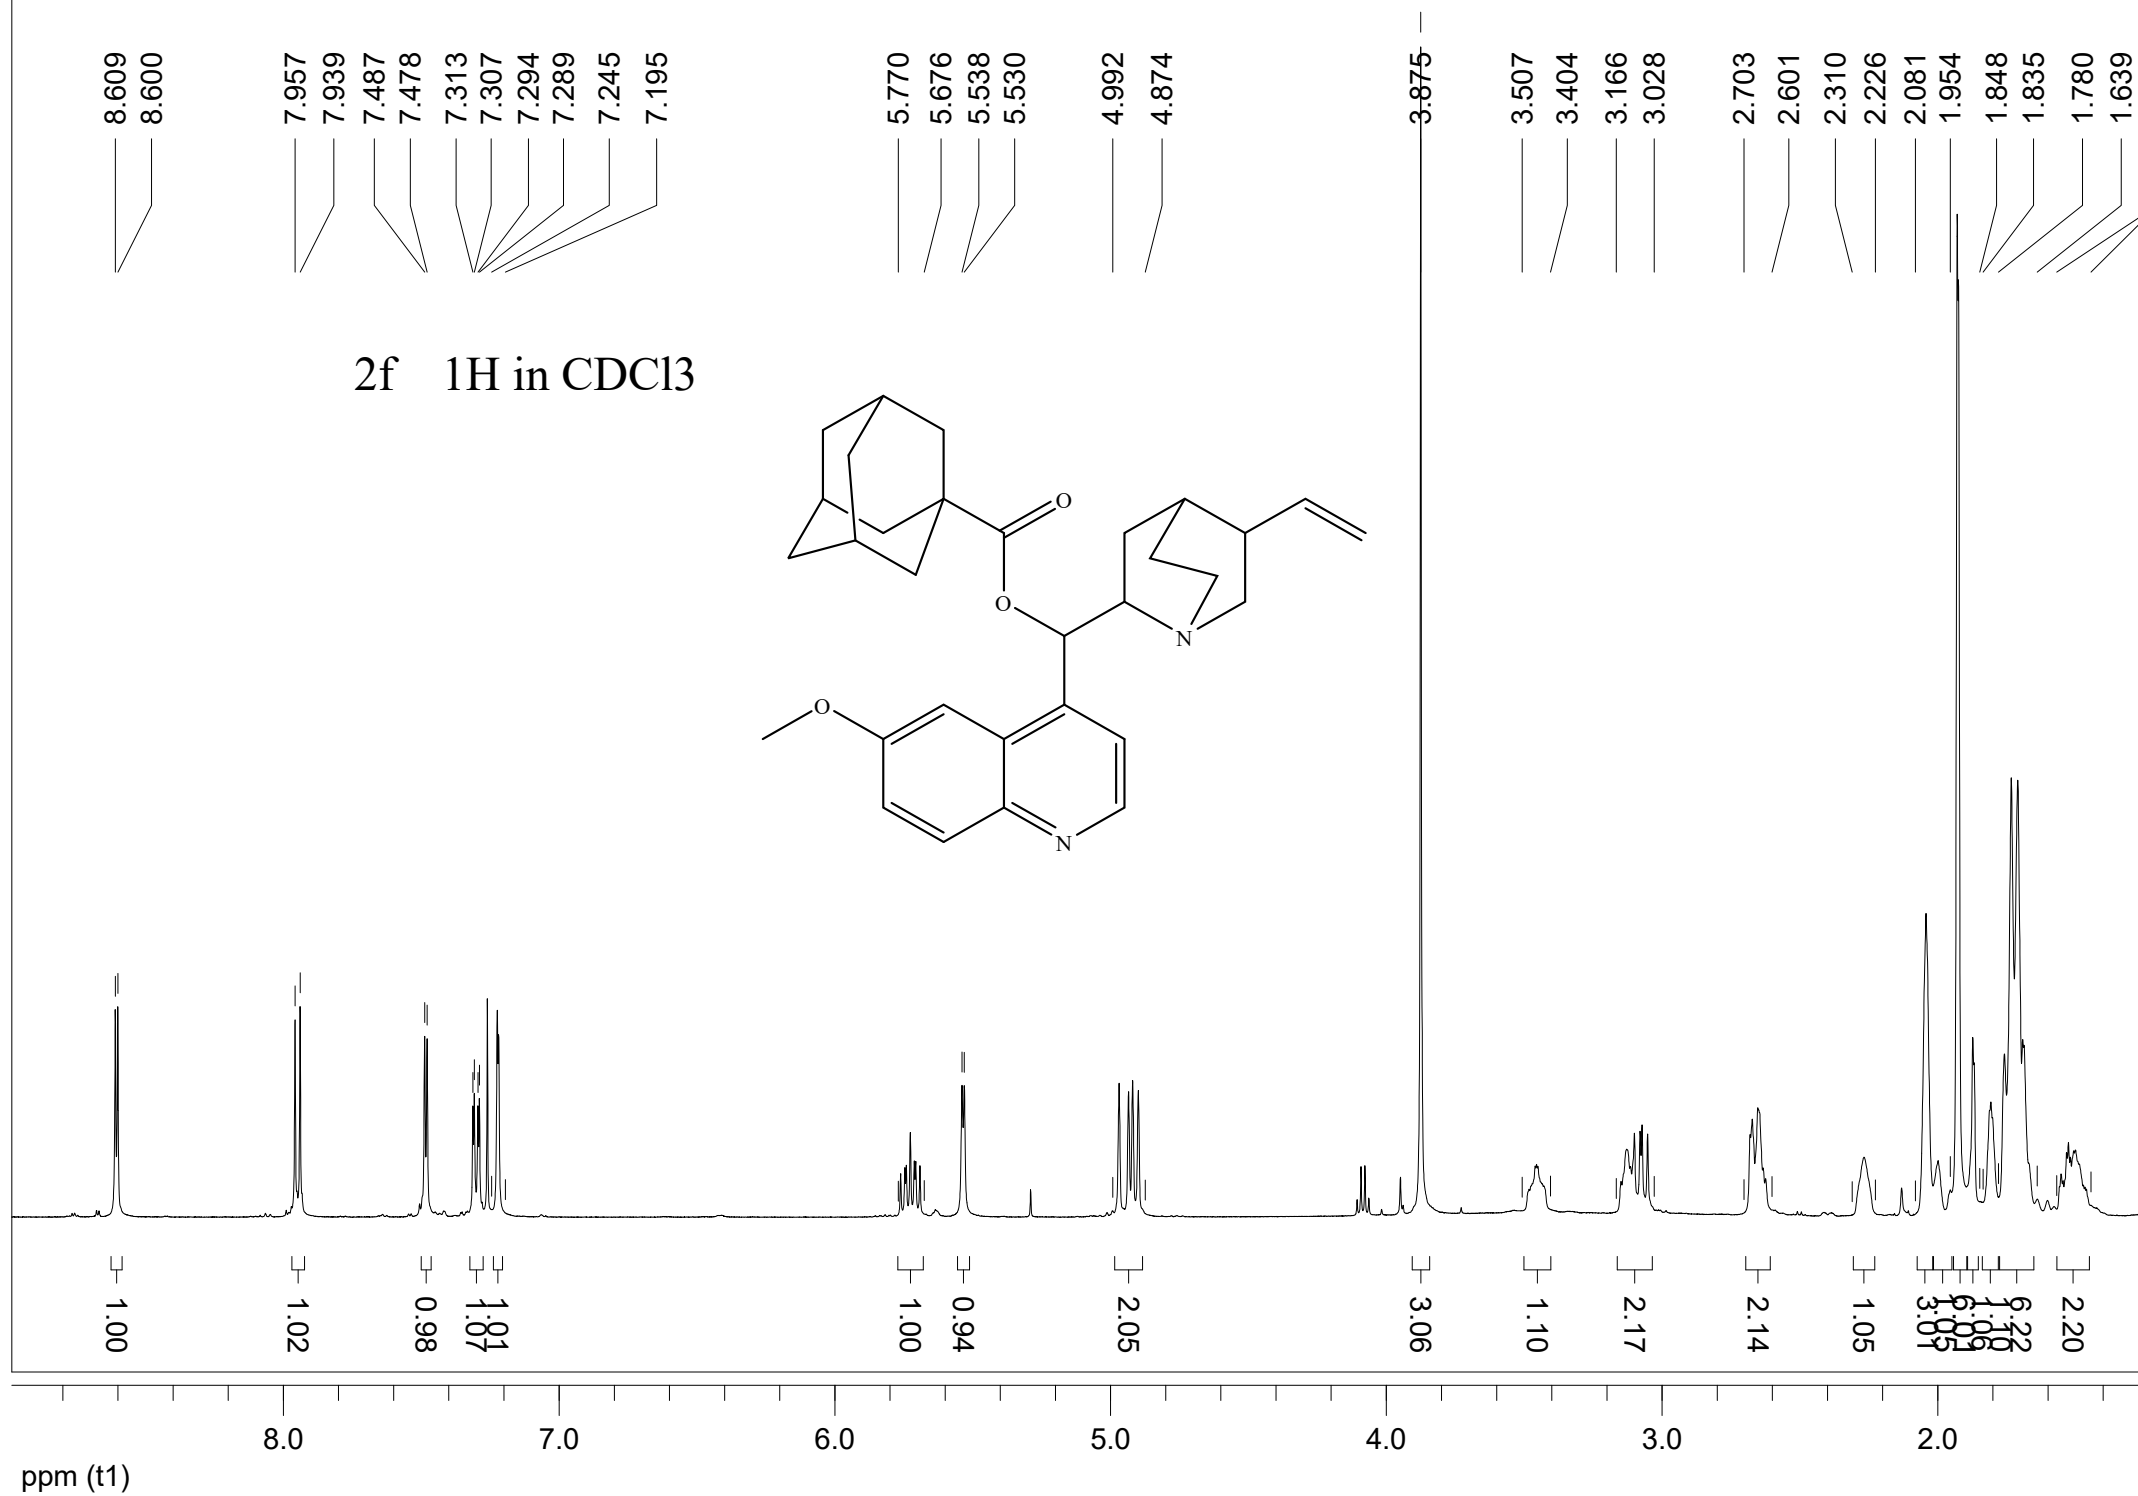

Supplement: s1 [file s1]

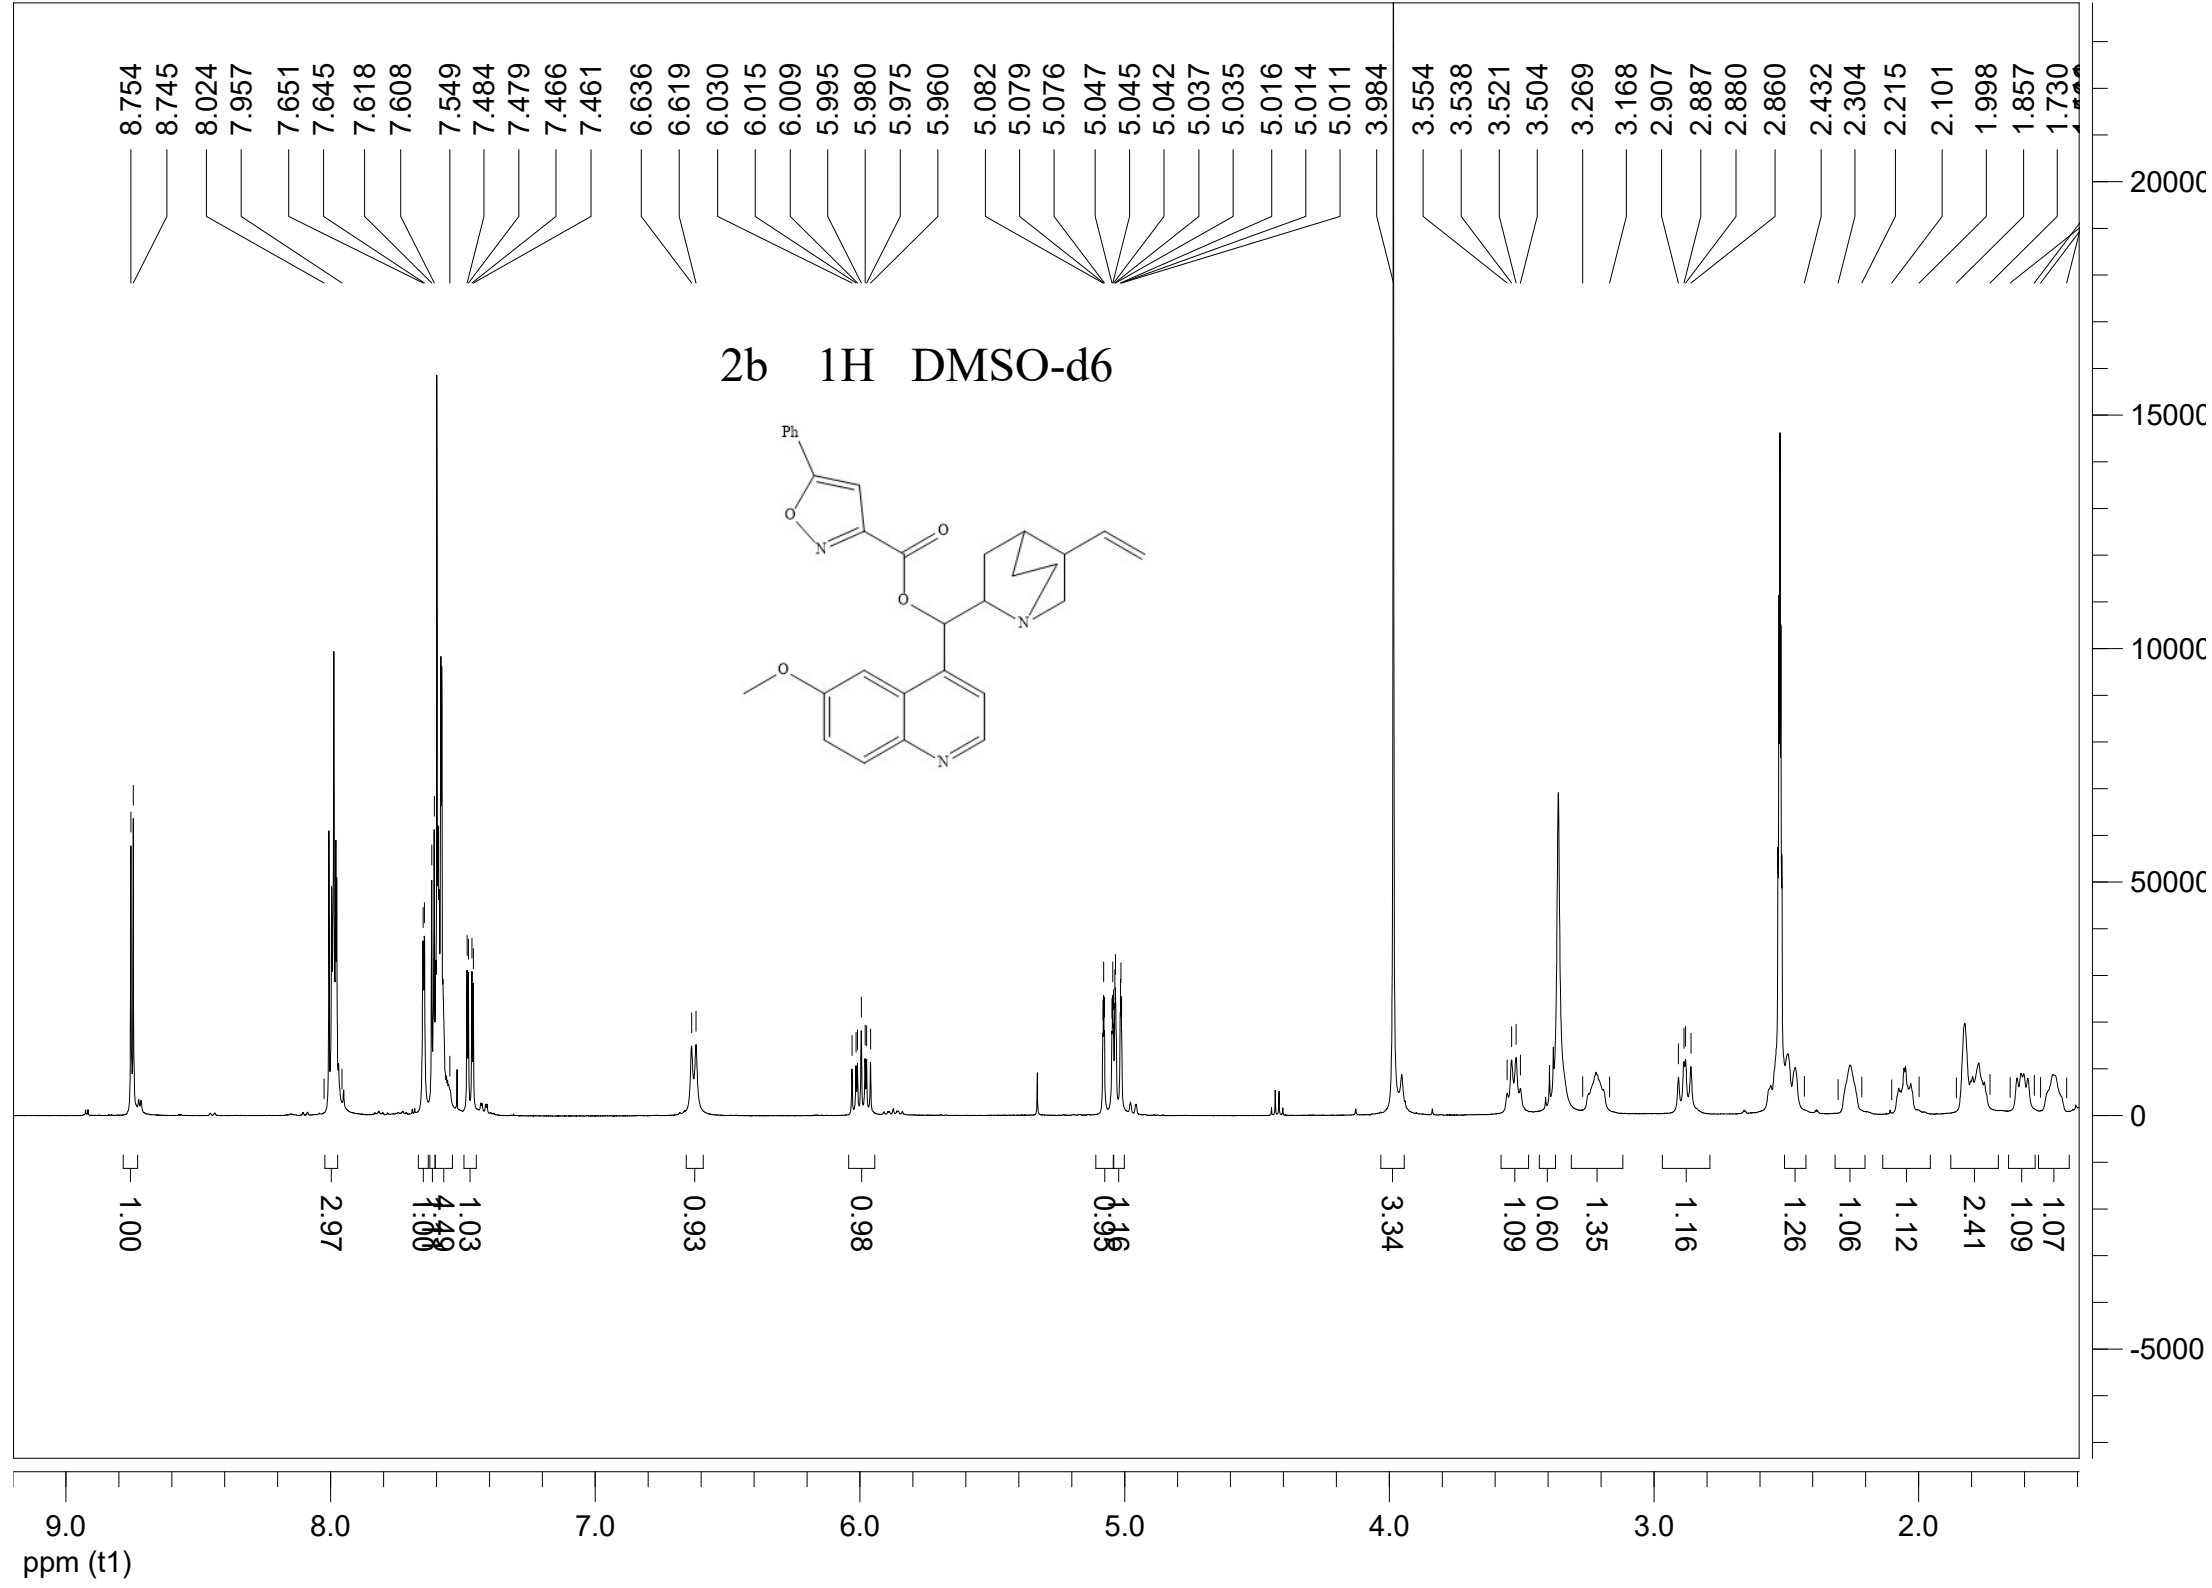

Supplement: s1 [file s1]

# 3a <sup>1</sup>H DMSO

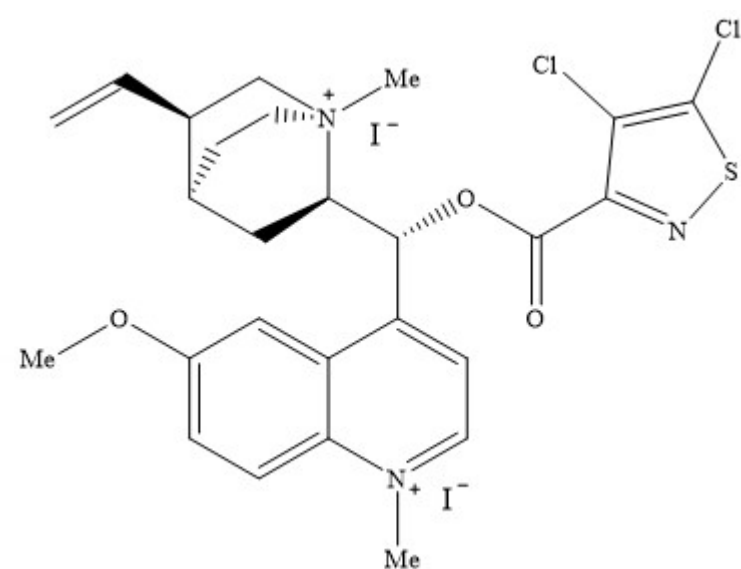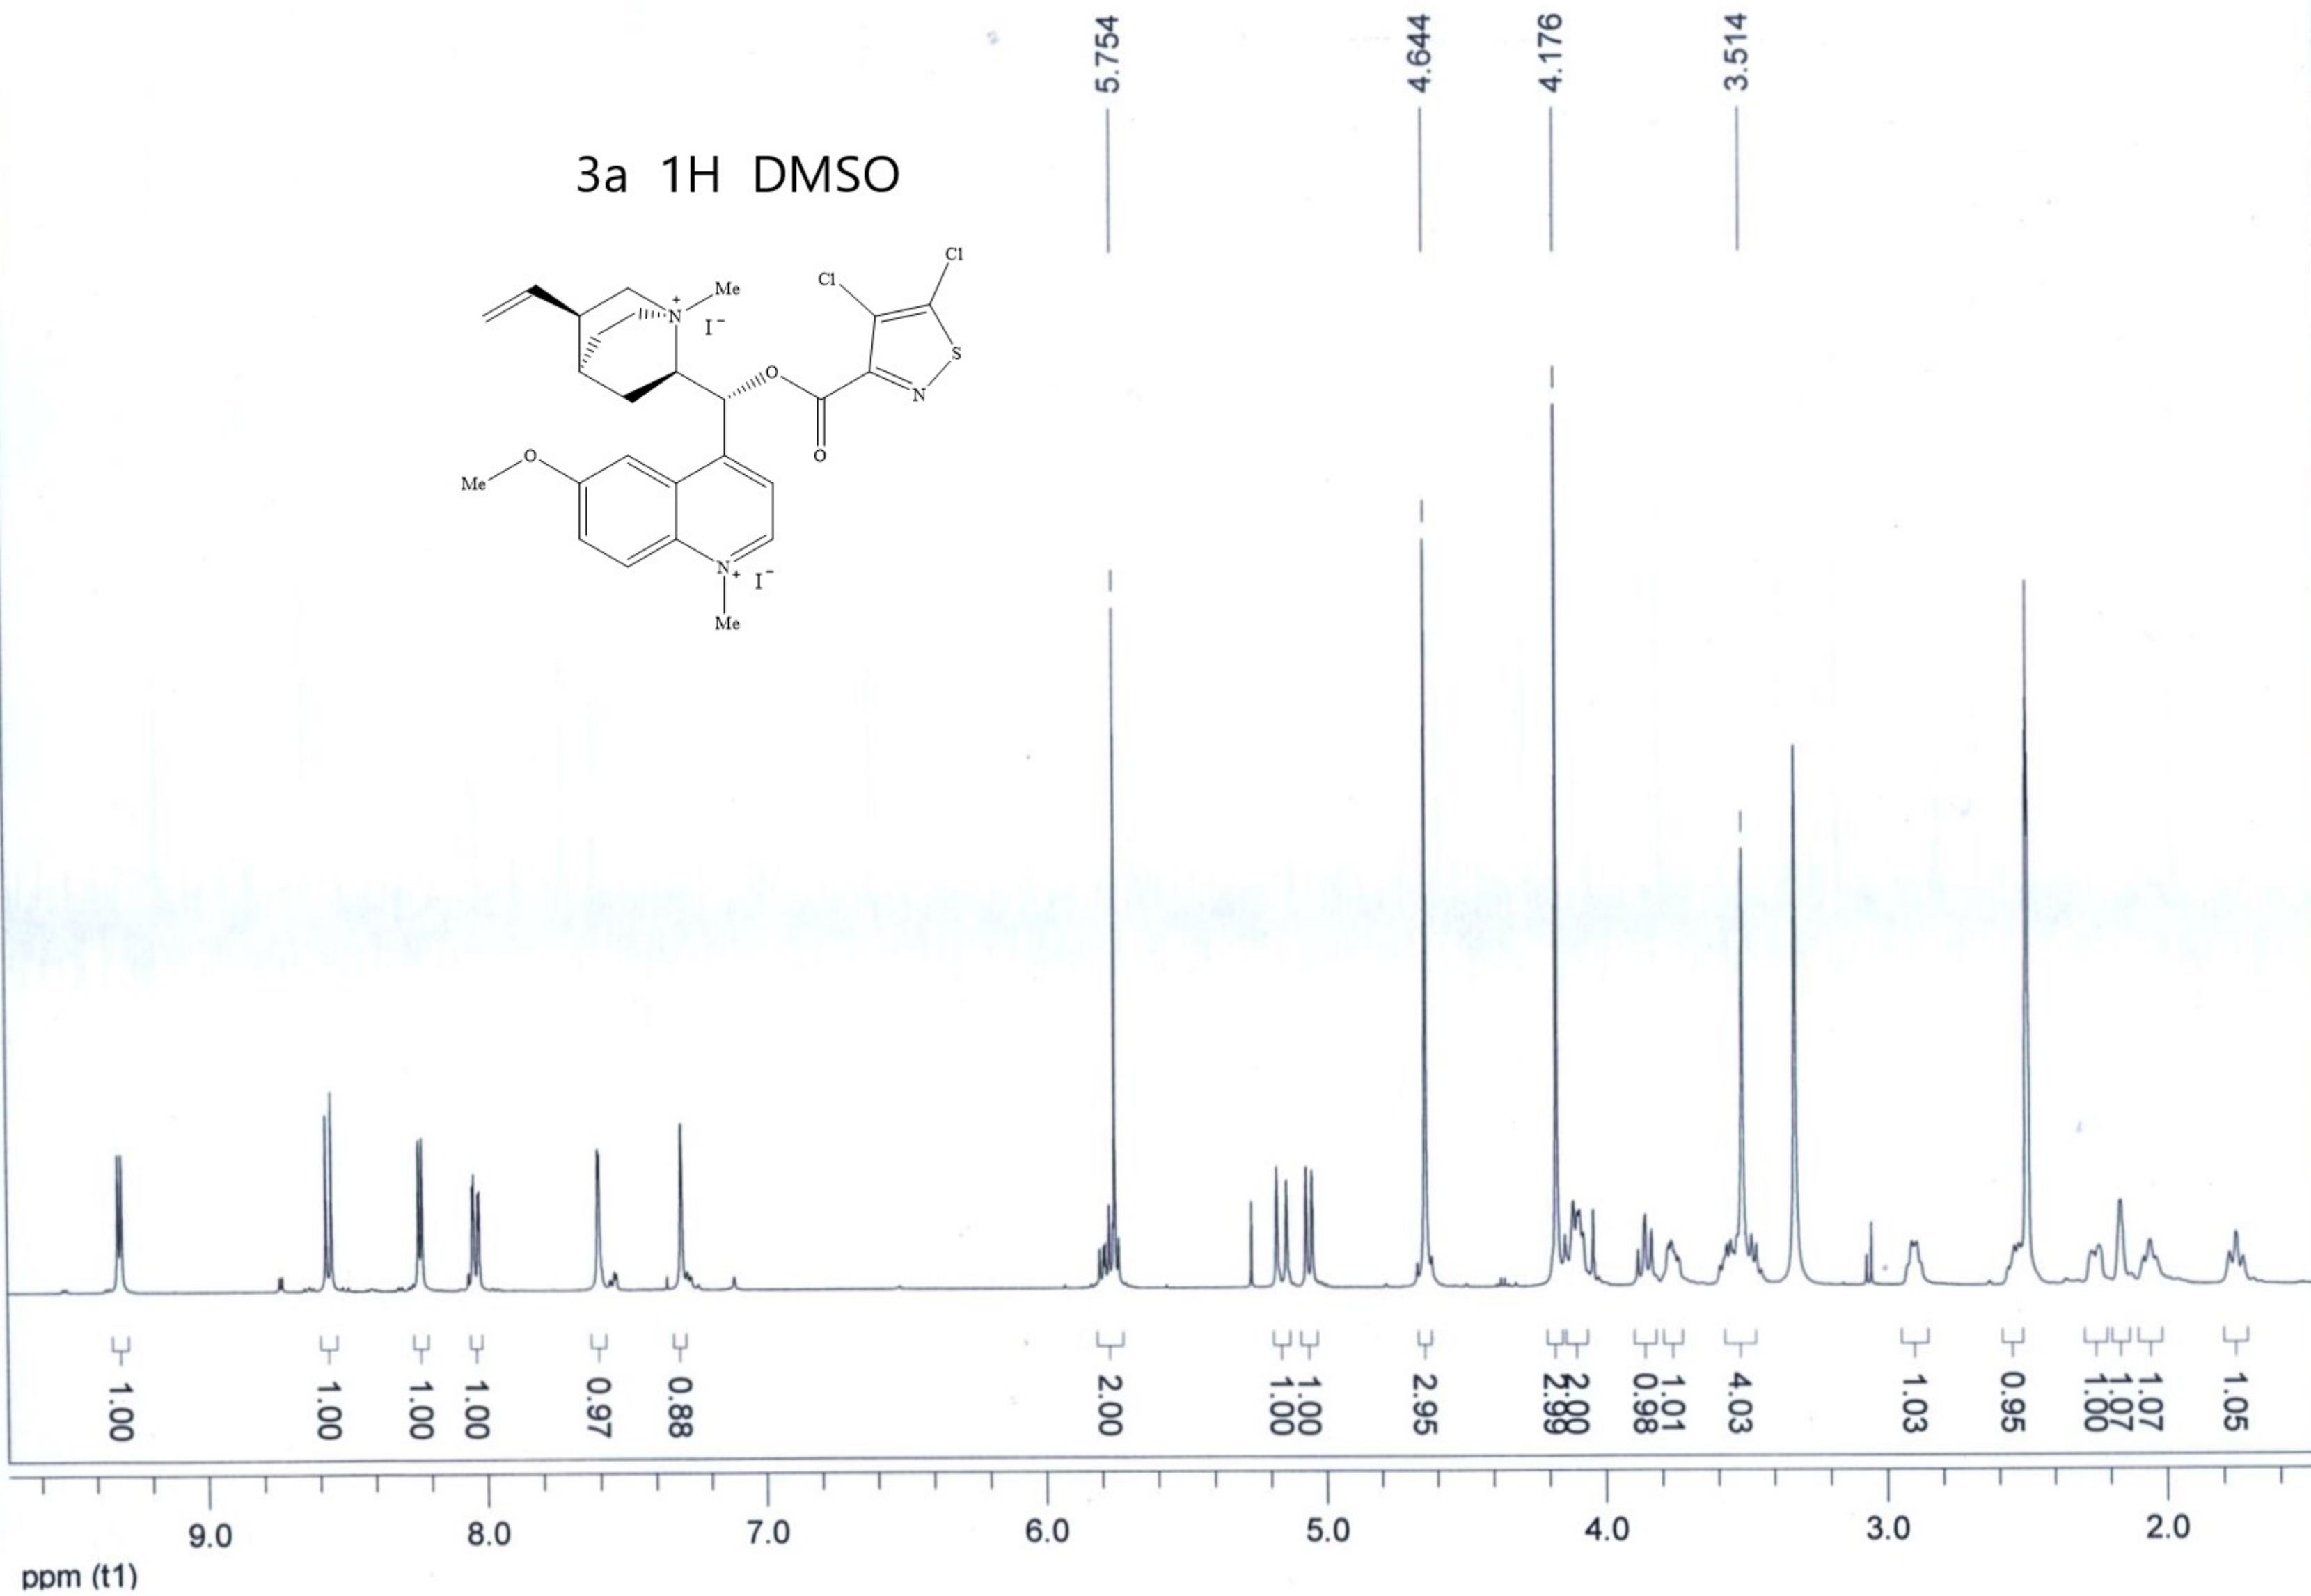

Supplement: s1 [file s1]

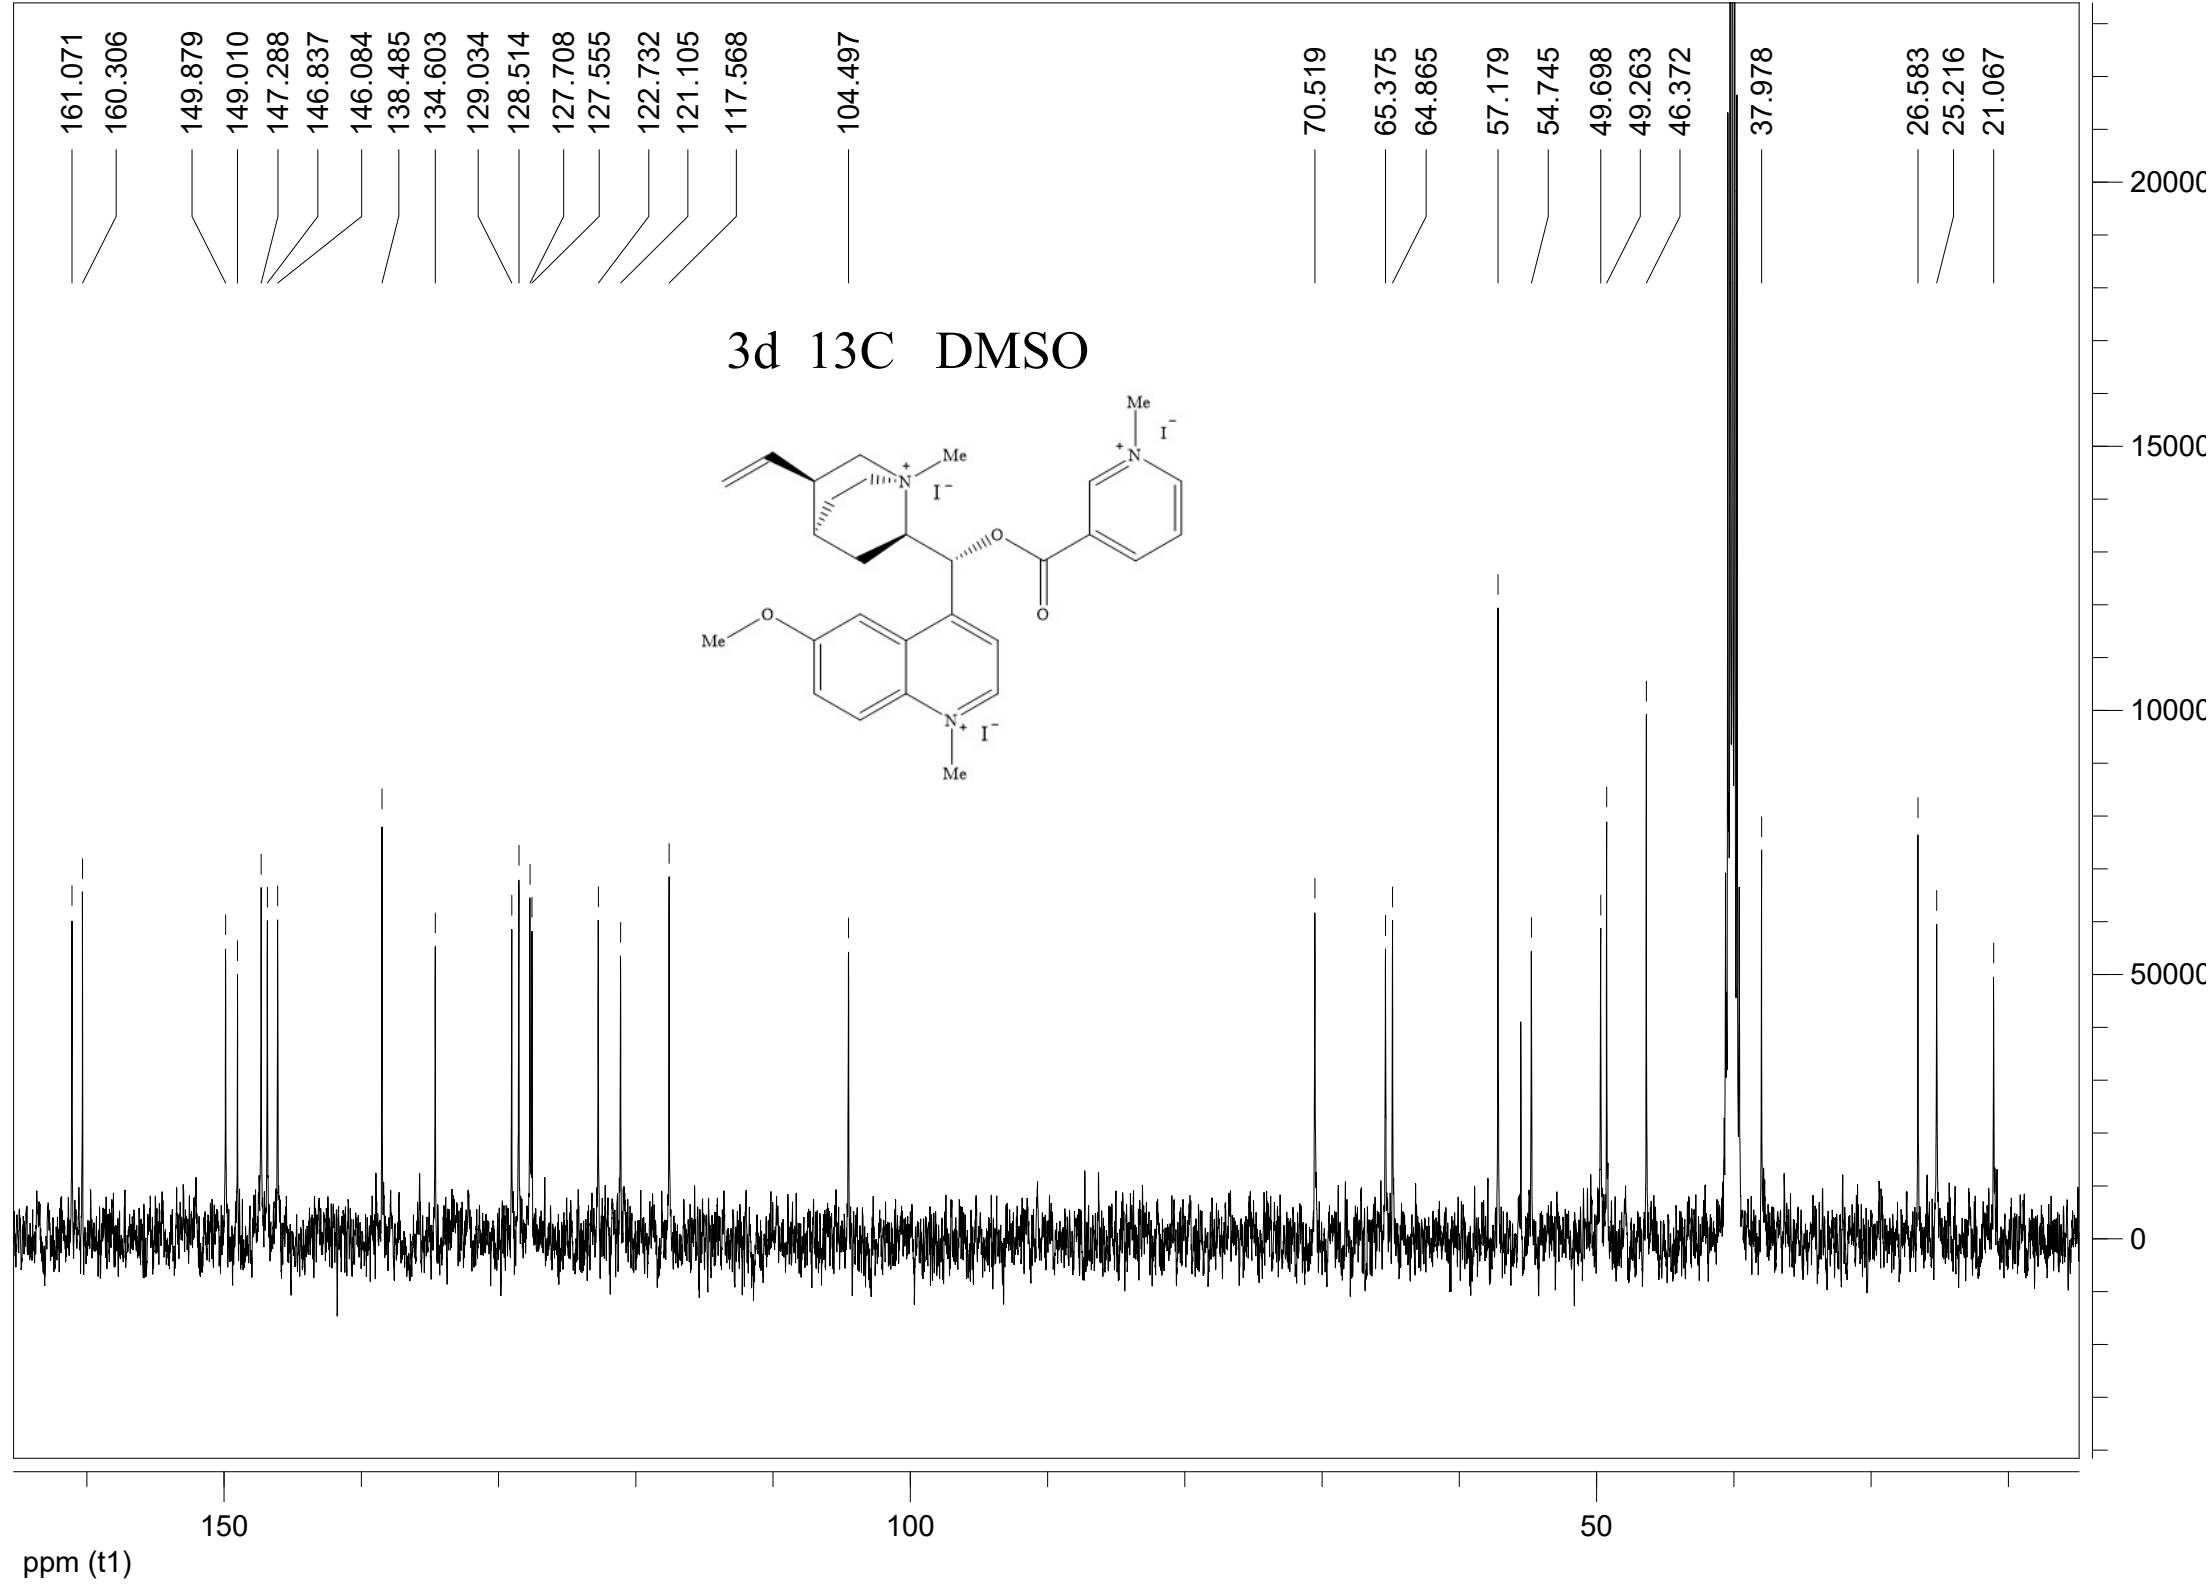

Supplement: s1 [file s1]

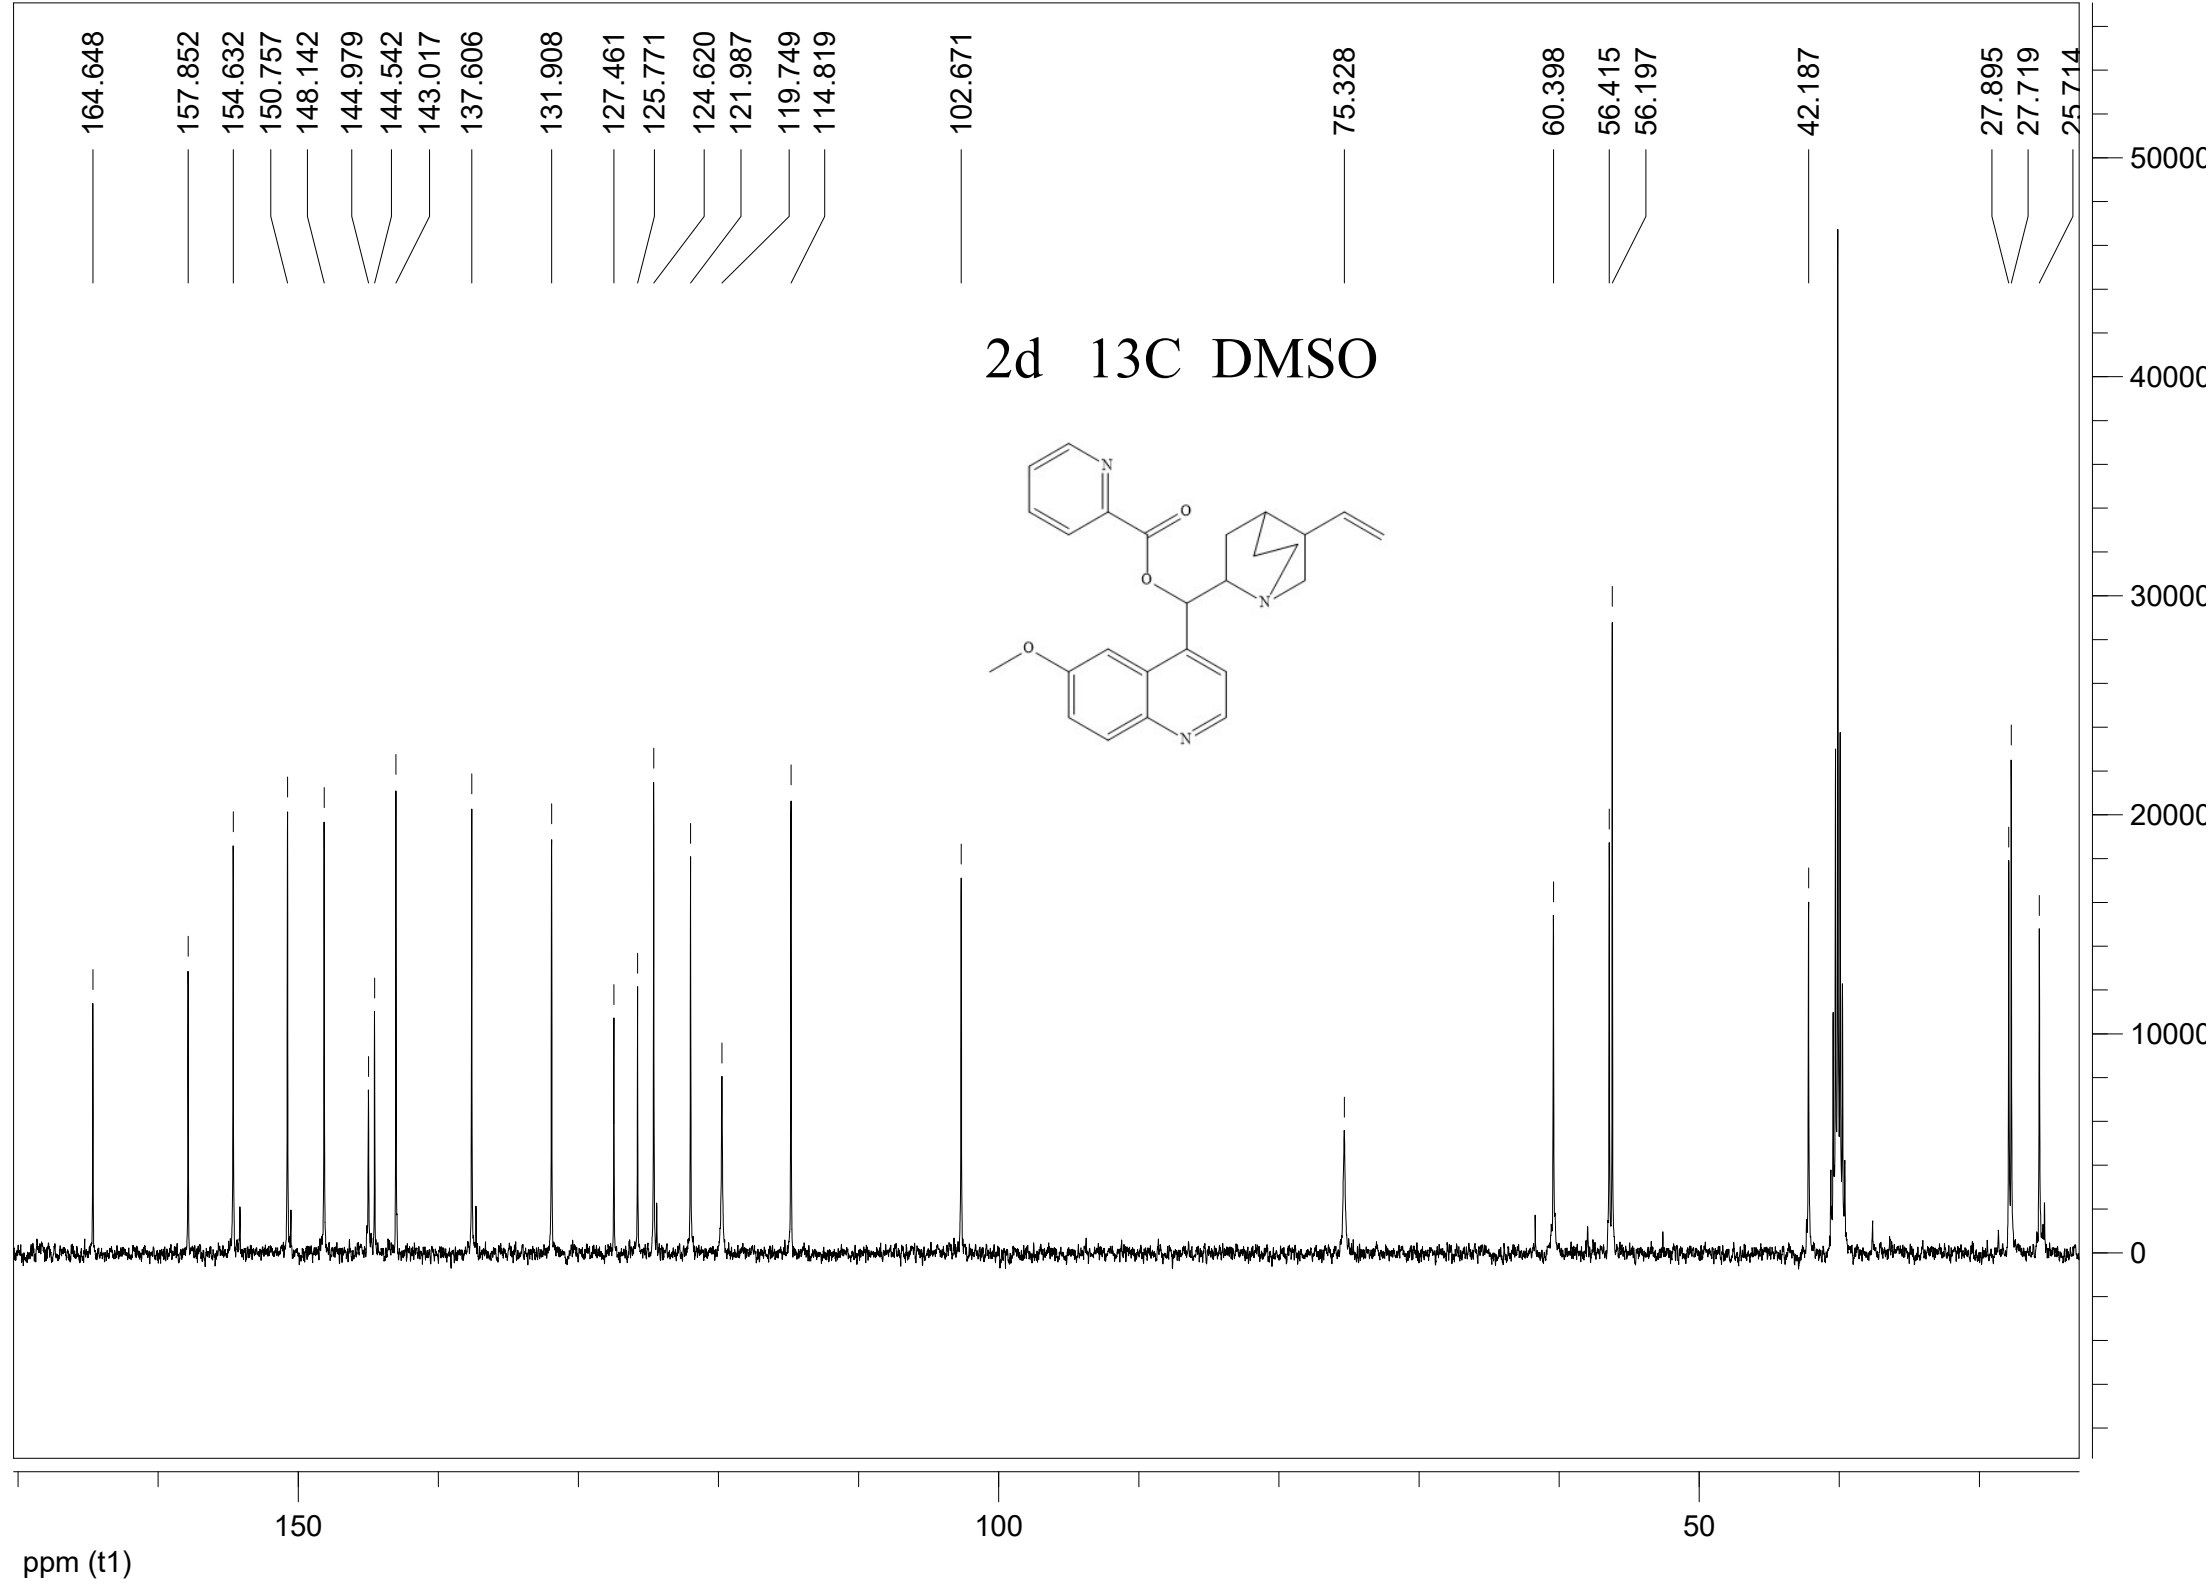

Supplement: s1 [file s1]
